# Supplementary material
Source: PubMed Central journal article supplement (PMC8346518)

## **Table of Contents**

|                                 |               |
|---------------------------------|---------------|
| Supplementary Tables S1-S5      | Pages S2-S11  |
| Supplementary Figures S1-S4     | Pages S12-S32 |
| Experimental Procedures         | Pages S33-S38 |
| Compound Characterization Data  | Pages S39-S47 |
| X-ray crystallographic analyses | Page S48-S50  |
| References                      | Page S51      |
| NMR Spectra                     | Pages S52-S77 |

**Table S1.** Activity of hemin and hemoproteins in the intramolecular cyclopropanation of (*E*)-4-phenylbut-3-en-1-yl 2-diazoacetate (**1a**). Reaction conditions: 20  $\mu$ M catalyst, 2.5 mM **1a**, 10 mM Na<sub>2</sub>S<sub>2</sub>O<sub>4</sub>, in KPi buffer (50 mM, pH 7), room temperature, 16 hours, in anaerobic chamber. The reaction with Fe(TPP)Cl (= meso-Tetraphenylporphyrin iron(III) chloride, CAS Number 16456-81-8) was performed in dichloromethane.

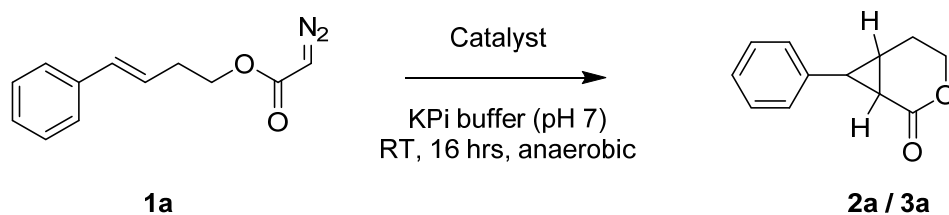

| Entry | Catalyst                                                    | Yield (GC) | TON | % <i>ee</i> |
|-------|-------------------------------------------------------------|------------|-----|-------------|
| 1     | Hemin                                                       | 0%         | 0   | n.d.        |
| 2     | Fe(TPP)Cl in DCM                                            | 0%         | 0   | n.d.        |
| 3     | Mb                                                          | 0%         | 0   | n.d.        |
| 4     | Catalase                                                    | 0%         | 0   | n.d.        |
| 5     | Cytochrome <i>c</i> (equine heart)                          | 0%         | 0   | n.d.        |
| 6     | Cytochrome <i>c</i> ( <i>Hydrogenobacter thermophilus</i> ) | 0%         | 0   | n.d.        |
| 7     | P450 <sub>BM3</sub>                                         | 0%         | 0   | n.d.        |
| 8     | P450 XplA                                                   | 0%         | 0   | n.d.        |
| 9     | P450 BezE                                                   | 0%         | 0   | n.d.        |

**Table S2.** Activity and selectivity of a library of engineered Mb variants in the intramolecular cyclopropanation of (*E*)-4-phenylbut-3-en-1-yl 2-diazoacetate (**1a**). Reaction conditions: 20  $\mu$ M protein, 2.5 mM **1a**, 10 mM Na<sub>2</sub>S<sub>2</sub>O<sub>4</sub>, in KPi buffer (50 mM, pH 7), room temperature, 16 hours, in anaerobic chamber. Negative % *ee* values refer to formation of (*1R,6R,7R*)-isomer **3a** as the major enantiomer.

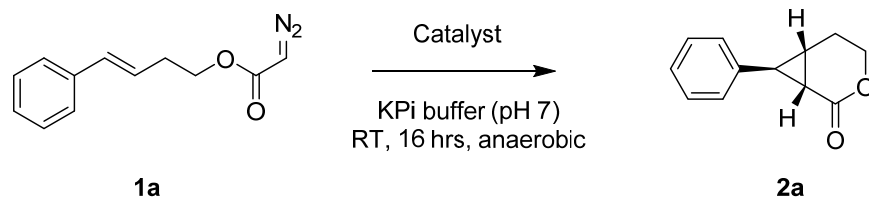

| Entry | Mutations            | Yield | TON | % <i>ee</i><br>( <i>1S,6S,7S</i> ) |
|-------|----------------------|-------|-----|------------------------------------|
| 1     | none (WT)            | 0.0%  | 0   | n.d.                               |
| 2     | H64V/V68A            | 0.1%  | 0   | n.d.                               |
| 3     | H64V                 | 0.1%  | 0   | n.d.                               |
| 4     | H64G                 | 0.2%  | 0   | n.d.                               |
| 5     | V68A                 | 0.0%  | 0   | n.d.                               |
| 6     | L29A                 | 0.0%  | 0   | n.d.                               |
| 7     | L29A/H64V/V68A       | 0.0%  | 0   | n.d.                               |
| 8     | H64A/V68A            | 0.2%  | 0   | n.d.                               |
| 9     | H64V/V68G            | 1.0%  | 1   | 4                                  |
| 10    | L29T/H64V/V68L       | 0.3%  | 0   | n.d.                               |
| 11    | L29T/H64V/V68F       | 0.4%  | 0   | 4                                  |
| 12    | L29T/H64V/V68F/I107L | 0.0%  | 0   | n.d.                               |
| 13    | L29S/H64V/V68F       | 0.0%  | 0   | n.d.                               |
| 14    | L29T/F43W/H64V/V68F  | 0.3%  | 0   | n.d.                               |
| 15    | L29F/F43S/H64V       | 0.2%  | 0   | n.d.                               |
| 16    | H64G/V68A            | 0.4%  | 0   | 53                                 |
| 17    | L29F/H64V/V68A       | 0.0%  | 0   | n.d.                               |
| 18    | F43V/H64A/V68A       | 0.3%  | 0   | n.d.                               |
| 19    | H64V/I107S           | 0.0%  | 0   | n.d.                               |
| 20    | L29T/H64V            | 0.0%  | 0   | n.d.                               |

---

|    |                      |      |   |      |
|----|----------------------|------|---|------|
| 21 | F43Y/H64V/V68A       | 0.0% | 0 | n.d. |
| 22 | V68F                 | 0.4% | 0 | -26  |
| 23 | F43A/V68F            | 0.0% | 0 | n.d. |
| 24 | F43A/H64W/V68F       | 0.9% | 1 | -65  |
| 25 | H64V/I107Y           | 0.0% | 0 | n.d. |
| 26 | L29S/H64V            | 0.9% | 1 | 57   |
| 27 | F43V/V68F            | 0.0% | 0 | n.d. |
| 28 | L29C/H64V            | 0.7% | 1 | 15   |
| 29 | L29A/H64V/I107S      | 0.0% | 0 | n.d. |
| 30 | L29W/F43V/V68F       | 0.5% | 1 | -7   |
| 31 | F43A/H64W/T67S/V68F  | 0.4% | 1 | -49  |
| 32 | V68G                 | 1.1% | 1 | 16   |
| 33 | H64A                 | 0.8% | 1 | -27  |
| 34 | F43A                 | 0.0% | 0 | n.d. |
| 35 | F43V/H64W            | 0.7% | 1 | 16   |
| 36 | L29F/H64V/V68F       | 0.0% | 0 | n.d. |
| 37 | F43G                 | 0.8% | 1 | 9    |
| 38 | F43V/H64V/V68F       | 0.5% | 1 | -1   |
| 39 | F43V/H64F            | 0.9% | 1 | 1    |
| 40 | H64V/V68F            | 0.5% | 2 | 0    |
| 41 | F43Y/H64V/V68A/I107V | 0.0% | 0 | n.d. |
| 42 | F43I/H64V            | 0.9% | 1 | 33   |
| 43 | F43Y/H64V/V68F       | 0.8% | 1 | -18  |
| 44 | F43V/V68L            | 0.7% | 1 | 25   |
| 45 | F43Y/V68F            | 0.9% | 1 | -23  |
| 46 | H64V/F43W            | 0.1% | 0 | n.d. |
| 47 | H64V/F43Q            | 0.0% | 0 | n.d. |
| 48 | H64V/F43C            | 0.2% | 0 | n.d. |
| 49 | H64V/F43G            | 0.0% | 0 | n.d. |
| 50 | H64V/F43M            | 0.4% | 1 | n.d. |
| 51 | H64V/F43T            | 0.0% | 0 | n.d. |

---

---

|    |            |      |   |      |
|----|------------|------|---|------|
| 52 | H64V/F43Y  | 0.2% | 0 | n.d. |
| 53 | H64V/F43D  | 0.0% | 0 | n.d. |
| 54 | H64V/F43A  | 0.0% | 0 | n.d. |
| 55 | H64V/F43S  | 0.0% | 0 | n.d. |
| 56 | H64V/I107N | 0.0% | 0 | n.d. |
| 57 | H64V/I107K | 0.0% | 0 | n.d. |
| 58 | H64V/I107E | 0.0% | 0 | n.d. |
| 59 | H64V/I107D | 0.0% | 0 | n.d. |
| 60 | H64V/I107V | 0.4% | 1 | n.d. |
| 61 | H64V/I107H | 0.0% | 0 | n.d. |
| 62 | H64V/I107W | 0.0% | 0 | n.d. |
| 63 | H64V/I107T | 0.0% | 0 | n.d. |
| 64 | H64V/I107P | 0.0% | 0 | n.d. |
| 65 | H64V/I107L | 0.0% | 0 | n.d. |
| 66 | H64V/V68D  | 0.0% | 0 | n.d. |
| 67 | H64V/V68T  | 0.2% | 0 | n.d. |
| 68 | H64V/V68S  | 0.3% | 0 | n.d. |
| 69 | H64V/V68W  | 0.4% | 1 | -23  |
| 70 | H64V/V68E  | 0.0% | 0 | n.d. |
| 71 | H64V/V68N  | 0.0% | 0 | n.d. |
| 72 | H64V/V68R  | 0.0% | 0 | n.d. |
| 73 | H64V/V68C  | 0.5% | 1 | 11   |
| 74 | H64V/L29P  | 0.0% | 0 | n.d. |
| 75 | H64V/L29M  | 0.0% | 0 | n.d. |
| 76 | H64V/L29A  | 0.3% | 0 | n.d. |
| 77 | H64V/L29Y  | 0.0% | 0 | n.d. |
| 78 | H64V/L29F  | 0.5% | 1 | -7   |
| 79 | H64V/L29N  | 0.0% | 0 | n.d. |
| 80 | H64V/L29H  | 0.1% | 0 | n.d. |
| 81 | H64V/L29G  | 0.4% | 1 | n.d. |
| 82 | H64V/L29Q  | 0.0% | 0 | n.d. |

---

**Table S3** Activity and stereoselectivity of selected Mb variants identified during the catalyst optimization process (**Figures 2 and 3** in main text) toward the intramolecular cyclopropanation of **1a**. Reaction conditions: 2.5 mM **1a**, 20  $\mu$ M purified protein in 0.5 mL KPi buffer (50 mM, pH 7), room temperature, 16 hours in anaerobic chamber. Positive and negative % *ee* values refer to formation of (1*S*,6*S*,7*S*)-isomer **2a** and (1*R*,6*R*,7*R*)-isomer **3a**, respectively, as the major enantiomer.

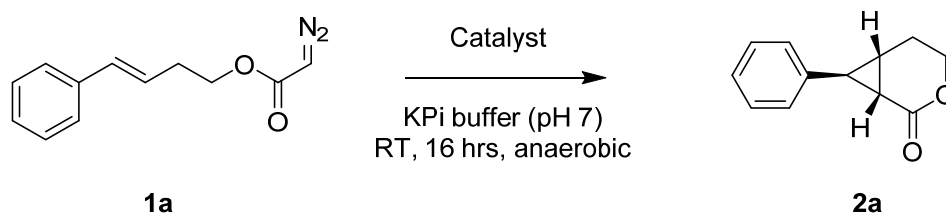

| Mutations            | Yield (GC) | TON | % <i>ee</i> (1 <i>S</i> ,6 <i>S</i> ,7 <i>S</i> ) |
|----------------------|------------|-----|---------------------------------------------------|
| - (WT)               | 0%         | 0   | n.d.                                              |
| V68G                 | 1.1%       | 1   | 16                                                |
| H64A/V68G            | 1.9%       | 2   | 33                                                |
| H64A/V68G/I107V      | 17%        | 21  | 61                                                |
| F43L/H64A/V68G/I107V | 63%        | 79  | 99                                                |
| H64L/V68G            | 1.5%       | 2   | -31                                               |
| H64L/V68G/I107F      | 24%        | 30  | -89                                               |
| F43H/H64L/V68G/I107F | 43%        | 54  | -99                                               |
| H64A/V68G/I107F      | 37%        | 46  | -74                                               |
| F43Y/H64A/V68G/I107F | 69%        | 86  | -98                                               |

**Table S4.** Optimization studies for Mb(F43L,H64A,V68G,I107V) -catalyzed intramolecular cyclopropanation of **1a** in reactions with purified protein or Mb-expressing *E. coli* cells (C41(DE3)). Reaction conditions: 1-10 mM **1a**, 20  $\mu$ M purified protein or Mb-expressing *E. coli* cells (C41(DE3)) at the indicated cell density (OD<sub>600</sub>) in 0.5 mL KPi buffer (50 mM, pH 7), room temperature, 16 hours in anaerobic chamber.

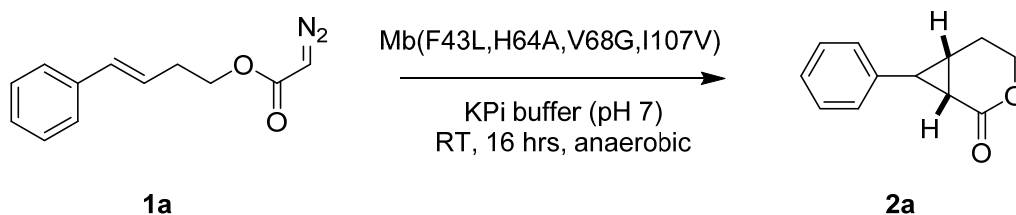

| Catalyst         | Protein/cell conc. | [1a] (mM) | Yield (GC) | TON  | <i>e.e.</i> (1S, 6S, 7S) |
|------------------|--------------------|-----------|------------|------|--------------------------|
| Purified protein | 20 $\mu$ M         | 1         | 99%        | 49   | 99%                      |
| Purified protein | 20 $\mu$ M         | 2.5       | 63%        | 79   | 99%                      |
| Purified protein | 20 $\mu$ M         | 5         | 38%        | 96   | 99%                      |
| Purified protein | 20 $\mu$ M         | 10        | 22%        | 112  | 99%                      |
| Whole cells      | OD = 5             | 1         | >99%       | 506  | 99%                      |
| Whole cells      | OD = 5             | 2.5       | 92%        | 1164 | 99%                      |
| Whole cells      | OD = 5             | 5         | 50%        | 1253 | 99%                      |
| Whole cells      | OD = 5             | 10        | 14%        | 709  | 98%                      |
| Whole cells      | OD = 10            | 1         | >99%       | 253  | 99%                      |
| Whole cells      | OD = 10            | 2.5       | 94%        | 595  | 99%                      |
| Whole cells      | OD = 10            | 5         | 71%        | 898  | 99%                      |
| Whole cells      | OD = 10            | 10        | 28%        | 697  | 99%                      |
| Whole cells      | OD = 20            | 1         | >99%       | 127  | 99%                      |

---

|             |         |     |      |     |     |
|-------------|---------|-----|------|-----|-----|
| Whole cells | OD = 20 | 2.5 | >99% | 316 | 99% |
| Whole cells | OD = 20 | 5   | 66%  | 417 | 99% |
| Whole cells | OD = 20 | 10  | 42%  | 535 | 99% |
| Whole cells | OD = 40 | 1   | >99% | 63  | 99% |
| Whole cells | OD = 40 | 2.5 | 87%  | 137 | 99% |
| Whole cells | OD = 40 | 5   | 80%  | 253 | 99% |
| Whole cells | OD = 40 | 10  | 46%  | 292 | 99% |

---



**Table S5.** Optimization studies for Mb(F43Y, H64A,V68G, I107F) -catalyzed intramolecular cyclopropanation of **1a** in reactions with purified protein or Mb-expressing *E. coli* cells (C41(DE3)). Reaction conditions: 1-10 mM **1a**, 20  $\mu$ M purified protein or Mb-expressing *E. coli* cells (C41(DE3)) at the indicated cell density (OD<sub>600</sub>) in 0.5 mL KPi buffer (50 mM, pH 7), room temperature, 16 hours in anaerobic chamber.

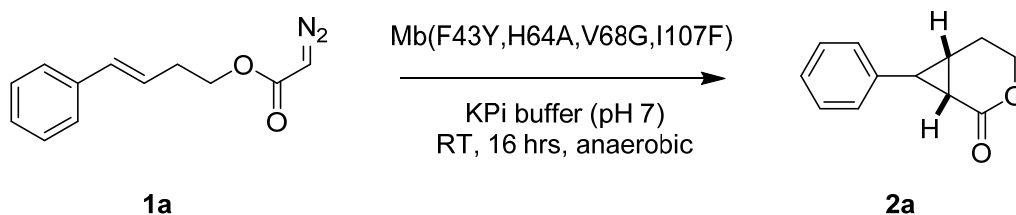

| Catalyst         | Protein/cell conc. | [1a] (mM) | Yield (GC) | TON | <i>e.e.</i> (1R, 6R, 7R) |
|------------------|--------------------|-----------|------------|-----|--------------------------|
| Purified protein | 5 $\mu$ M          | 1         | 70%        | 140 | 98%                      |
| Purified protein | 5 $\mu$ M          | 2.5       | 21%        | 105 | 98%                      |
| Purified protein | 5 $\mu$ M          | 5         | 9.2%       | 92  | 98%                      |
| Purified protein | 10 $\mu$ M         | 1         | 82%        | 82  | 98%                      |
| Purified protein | 10 $\mu$ M         | 2.5       | 36%        | 90  | 98%                      |
| Purified protein | 10 $\mu$ M         | 5         | 16%        | 78  | 98%                      |
| Purified protein | 20 $\mu$ M         | 1         | >99%       | 50  | 98%                      |
| Purified protein | 20 $\mu$ M         | 2.5       | 69%        | 86  | 98%                      |
| Purified protein | 20 $\mu$ M         | 5         | 37%        | 93  | 98%                      |
| Whole cells      | OD = 5             | 1         | 70%        | 436 | 98%                      |
| Whole cells      | OD = 5             | 2.5       | 21%        | 328 | 97%                      |
| Whole cells      | OD = 5             | 5         | 9.2%       | 289 | 97%                      |
| Whole cells      | OD = 5             | 10        | 5.2%       | 326 | 96%                      |

---

|             |         |     |      |     |     |
|-------------|---------|-----|------|-----|-----|
| Whole cells | OD = 10 | 1   | 82%  | 257 | 98% |
| Whole cells | OD = 10 | 2.5 | 36%  | 280 | 98% |
| Whole cells | OD = 10 | 5   | 16%  | 243 | 97% |
| Whole cells | OD = 10 | 10  | 6%   | 186 | 97% |
| Whole cells | OD = 20 | 1   | 93%  | 145 | 98% |
| Whole cells | OD = 20 | 2.5 | 42%  | 163 | 97% |
| Whole cells | OD = 20 | 5   | 20%  | 156 | 96% |
| Whole cells | OD = 20 | 10  | 8.2% | 128 | 96% |
| Whole cells | OD = 40 | 1   | 97%  | 77  | 98% |
| Whole cells | OD = 40 | 2.5 | 66%  | 129 | 98% |
| Whole cells | OD = 40 | 5   | 45%  | 174 | 98% |
| Whole cells | OD = 40 | 10  | 15%  | 118 | 98% |

---

**Table S6.** Oligonucleotide used for site saturation mutagenesis

| <b>Oligonucleotide</b> | <b>sequence (5' – 3')</b>              |
|------------------------|----------------------------------------|
| XhoI Rev               | GGCTTTGTTAGCAGCCGGAT                   |
| L29NNK Fwd             | GTCACGGTCAGGACATCANNKATCCGTCTGTTC      |
| F43NNK Fwd             | CAC CCG GAAACCCTGGAAAAANNKGACCGTTTC    |
| H64NNK Fwd             | GAAGGCTTCTGAAGACCTGAAAAAANNKGGTGTTACCG |
| V68NNK Fwd             | CCTGAAAAAACACGGTGTTACCNNKCTGACCGCT     |
| I107NNK Fwd            | CCCGATCAAATACCTGGAGTTCNNKTCTGAAGCTATC  |

**Figure S1.** Full chiral GC chromatograms of Mb(F43L, H64A, V68G, I107V)-catalyzed reactions with the homoallylic diazoacetates. Calibration curves were prepared using isolated product and conversions were calculated from the ratio of the peak areas corresponding to the products and internal standard.

➤ Enzymatic reaction of **1a** (2.5 mM)

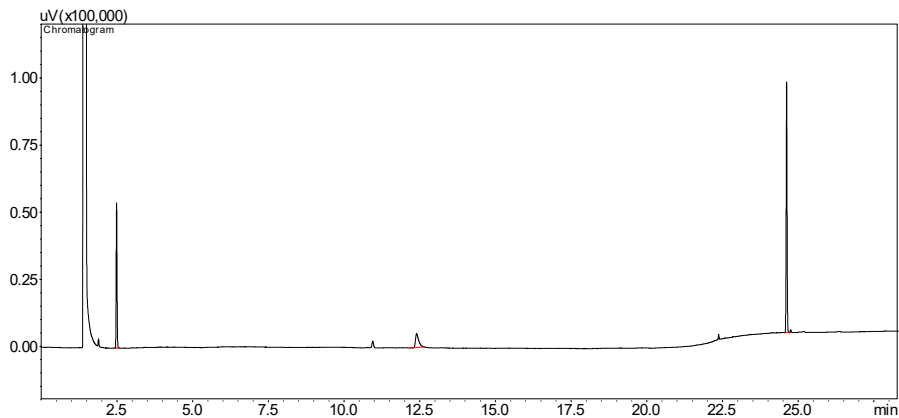

|            |          |
|------------|----------|
| I.S.       | 107012.2 |
| Products   | 189708.7 |
| Conversion | >99%     |

Calibration curve:

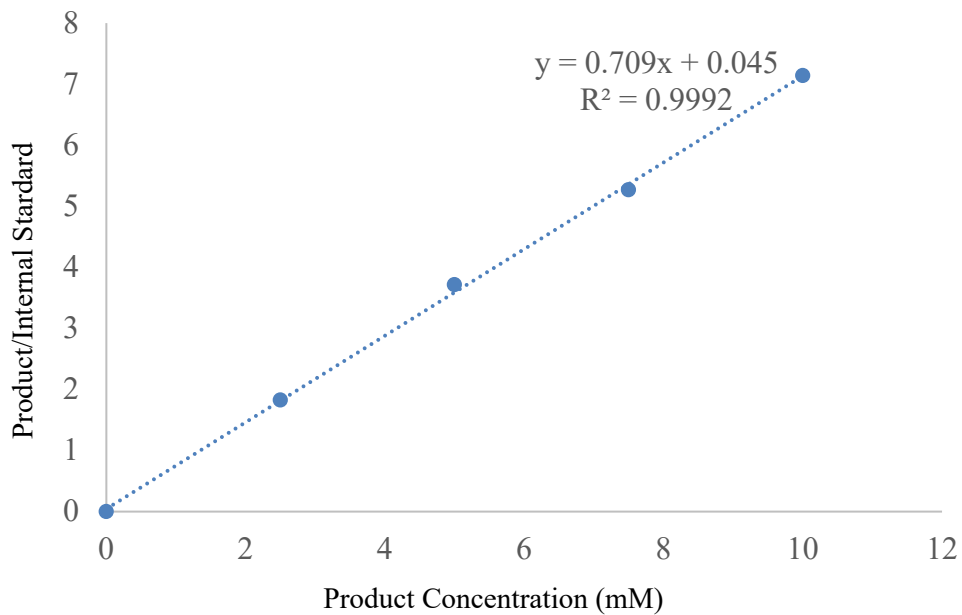

➤ Enzymatic reaction of **1b** (2.5 mM)

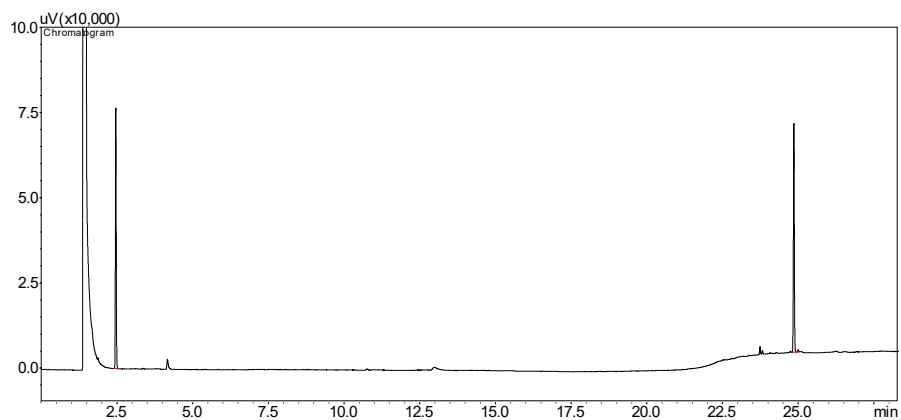

|            |          |
|------------|----------|
| I.S.       | 146773.2 |
| Products   | 141761.4 |
| Conversion | 79%      |

Calibration curve:

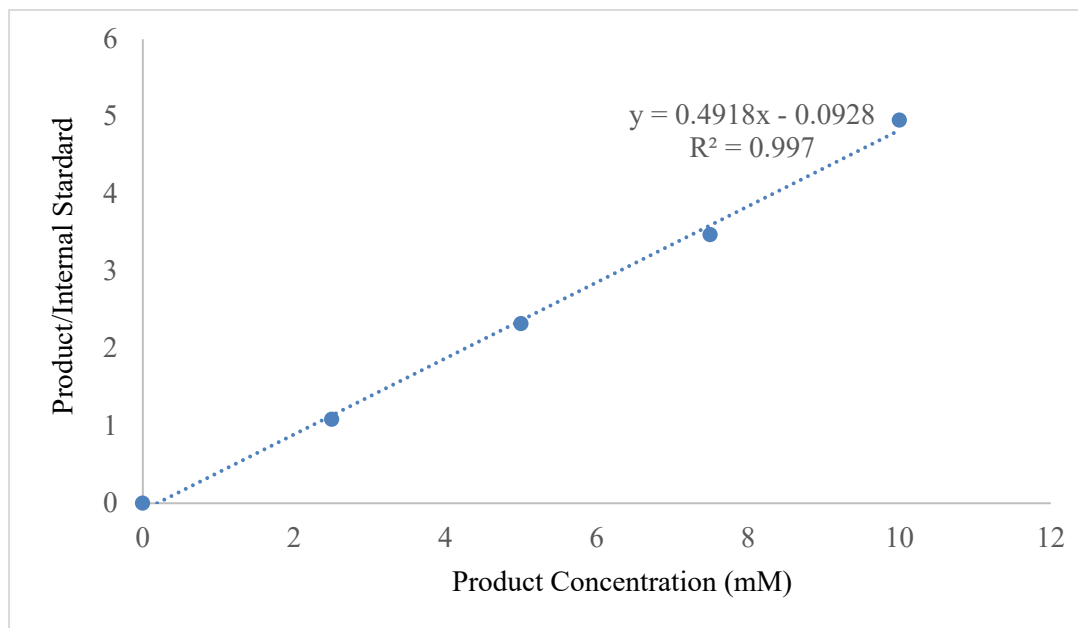

➤ Enzymatic reaction of **1c** (2.5 mM)

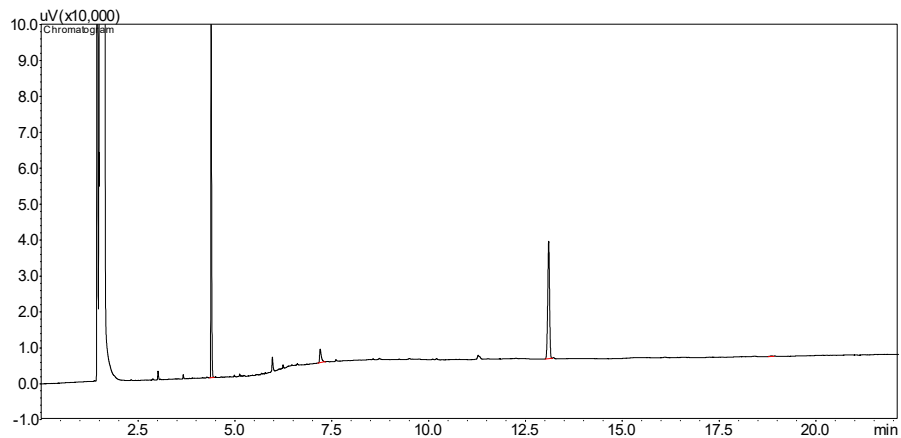

|            |          |
|------------|----------|
| I.S.       | 154606.4 |
| Products   | 106145.0 |
| Conversion | 88%      |

Calibration curve:

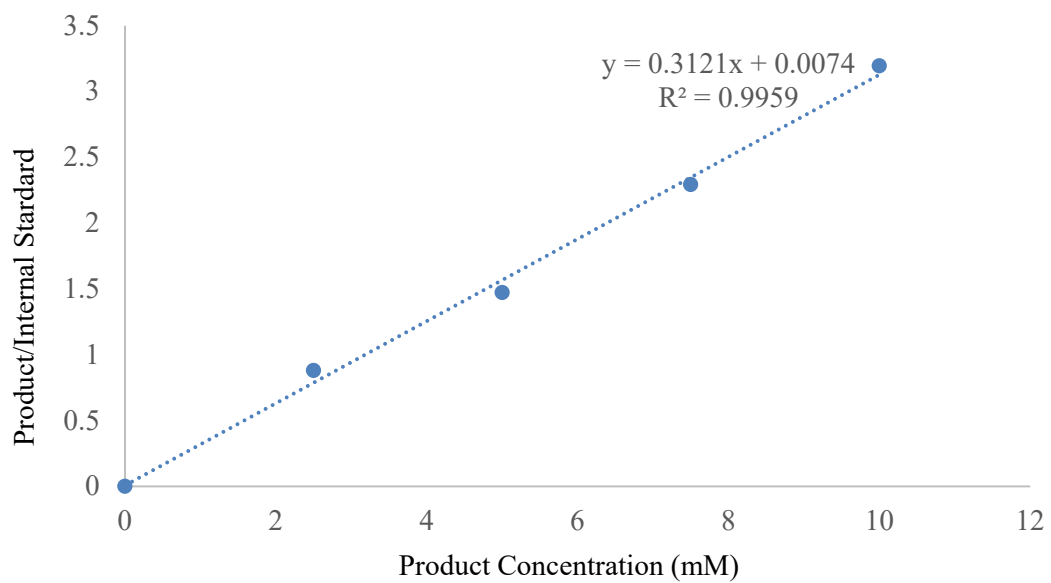

➤ Enzymatic reaction of **1d** (2.5 mM)

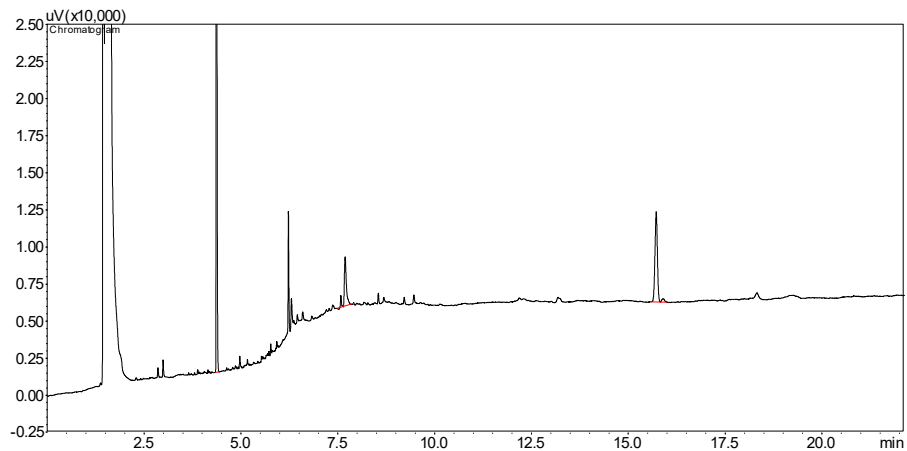

|            |          |
|------------|----------|
| I.S.       | 109028.7 |
| Products   | 26324.8  |
| Conversion | 54%      |

Calibration curve:

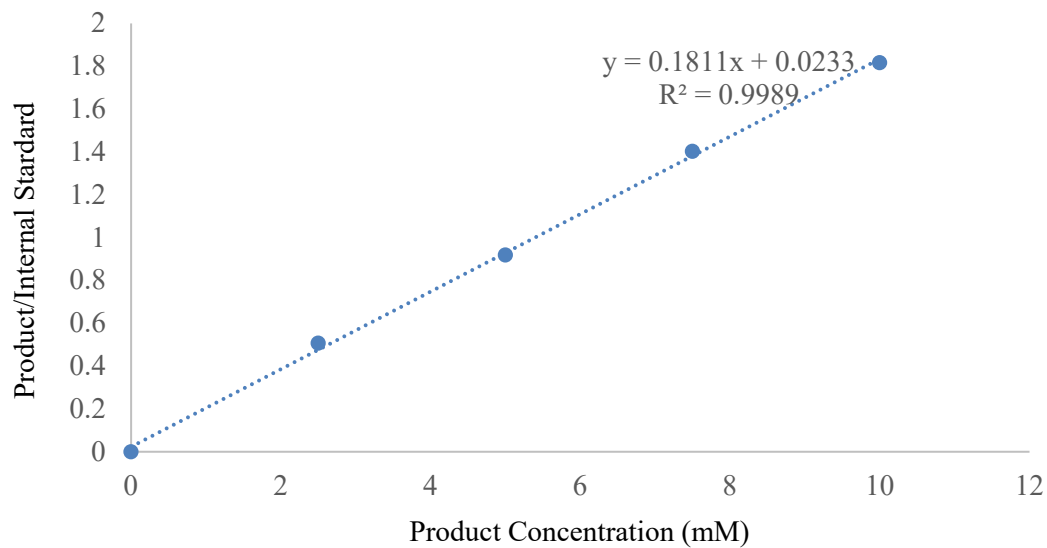

➤ Enzymatic reaction of **1e** (2.5 mM)

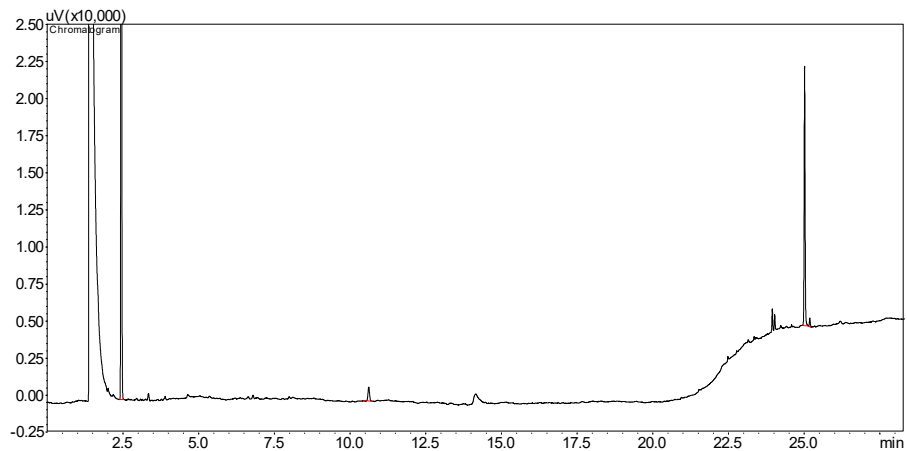

|            |          |
|------------|----------|
| I.S.       | 136336.7 |
| Products   | 38088.0  |
| Conversion | 55%      |

Calibration curve:

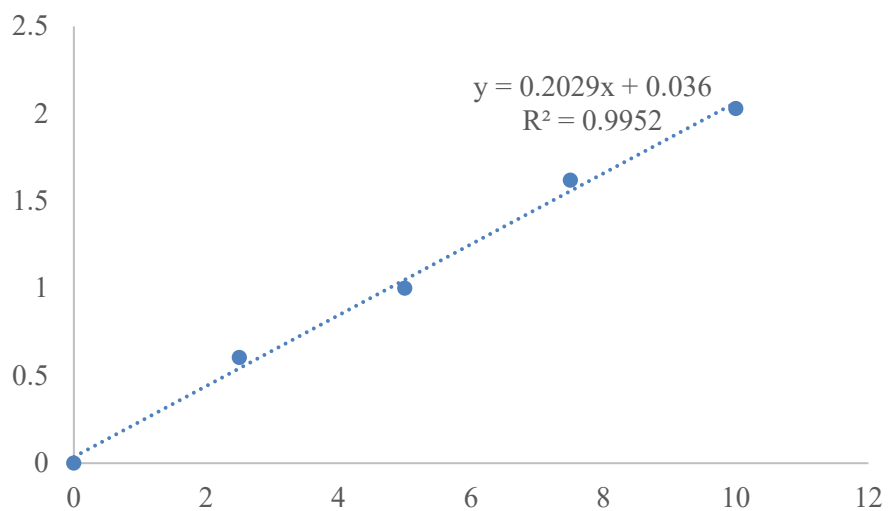



➤ Enzymatic reaction of **1f** (2.5 mM)

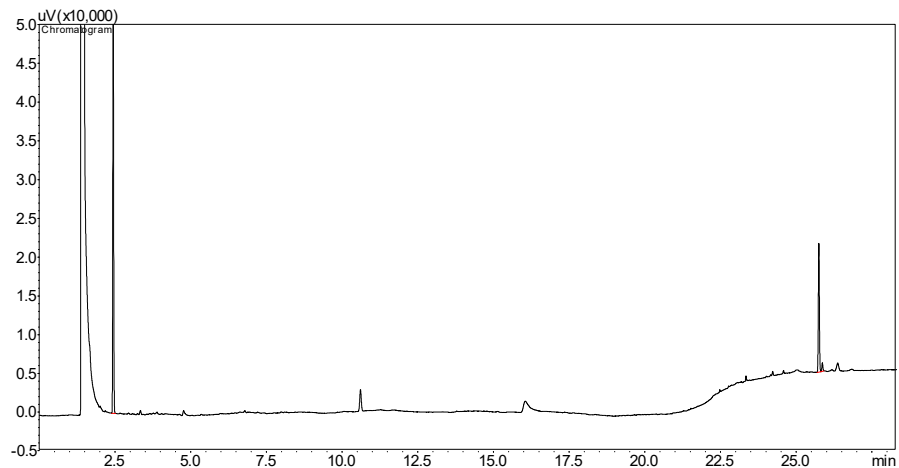

|            |          |
|------------|----------|
| I.S.       | 111830.7 |
| Products   | 39503.0  |
| Conversion | 36%      |

Calibration curve:

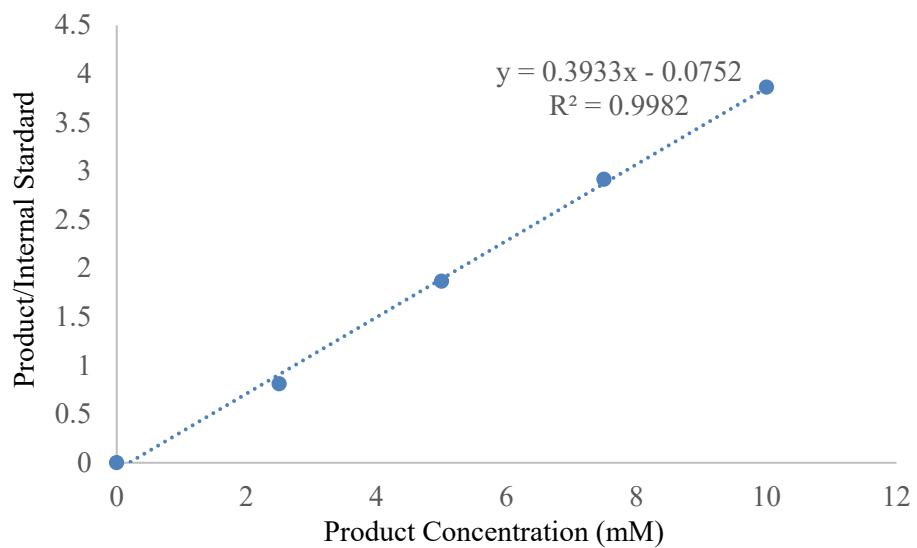

➤ Enzymatic reaction of **1g** (2.5 mM)

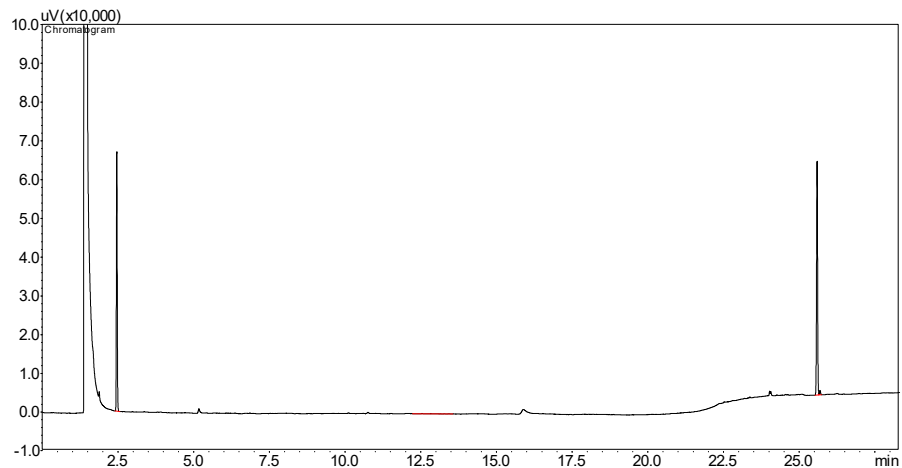

|            |          |
|------------|----------|
| I.S.       | 128891.2 |
| Products   | 139934.9 |
| Conversion | 95%      |

Calibration curve:

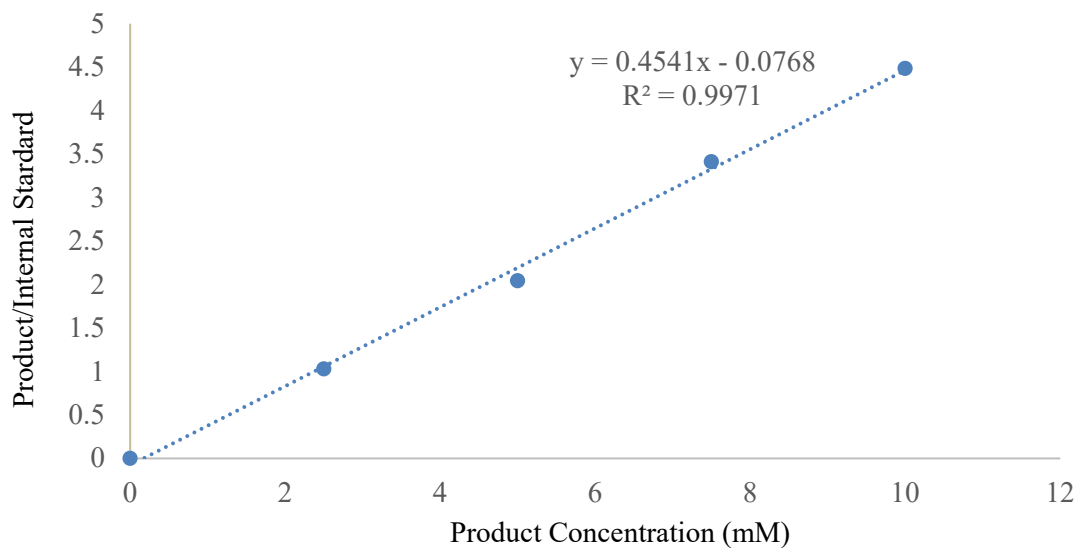

➤ Enzymatic reaction of **1h** (2.5 mM)

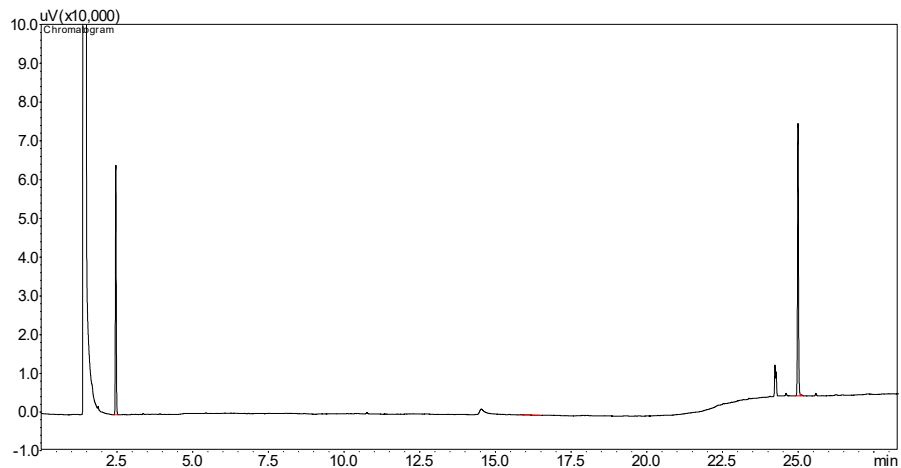

|            |          |
|------------|----------|
| I.S.       | 123900.1 |
| Products   | 156088.1 |
| Conversion | 99%      |

Calibration curve:

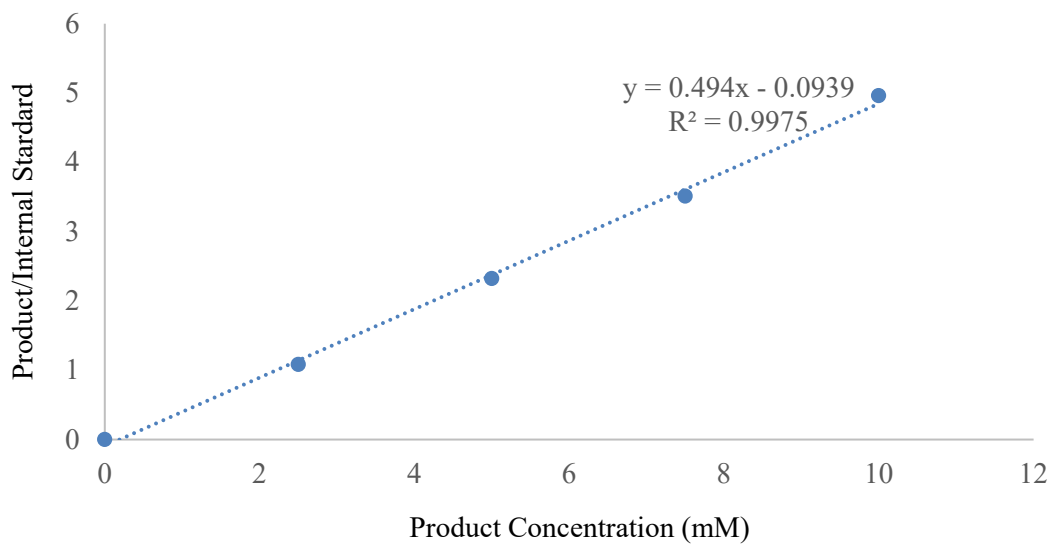

➤ Enzymatic reaction of **1i** (2.5 mM)

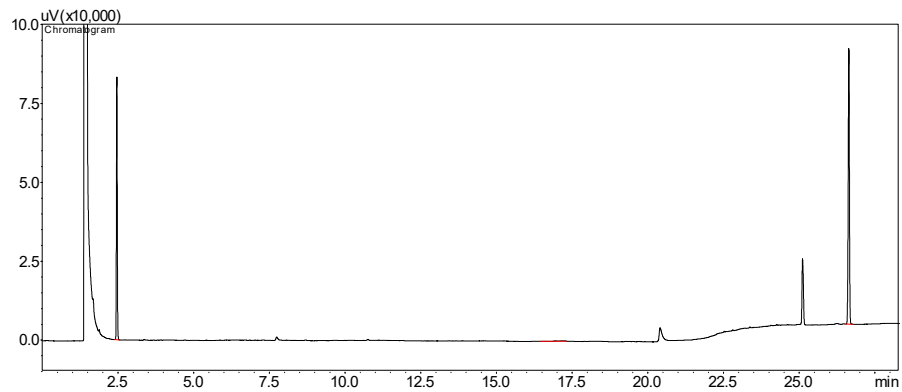

|            |          |
|------------|----------|
| I.S.       | 162053.8 |
| Products   | 239348.2 |
| Conversion | 99%      |

Calibration curve:

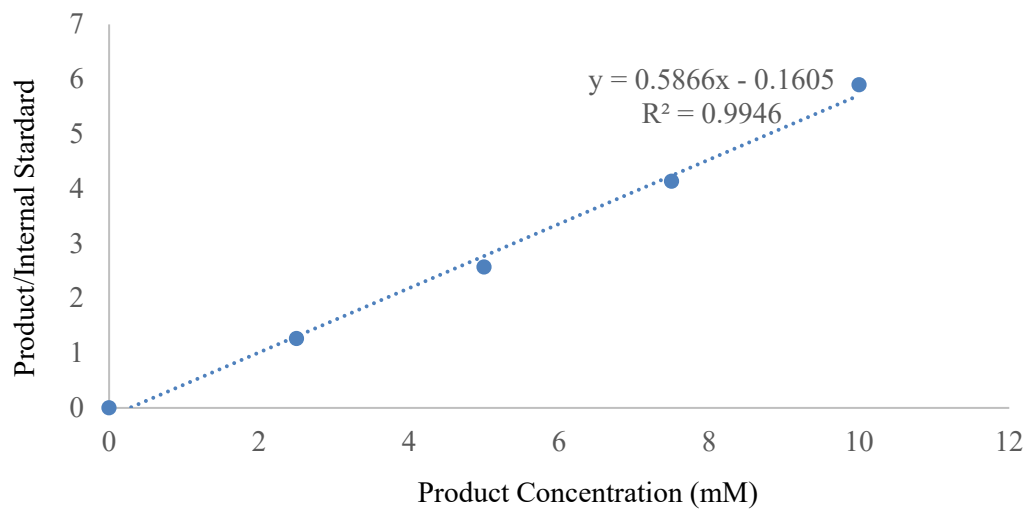

➤ Enzymatic reaction of **1j** (1 mM)

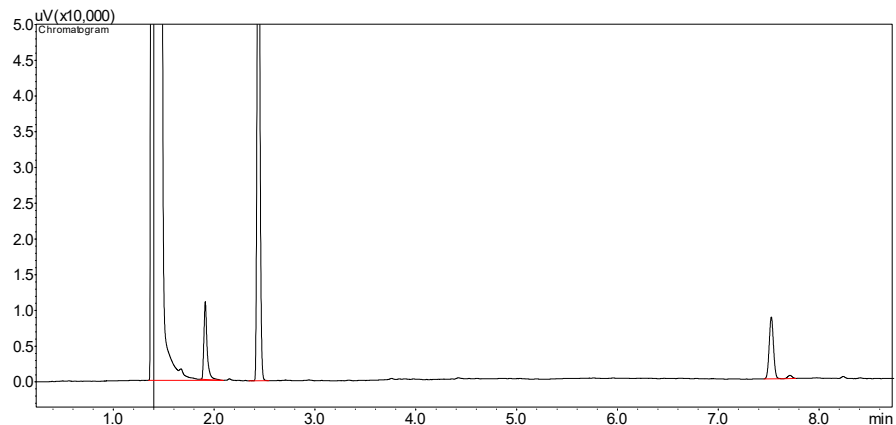

|            |          |
|------------|----------|
| I.S.       | 172074.5 |
| Products   | 25495.7  |
| Conversion | 41%      |

Calibration curve:

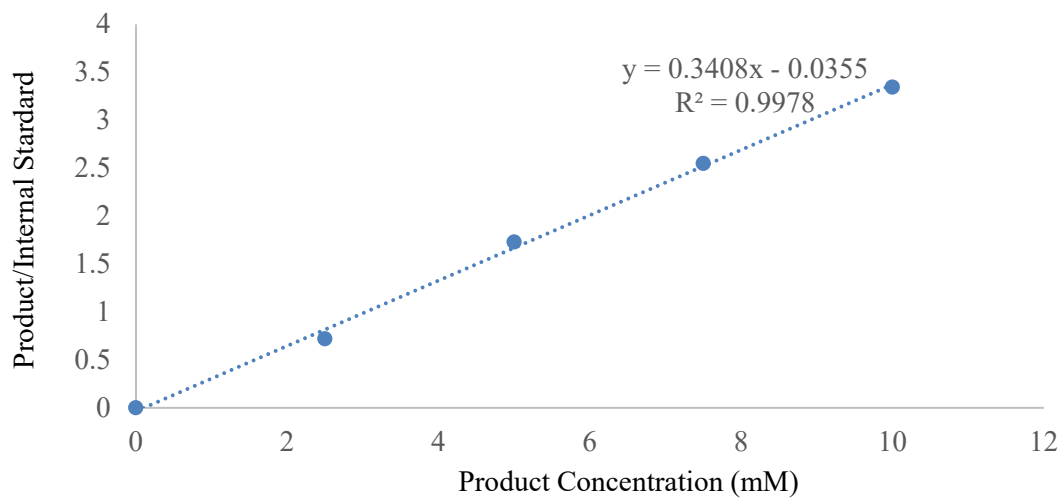

**Figure S2.** Chiral GC analysis for the determination of an enantiomeric excess in the Mb-catalyzed intramolecular cyclopropanation reactions. The reference racemic samples were prepared with engineered myoglobin variant as described in the following figures.

- Chiral GC analysis of racemic **2a** + **3a** (using Mb(H64A,V68G,I107L); *top*) and enantioenriched **2a** (using Mb(F43L, H64A, V68G, I107V); *middle*) and enantioenriched **3a** product (using Mb(F43H,H64L,V68G,I107F); *bottom*):

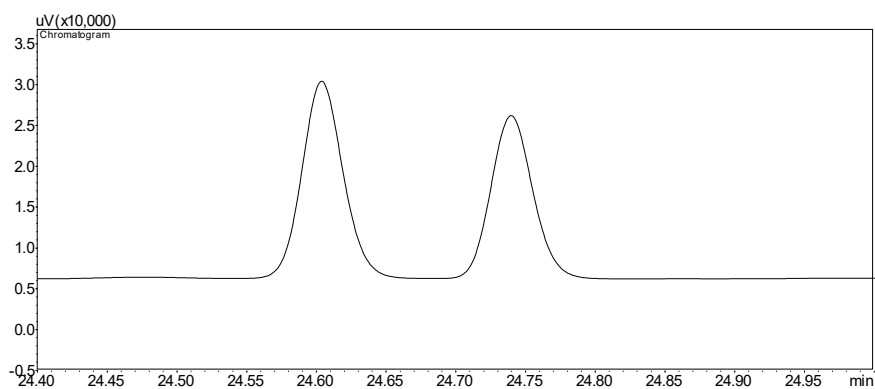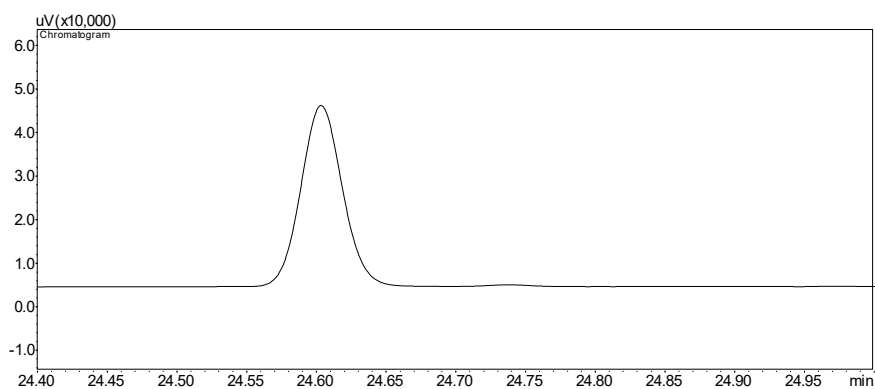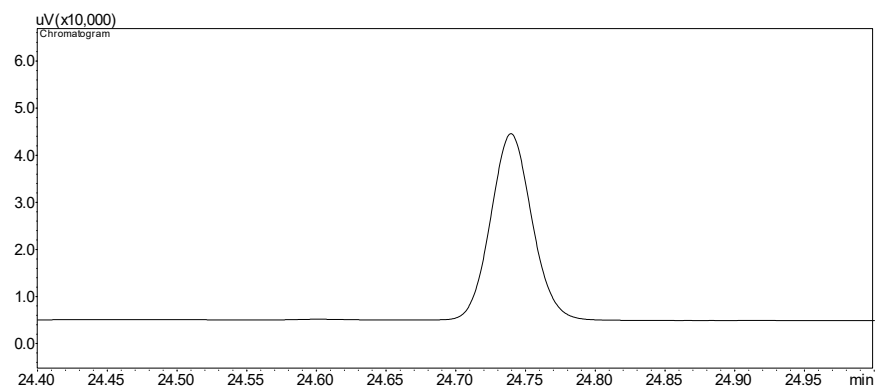

- Chiral GC analysis of racemic (Mb-H64A/V68G/I107L catalyzed protein reaction) **2b/3b** (*top*) and enzymatically produced **2b** (using Mb(F43L, H64A, V68G, I107V); *middle*) and **3b** product (using Mb(F43Y, H64A, V68G, I107F); *bottom*):

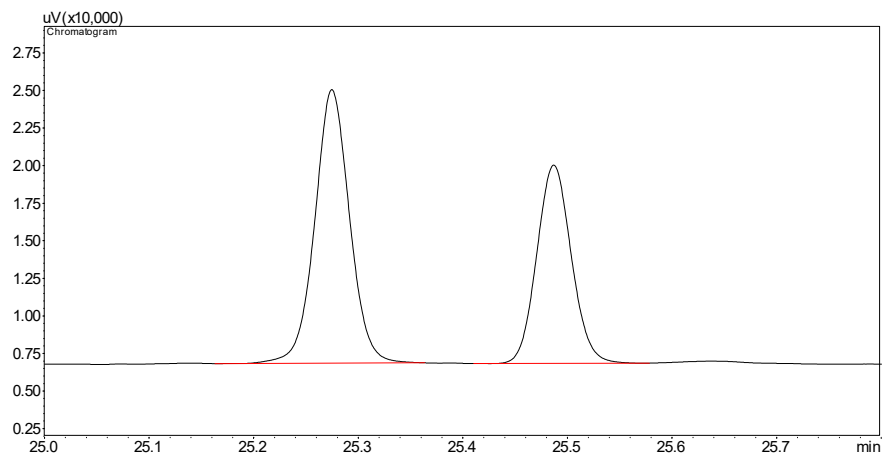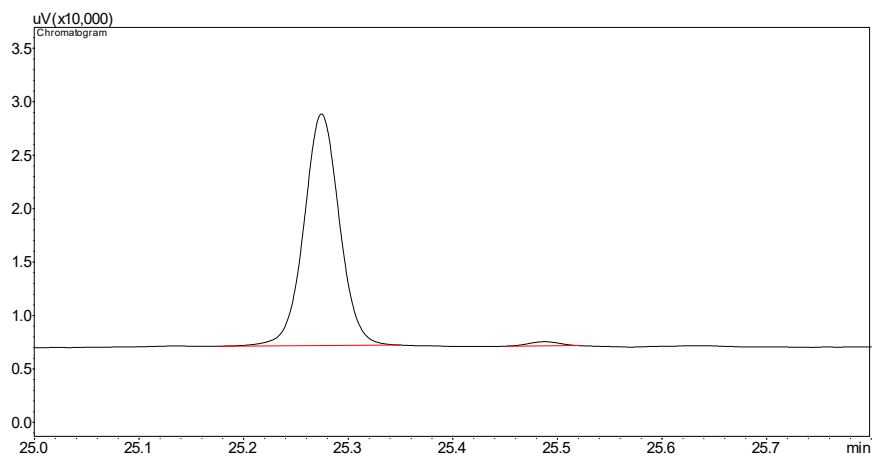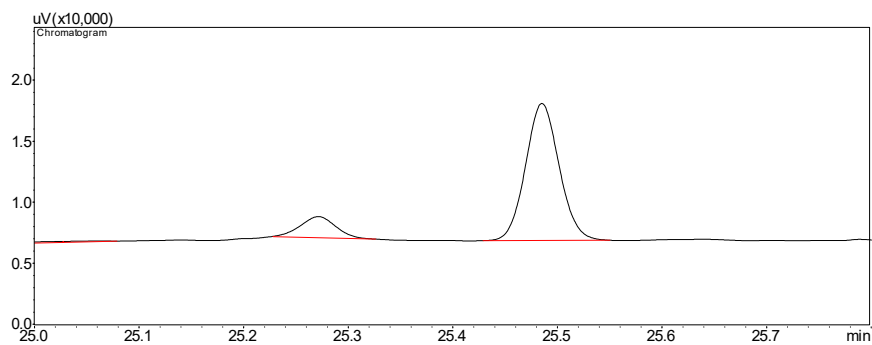

- Chiral GC analysis of racemic (Mb-H64A/V68G/I107L catalyzed protein reaction) **2c/3c** (*top*) and enzymatically produced **2c** (using Mb(F43L, H64A, V68G, I107V); *middle*) and **3c** product (using Mb(F43Y,H64A,V68G,I107F); *bottom*):

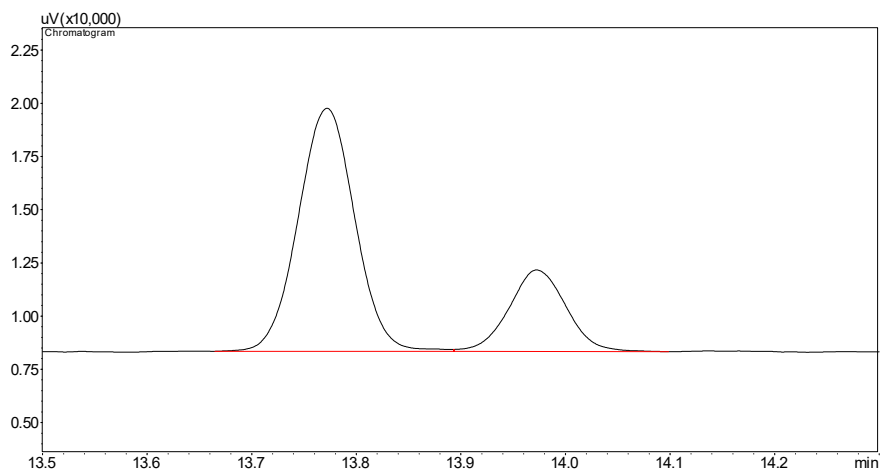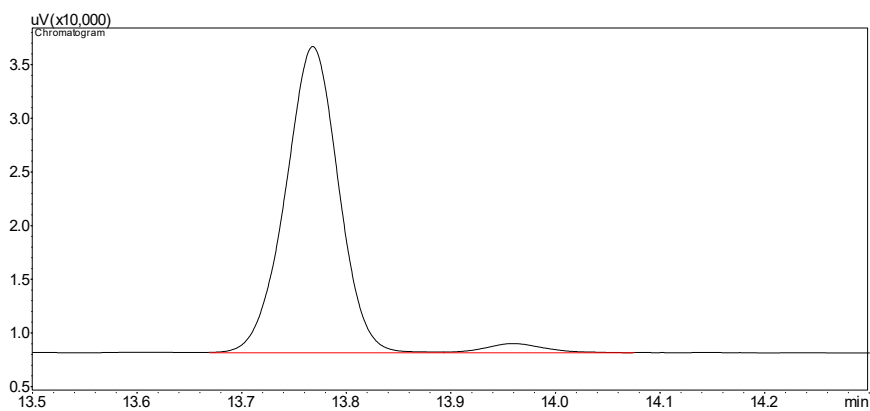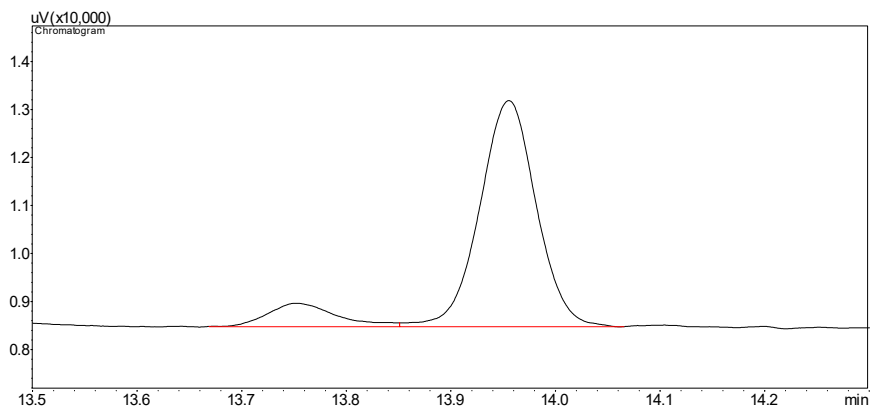



- Chiral GC analysis of racemic (Mb-H64A/V68G/I107L catalyzed protein reaction) **2d/3d** (*top*) and enzymatically produced **2d** (using Mb(F43L, H64A, V68G, I107L); *middle*) and **3d** product (using Mb(F43Y, H64A, V68G, I107F); *bottom*):

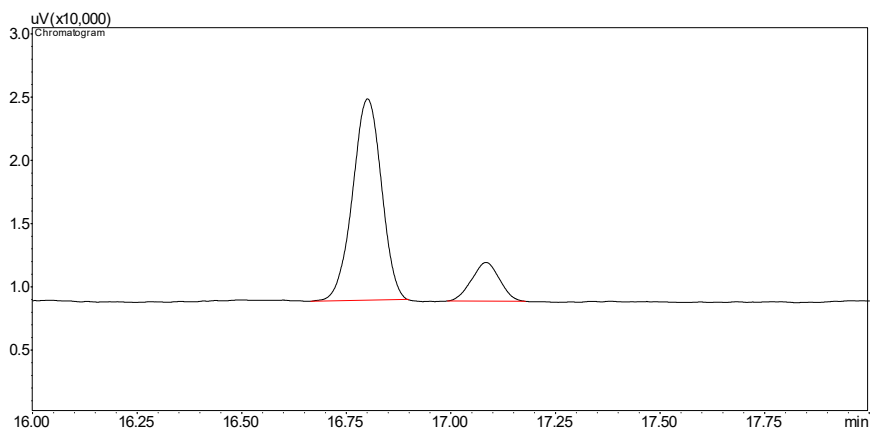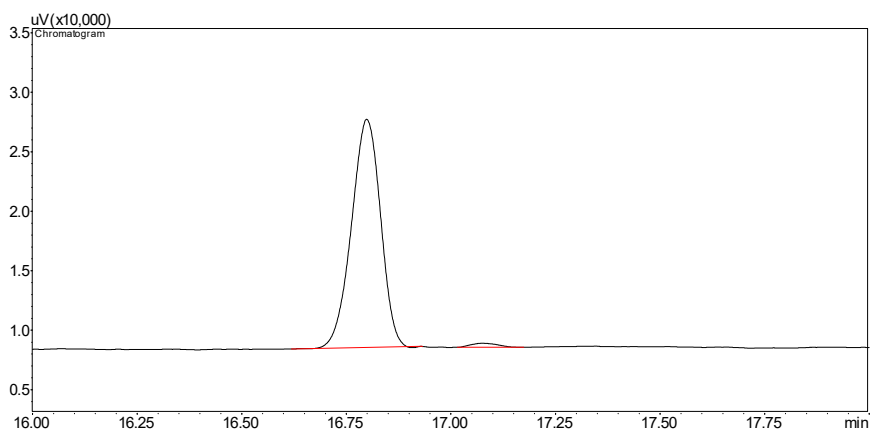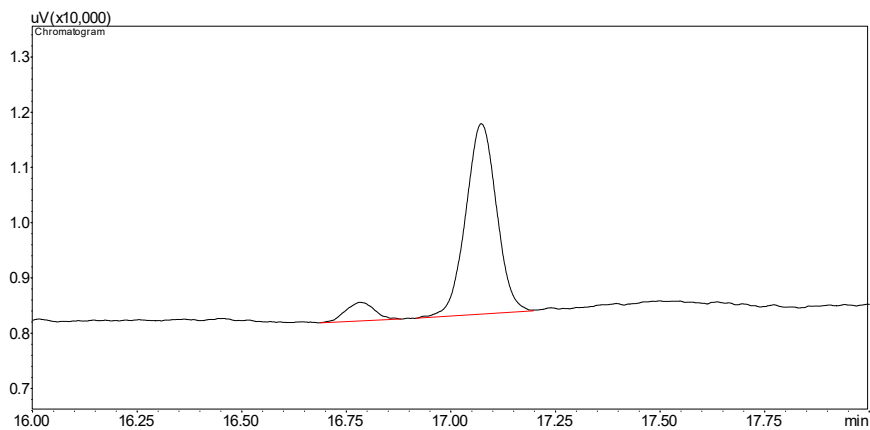

- Chiral GC analysis of racemic (Mb-H64A/V68G/I107F catalyzed protein reaction) **2e/3e** (*top*) and enzymatically produced **2e** (using Mb(F43L, H64A, V68G, I107L); *middle*) and **3e** product (using Mb(F43Y,H64A,V68G,I107F); *bottom*):

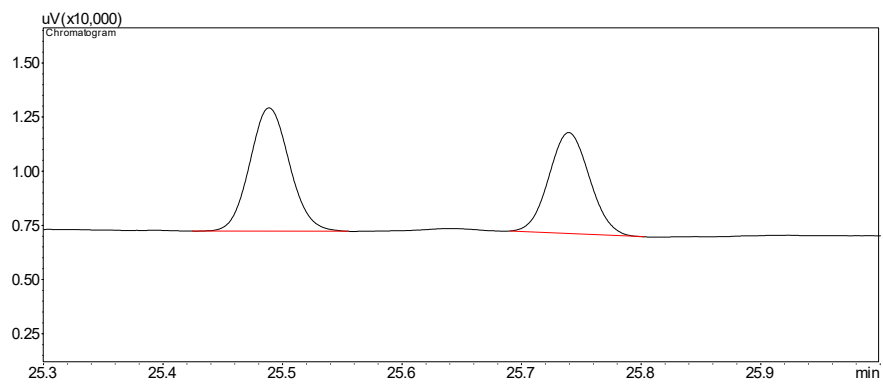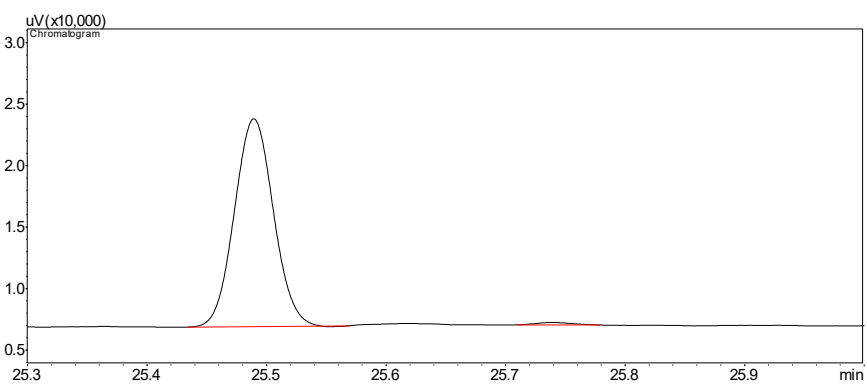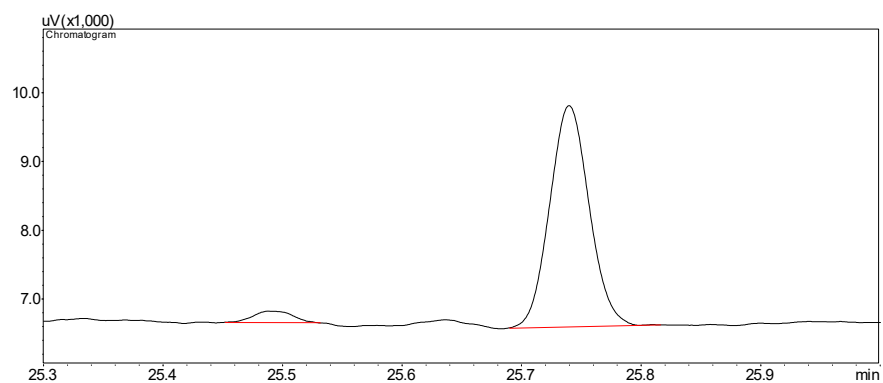

- Chiral GC analysis of racemic (Mb-H64A/V68G/I107L catalyzed protein reaction) **2f/3f** (*top*) and enzymatically produced **2f** (using Mb(F43L, H64A, V68G, I107L); *middle*) and **3f** product (using Mb(F43Y, H64A, V68G, I107F); *bottom*):

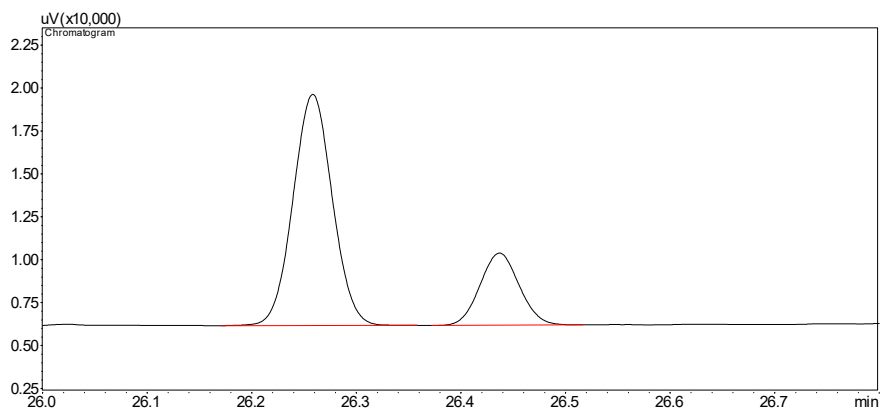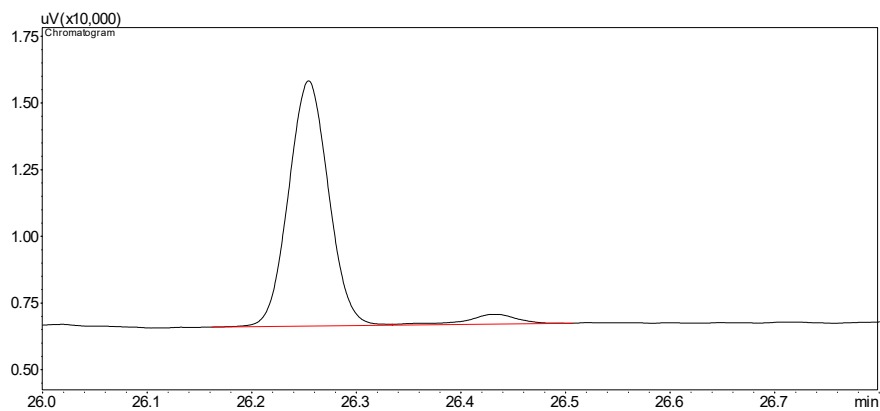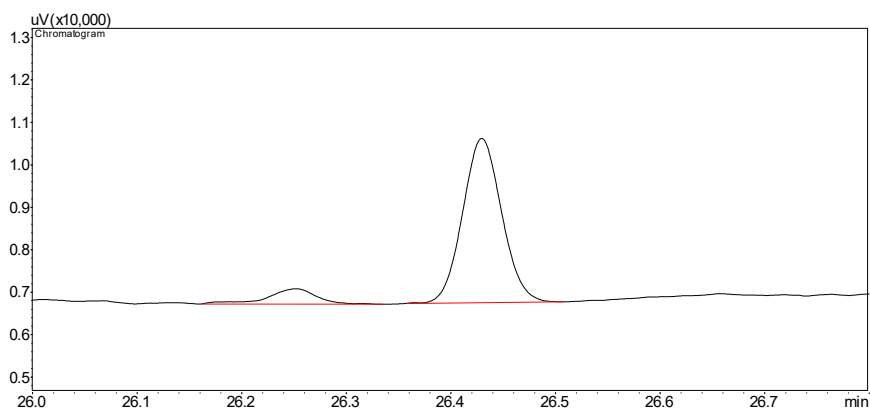

- Chiral GC analysis of racemic (Mb-H64A/V68G/I107V catalyzed protein reaction) **2g/3g** (*top*) and enzymatically produced **2g** (using Mb(F43L, H64A, V68G, I107L); *middle*) and **3g** product (using Mb(F43Y, H64A, V68G, I107F); *bottom*):

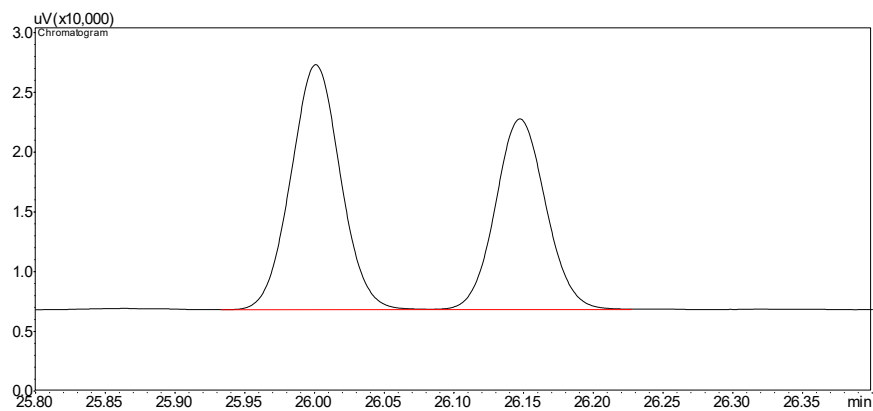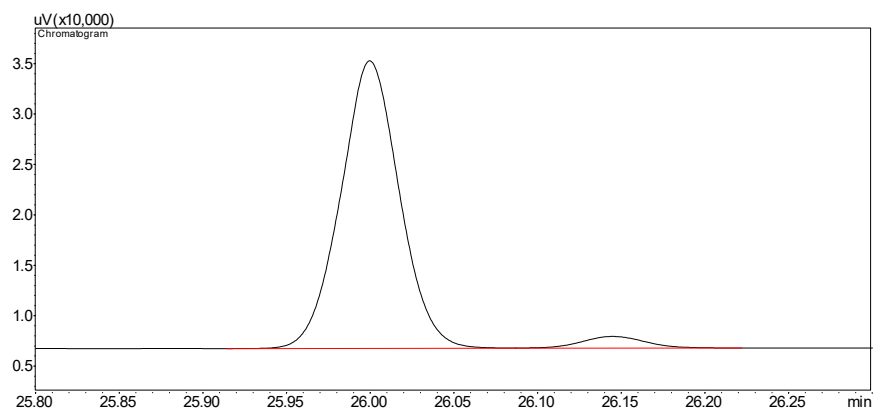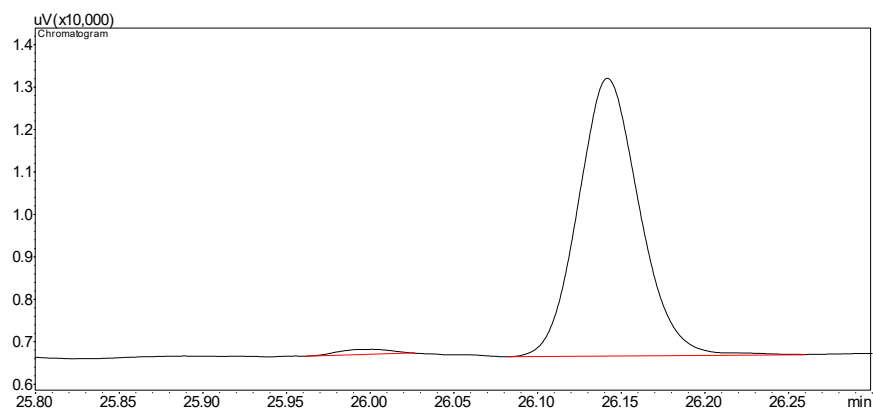

- Chiral GC analysis of racemic (Mb-H64A/V68G/I107L catalyzed protein reaction) **2h/3h** (*top*) and enzymatically produced **2h** (using Mb(F43L, H64A, V68G, I107L); *middle*) and **3h** product (using Mb(F43Y, H64A, V68G, I107F); *bottom*):

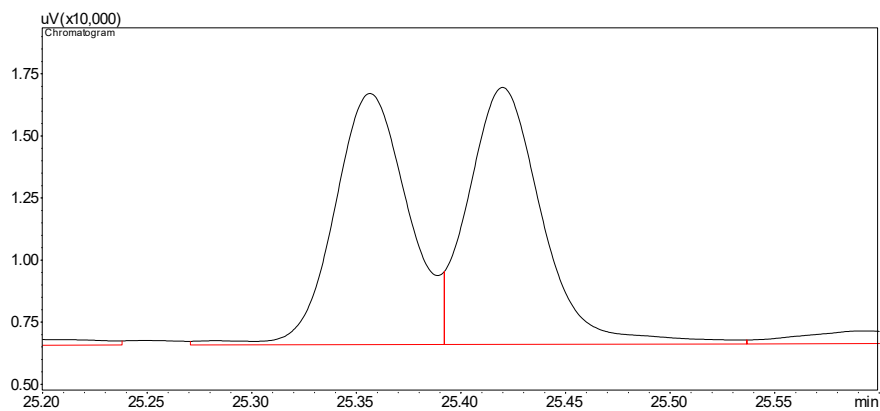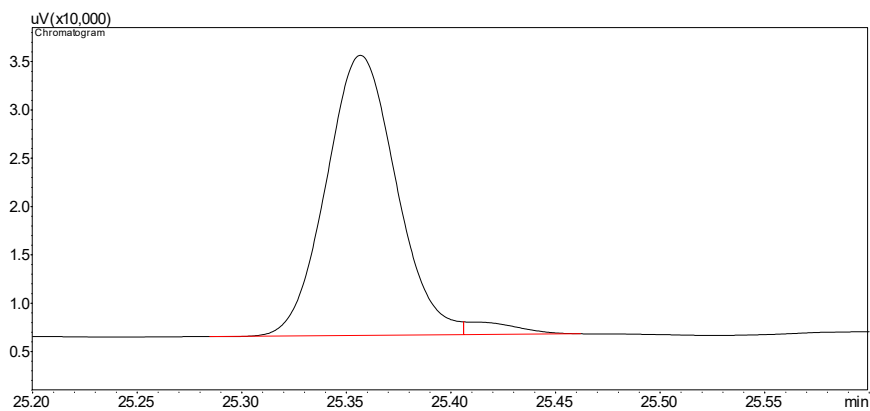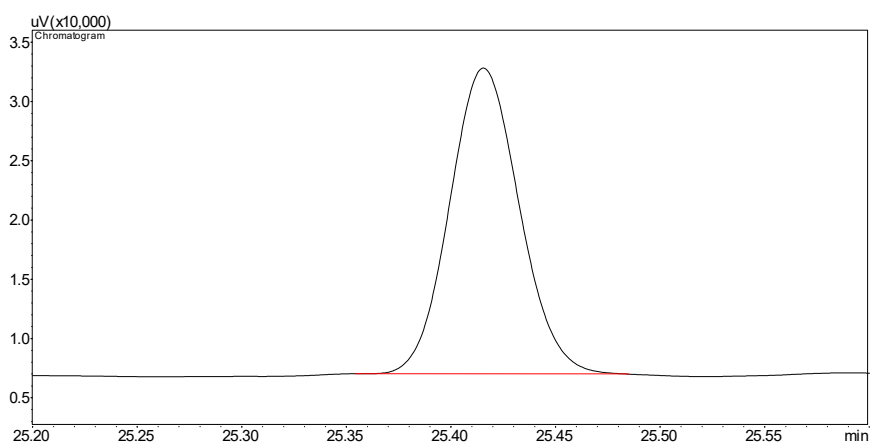

- Chiral GC analysis of racemic (Mb-H64A/V68G/I107V catalyzed protein reaction) **2i/3i** (*top*) and enzymatically produced **2i** (using Mb(F43L, H64A, V68G, I107L); *middle*) and **3i** product (using Mb(F43Y, H64A, V68G, I107F); *bottom*):

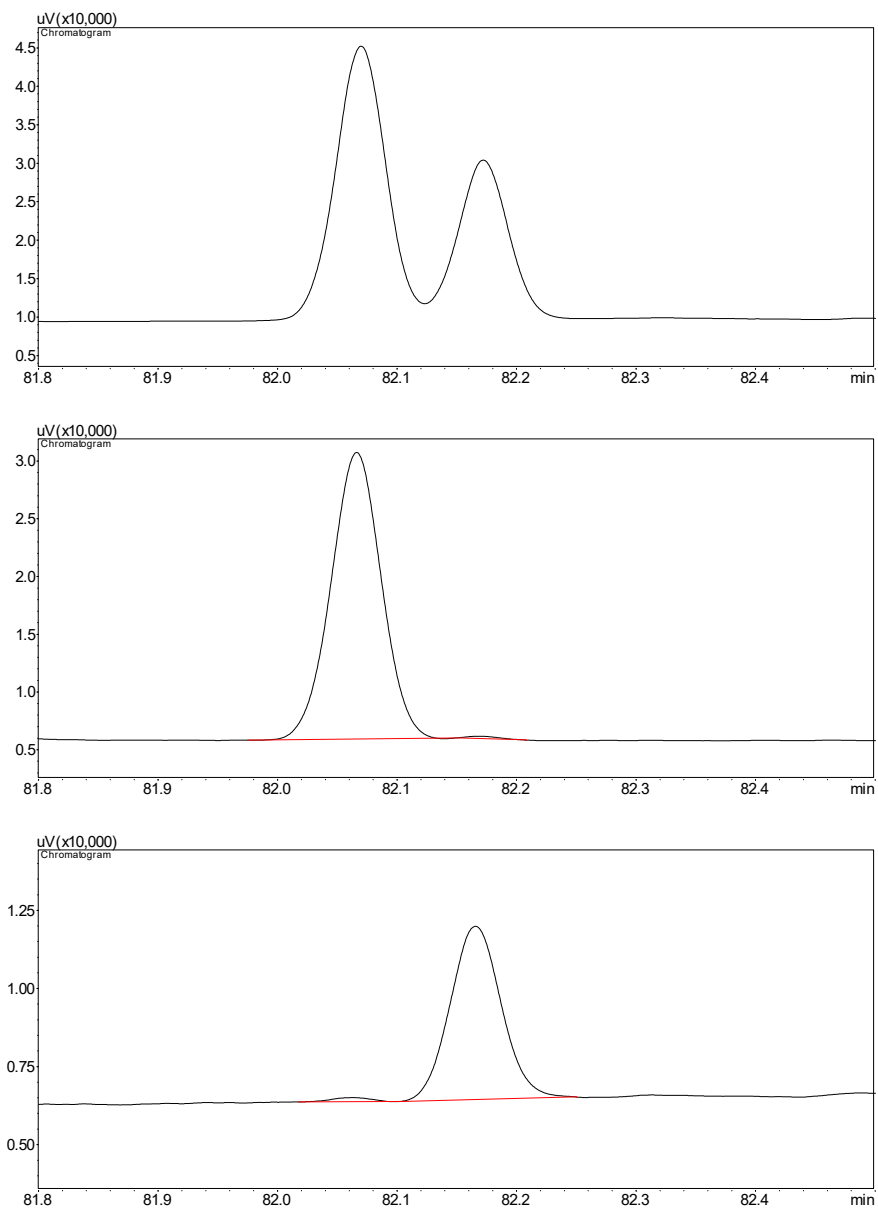

- Chiral GC analysis of racemic (Mb-H64W/V68G/I107F catalyzed protein reaction) **2j/3j** (*top*) and enzymatically produced **2j** (using Mb(F43L, H64A, V68G, I107L); *middle*) and **3j** product (using Mb(F43Y, H64A, V68G, I107F); *bottom*):

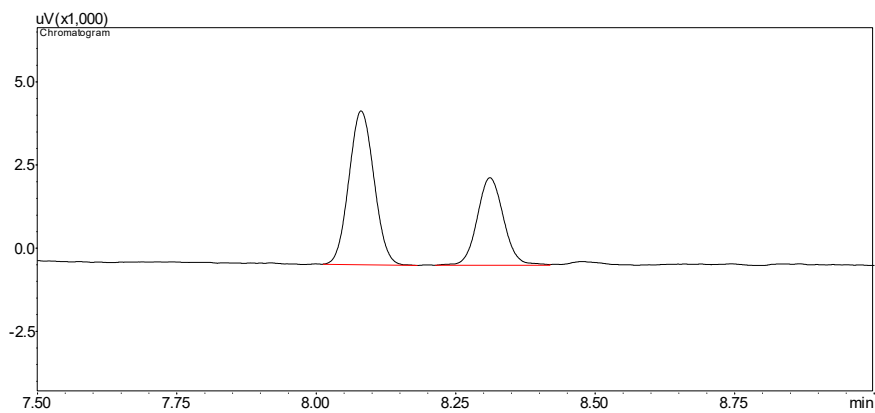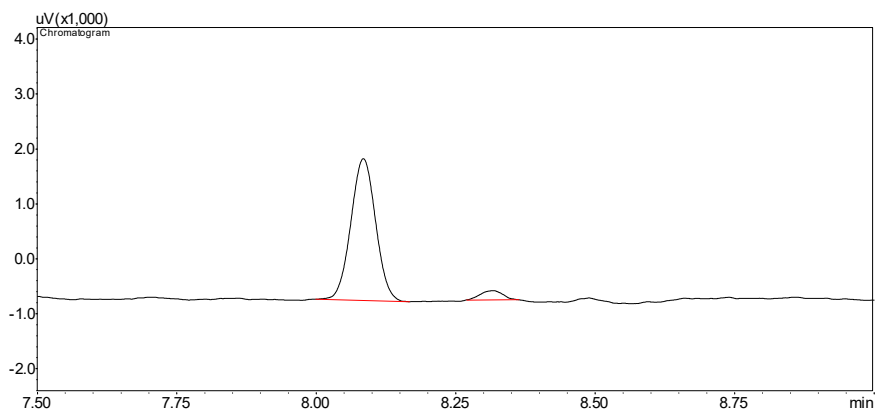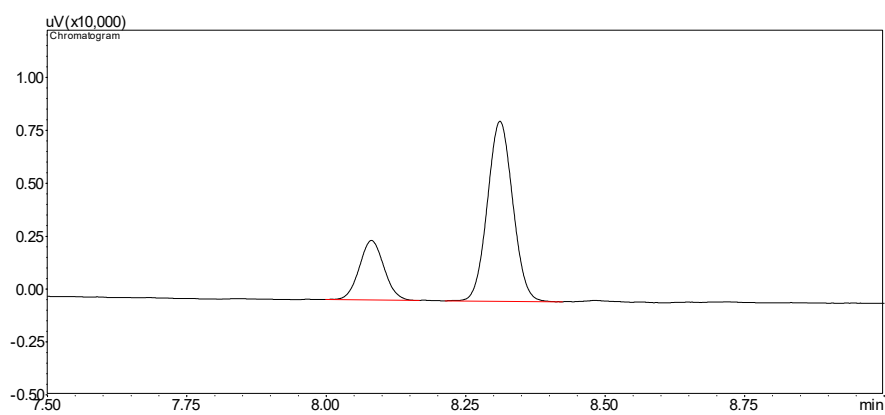

**Figure S3.** ORTEP of (1*S*,6*S*,7*S*)-7-(4-(trifluoromethyl)phenyl)-3-oxabicyclo[4.1.0]heptan-2-one (**2e**) with ellipsoids drawn at the 50% probability level. Hydrogen atoms were located in the difference Fourier map and refined freely. They are represented here as spheres of arbitrary radius for clarity.

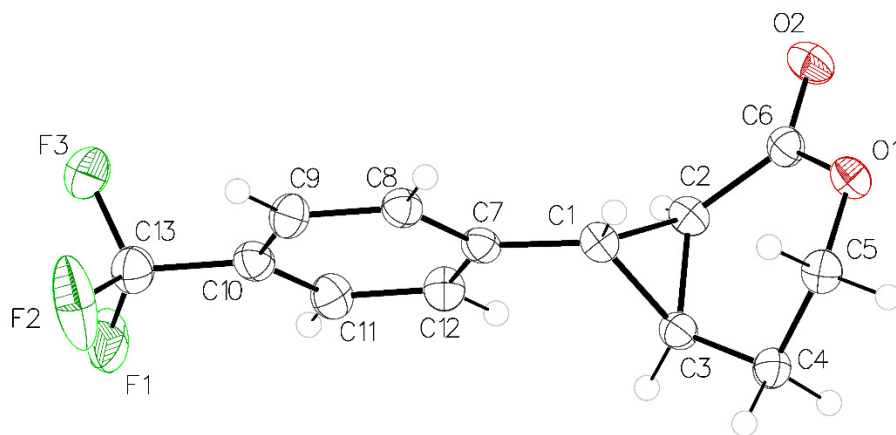

**Figure S4.** ORTEP of (1*S*,6*S*,7*S*)-7-(2-methoxyphenyl)-3-oxabicyclo[4.1.0]heptan-2-one (**2i**) with ellipsoids drawn at the 50% probability level. Hydrogen atoms were located in the difference Fourier map and refined freely. They are represented here as spheres of arbitrary radius for clarity.

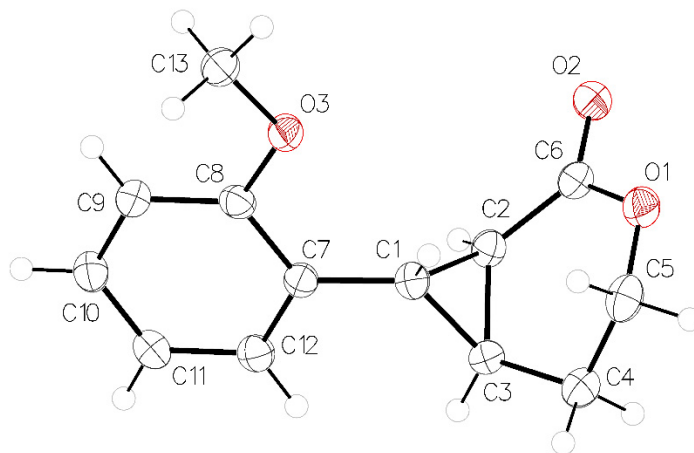



## Experimental Procedures

### General Information

All chemicals and reagents were purchased from commercial suppliers (Sigma-Aldrich, AK Scientific, Alfa Aesar, TCI, Acros) and used without any further purification, unless otherwise stated.  $^1\text{H}$ , and  $^{13}\text{C}$  NMR spectra were measured on a Bruker DPX-500 instrument (operating at 500 MHz for  $^1\text{H}$  and 125 MHz for  $^{13}\text{C}$ ). Tetramethylsilane (TMS) served as the internal standard (0 ppm) for  $^1\text{H}$  NMR and  $\text{CDCl}_3$  was used as the internal standard (77.0 ppm) for  $^{13}\text{C}$  NMR. Flash column chromatography purification was carried out using AMD Silica Gel 60 Å 230-400 mesh or Alumina, (Fisher adsorption) 80-200 mesh. Thin Layer Chromatography (TLC) was carried out using Merck Millipore TLC silica gel 60 F254 glass plates.

### Protein Expression

Cloning procedures of the Mb variants investigated in this work were described previously.<sup>1,2</sup> The oligonucleotides used for site saturation mutagenesis are shown in **Table S6**. The Mb variants were expressed in *E. coli* BL21(DE3) or C41(DE3) cells as follows. After transformation, cells were grown in TB medium (ampicillin, 100 mg L<sup>-1</sup>) at 37 °C (200 rpm) until OD<sub>600</sub> reached 0.6. Cells were then induced with 0.25 mM isopropyl- $\beta$ -D-1-thiogalactopyranoside (IPTG) and 0.3 mM  $\delta$ -aminolevulinic acid (ALA). After induction, cultures were shaken at 180 rpm and 27 °C and harvested after 20 h by centrifugation at 4,000 rpm at 4 °C. Myoglobin concentration was determined after cell lysis by sonication, followed by CO-binding assay using an extinction coefficient  $\epsilon_{424} = 187 \text{ mM}^{-1}\text{cm}^{-1}$ .

### Protein engineering

The protein evolution was conducted through iterative rounds of site saturation mutagenesis. In each round, the site-saturation library of Mb variants was constructed and transformed into *E. coli* DH5 $\alpha$  cells. The colonies were collected in LB medium (ampicillin, 100 mg L<sup>-1</sup>) and plasmids were extracted by QIAprep Spin Miniprep Kit. The library coverage was assessed by DNA sequencing. The library of Mb variants was then transformed into *E. coli* DH5 $\alpha$  cells and expressed in 96-well plates under the conditions described above. After expression, the cells were pelleted by centrifuge and resuspended in potassium phosphate buffer (50 mM, pH 7).

The reactions were carried out by adding the substrate to each well of the plate and by shaking the plates for 5 hours at room temperature in an anaerobic chamber. The reactions mixtures were extracted by DCM and analyzed by chiral GC-FID. The Mb variant that showed improved activity and enantioselectivity was sequenced and used as template for next round of mutagenesis and screening.

## Synthetic Procedures:

### Synthesis of *trans*-homoallylic diazoacetates:

All diazo-compounds were synthesized by the following procedures. Firstly, benzaldehyde substrates were reacted with 2-carboxyethyl triphenylphosphonium bromide to form *trans*-styrylacetic acids as major products. The acids then underwent esterification and reduction to give the corresponding alcohols, which were converted to *trans*-homoallylic diazoacetates by the reported procedures.

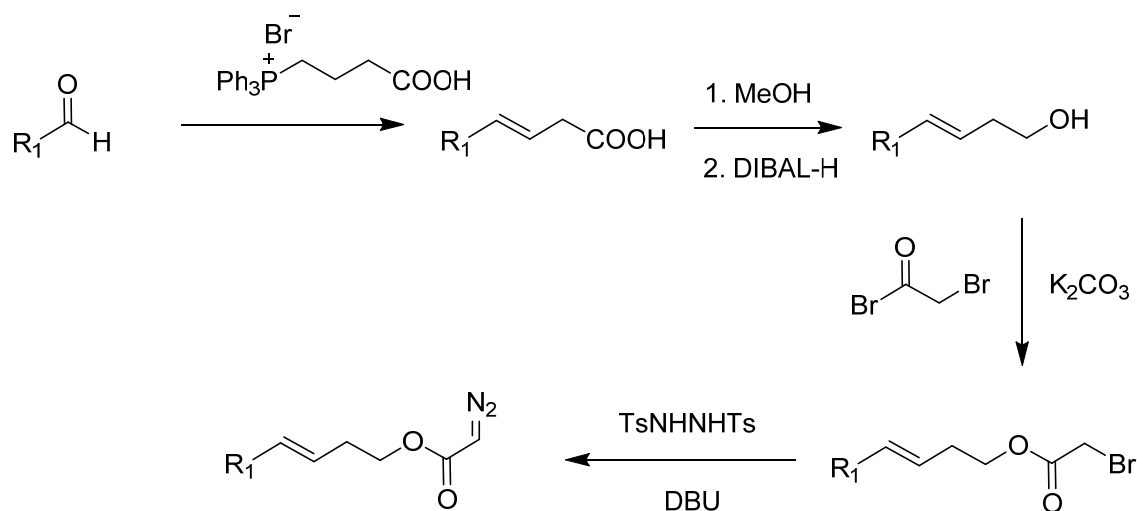

### General Procedure A: Synthesis of *trans*-styrylacetic acid from benzaldehyde (Wittig reaction):

To a solution of (2-carboxyethyl)triphenylphosphonium bromide (2.7g, 6.6 mmol, 1.1 eq.) in tetrahydrofuran (20 ml), a solution of sodium bis(trimethylsilyl)amide (1.0 M in tetrahydrofuran,

13.2 ml, 13.2 mmol, 2.2 eq.) was added slowly under argon in ice bath. The solution was stirred for 30 min, then cooled to  $-78\text{ }^{\circ}\text{C}$ . Benzaldehyde (6 mmol, 1 eq.) was then added slowly and stirred overnight. The reaction mixture was warmed up to room temperature prior to the addition of water and diethyl ether. The aqueous layer was washed with ethyl acetate three times and subsequently was acidified with 1 M hydrochloric acid to pH =1, which was then extracted three times with ethyl acetate. The combined organic layer was dried over  $\text{MgSO}_4$ , filtered and concentrated in *vacuo*. The crude product was used in the next step without further purification.

### **General Procedure B: Synthesis of *trans*-homoallylic alcohol from carboxylic acid**

To a solution of *trans*-homoallylic carboxylic acid (1.0 equiv) in methanol, conc.  $\text{H}_2\text{SO}_4$  solution was added slowly. The reaction was heated under reflux for 5 h, then was cooled to room temperature and concentrated in *vacuo*. The residue was neutralized with saturated  $\text{NaHCO}_3$  aqueous solution, extracted with ethyl acetate three times. The combined organic layer was then washed with brine, dried over  $\text{MgSO}_4$ , filtered, and concentrated in *vacuo* to obtain the homoallylic ester which was used in next step without any further purification.

To a solution of the homoallylic ester (1.0 equiv) in dry DCM at  $-78\text{ }^{\circ}\text{C}$  under argon, DIBAL-H (1.0 M in hexane, 2.3 equiv) was added in dropwise. The reaction was stirred at  $-78\text{ }^{\circ}\text{C}$  until the reaction was completed (2-6 h). The reaction mixture was diluted with 1 M HCl and then warmed to room temperature and stirred overnight. The aqueous layer was extracted with DCM three times. The combined organic phase was washed with 1 M HCl, sat.  $\text{NaHCO}_3$  solution and brine, dried over  $\text{MgSO}_4$ , filtered and concentrated in *vacuo* to afford *trans*-homoallylic alcohol.

### **General Procedure C: Synthesis of *trans*-homoallylic diazoacetate from *trans*-homoallylic alcohol:**

To a solution of *trans*-homoallylic alcohol (3 mmol) and  $\text{K}_2\text{CO}_3$  (2.08 g, 15 mmol) in DCM (15.0 mL), bromoacetyl bromide (780  $\mu\text{l}$ , 9 mmol) was added slowly at  $0\text{ }^{\circ}\text{C}$  and stirred for 30 min. The reaction mixture was quenched with  $\text{H}_2\text{O}$  and extracted with DCM three times. The organic phase was washed with brine and dried over  $\text{MgSO}_4$ . The solvent was removed in *vacuo* and the obtained bromoacetate residue was used in the next step without any future purification. To the solution of the resulting bromoacetate and  $N,N$ -ditosylhydrazine (2.04 g, 6.0 mmol) in THF (15.0 mL), DBU (2.28 mL, 15 mmol) was added dropwise at  $0\text{ }^{\circ}\text{C}$  and stirred for 30 min. Reaction was quenched

by aqueous saturated solution of NaHCO<sub>3</sub>. Reaction mixture was extracted with Et<sub>2</sub>O three times. The organic phase was washed with brine, dried over MgSO<sub>4</sub> and evaporated to give crude diazoacetate. The crude product was purified by column chromatography on silica gel with ethyl acetate/hexanes to afford the desired *trans*-homoallylic diazoacetate product.

#### **General Procedure D: Biocatalytic intramolecular cyclopropanation reactions using whole cells expressing myoglobin on preparative scale:**

These reactions were carried out on a 80 mL-scale using Mb(F43L,H64A,V68G,I107V) (otherwise mentioned) expressing *E. coli* cells, 2.5 mM of diazoacetate. In a typical procedure, the homoallylic diazoacetate (0.2 mmol in 1 mL of ethanol) was added slowly to a 125 mL Erlenmeyer flask containing a suspension of Mb-expressing cells (OD<sub>600</sub> = 20 in KPi, pH 7) under argon pressure, equipped with a magnetic stir bar and sealed with a rubber septum. Reaction mixture stirred at room temperature for 3-5 hours. The reaction mixtures were extracted with ethyl acetate (80 mL x 3) and the combined organic layers were dried over MgSO<sub>4</sub> and concentrated under reduced pressure. The TON for the whole-cell reactions were calculated based on Mb concentration in the reaction mixture as measured via UV-vis spectroscopy using the CO-binding assay ( $\epsilon_{424} = 187 \text{ mM}^{-1}\text{cm}^{-1}$ ) after cell lysis. The crude product was purified by flash column chromatography using silica gel and ethyl acetate/hexanes as the eluent to isolate the intramolecular cyclopropanation product. The purified product was characterized by NMR, GC-MS, and chiral SFC or GC for stereoselectivity determination and they were used as authentic standards for the construction of the calibration curves (TON and % conversion determination).

#### **General Procedure E: Synthesis of racemic standards by Engineered Mb variants.**

Under standard reaction conditions, 500  $\mu\text{L}$  scale reactions were carried out using 20  $\mu\text{M}$  engineered Mb variant, 2.5 mM diazoacetate, and 10 mM sodium dithionite. In a typical procedure, a solution containing Mb in potassium phosphate buffer (50 mM, pH 7.0) with sodium dithionite was prepared in an anaerobic chamber. Reactions were initiated by addition of 10  $\mu\text{L}$  of diazoacetate from 0.5 M stock solutions, and the reaction mixtures were stirred in the chamber for 12 h at room temperature. Reaction mixtures were extracted by using DCM and used for analysis.

## Reaction Analysis

The reactions were analyzed by adding 25  $\mu\text{L}$  of internal standard (benzodioxole, 50 mM in methanol) to a 500  $\mu\text{L}$  aliquot of the reaction mixture, followed by extraction with 500  $\mu\text{L}$  dichloromethane (DCM) and centrifugation at 14,000 rpm. The organic layer was collected and analyzed by SFC or GC-FID. The TON for the whole-cell reactions were calculated based on Mb concentration in the reaction mixture as measured via UV-vis using the CO-binding assay ( $\epsilon_{424} = 187 \text{ mM}^{-1}\text{cm}^{-1}$ ) after cell lysis. Calibration curves of the different intramolecular cyclopropane products were constructed using authentic standards from the whole cell reactions (procedure F). Enantioselectivity was determined by using SFC or GC-FID using a chiral column as described below.

## Analytical Methods

Gas chromatography (GC) analysis were carried out using a Shimadzu GC-2010 gas chromatograph equipped with a FID detector, and a Cyclosil-B column (30 m x 0.25 mm x 0.25  $\mu\text{m}$  film). The following GC methods were used for TON analysis and stereoisomer separation (% *ee* analysis), 1  $\mu\text{L}$  injection, injector temp.: 200  $^{\circ}\text{C}$ , detector temp: 300  $^{\circ}\text{C}$ .

Gradient for method A: column temperature set at 140  $^{\circ}\text{C}$  for 3 min, then to 160  $^{\circ}\text{C}$  at 1.8  $^{\circ}\text{C}/\text{min}$ , then to 165  $^{\circ}\text{C}$  at 1.0  $^{\circ}\text{C}/\text{min}$ , then to 245 at 25  $^{\circ}\text{C}/\text{min}$ , then 245  $^{\circ}\text{C}$  for 6 min. Total run time was 28 min.

Gradient for method B: column temperature set at 160 $^{\circ}\text{C}$  for 2 min, then to 245  $^{\circ}\text{C}$  at 7  $^{\circ}\text{C}/\text{min}$ , 245  $^{\circ}\text{C}$  hold for 8 min. Total run time was 22 min.

Gradient for method C: column temperature set at 100 $^{\circ}\text{C}$  for 3 min, then to 140  $^{\circ}\text{C}$  at 0.4  $^{\circ}\text{C}/\text{min}$  then to 245  $^{\circ}\text{C}$  at 25  $^{\circ}\text{C}/\text{min}$ , 245  $^{\circ}\text{C}$  hold for 2 min. Total run time was 109 min.

**Table S7.** Enantiomer resolution via chiral GC analysis.

| Product | Method | $t_{\text{R}}$ for 1 <sup>st</sup> isomer (min) | $t_{\text{R}}$ for 2 <sup>nd</sup> isomer (min) |
|---------|--------|-------------------------------------------------|-------------------------------------------------|
| 2a/3a   | A      | 24.61                                           | 24.74                                           |
| 2b/3b   | A      | 25.28                                           | 25.49                                           |
| 2c/3c   | B      | 13.78                                           | 13.99                                           |

|              |   |       |       |
|--------------|---|-------|-------|
| <b>2d/3d</b> | B | 16.79 | 17.10 |
| <b>2e/3e</b> | A | 25.49 | 25.74 |
| <b>2f/3f</b> | A | 26.25 | 26.43 |
| <b>2g/3g</b> | A | 26.01 | 26.15 |
| <b>2h/3h</b> | A | 25.36 | 25.42 |
| <b>2i/3i</b> | C | 82.07 | 82.18 |
| <b>2j/3j</b> | A | 8.05  | 8.31  |

## Compound Characterization Data

### (E)-4-phenylbut-3-en-1-yl 2-diazoacetate (**1a**):

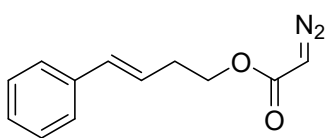

(E)-4-phenylbut-3-en-1-yl 2-diazoacetate (**1a**) was prepared according to the general procedure for the synthesis of *trans*-homoallylic diazoacetate. Reaction mixture was purified by silica gel column chromatography with 10% EtOAc/hexanes as an eluent to give the desired product as pale-yellow liquid.  $^1\text{H}$  NMR (500 MHz,  $\text{CDCl}_3$ )  $\delta$  7.46 – 7.11 (m, 5H), 6.48 (d,  $J = 15.9$  Hz, 1H), 6.17 (dt,  $J = 15.9, 6.8$  Hz, 1H), 4.75 (s, 1H), 4.29 (t,  $J = 6.7$  Hz, 2H), 2.57 (dt,  $J = 6.8, 6.3$  Hz, 2H).  $^{13}\text{C}$  NMR (126 MHz,  $\text{CDCl}_3$ )  $\delta$  137.4, 132.7, 128.7, 127.5, 126.2, 125.5, 64.2, 46.3, 32.7. Carbonyl carbon is not observed.

### (E)-4-(4-fluorophenyl)but-3-en-1-yl 2-diazoacetate (**1b**):

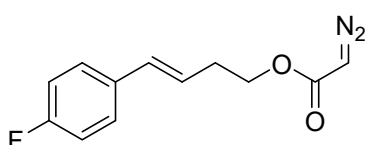

(E)-4-(4-fluorophenyl)but-3-en-1-yl 2-diazoacetate (**1b**) was prepared according to the general procedure for the synthesis of *trans*-homoallylic diazoacetate. Reaction mixture was purified by silica gel column chromatography with 10% EtOAc/hexanes as an eluent to give the desired product as pale-yellow liquid.  $^1\text{H}$  NMR (500 MHz,  $\text{CDCl}_3$ )  $\delta$  7.47 – 7.23 (m, 2H), 7.11 – 6.92 (m, 2H), 6.43 (d,  $J = 15.7$  Hz, 1H), 6.07 (dt,  $J = 15.7, 6.8$  Hz, 1H), 4.75 (s, 1H), 4.27 (t,  $J = 6.7$  Hz, 2H), 2.55 (dt,  $J = 6.8$  Hz, 2H).  $^{13}\text{C}$  NMR (126 MHz,  $\text{CDCl}_3$ ) 133.5, 131.5, 127.7 (d,  $J = 4.57$  Hz), 125.3, 115.6 (d,  $J = 20.1$  Hz), 64.1, 46.4, 32.7. Carbonyl carbon and F-C\* carbon are not observed.  $^{19}\text{F}$  NMR (376 MHz,  $\text{CDCl}_3$ )  $\delta$  -113.2.

### (E)-4-(4-chlorophenyl)but-3-en-1-yl 2-diazoacetate (**1c**):

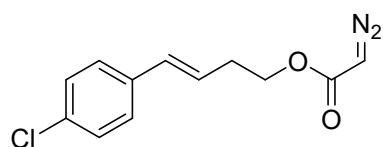

(E)-4-(4-chlorophenyl)but-3-en-1-yl 2-diazoacetate (**1c**) was prepared according to the general procedure for the synthesis of *trans*-homoallylic diazoacetate. Reaction mixture was purified by silica gel column chromatography with 10% EtOAc/hexanes as an eluent to give the desired product as pale-yellow liquid.  $^1\text{H}$  NMR (500 MHz,  $\text{CDCl}_3$ )  $\delta$  7.29 (s, 4H), 6.43 (d,  $J = 15.9$  Hz, 1H), 6.12 (dt,  $J = 15.9, 7.2$  Hz, 1H), 4.74 (s, 1H), 4.27 (t,  $J = 6.7$  Hz, 2H), 2.54 (dt,  $J = 7.2, 6.7$  Hz, 2H).  $^{13}\text{C}$  NMR (126 MHz,  $\text{CDCl}_3$ )  $\delta$  133.1, 131.5, 128.8, 127.5, 126.3, 64.0, 46.4, 32.7. Carbonyl carbon is not observed.

**(E)-4-(4-bromophenyl)but-3-en-1-yl 2-diazoacetate (1d):**

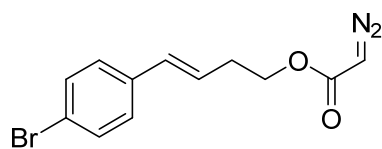

(E)-4-(4-bromophenyl)but-3-en-1-yl 2-diazoacetate (**1d**) was prepared according to the general procedure for the synthesis of *trans*-homoallylic diazoacetate. Reaction mixture was purified by silica gel column chromatography with 10% EtOAc/hexanes as an eluent to give the desired product as pale-yellow liquid. <sup>1</sup>H NMR (400 MHz, CDCl<sub>3</sub>) δ 7.42 (d, *J* = 8.4 Hz, 2H), 7.20 (d, *J* = 8.4 Hz, 2H), 6.40 (d, *J* = 15.9 Hz, 1H), 6.15 (dt, *J* = 15.9, 6.7 Hz, 1H), 4.75 (s, 1H), 4.28 (t, *J* = 6.6 Hz, 2H), 2.55 (dt, *J* = 6.6 Hz, 2H). <sup>13</sup>C NMR (101 MHz, CDCl<sub>3</sub>) δ 136.3, 131.8, 131.5, 127.8, 126.4, 121.1, 63.9, 46.3, 32.7.

**(E)-4-(4-(trifluoromethyl)phenyl)but-3-en-1-yl 2-diazoacetate (1e):**

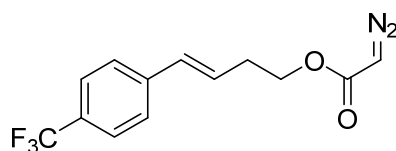

(E)-4-(4-(trifluoromethyl)phenyl)but-3-en-1-yl 2-diazoacetate (**1e**) was prepared according to the general procedure for the synthesis of *trans*-homoallylic diazoacetate. Reaction mixture was purified by silica gel column chromatography with 10% EtOAc/hexanes as an eluent to give the desired product as yellow liquid. <sup>1</sup>H NMR (400 MHz, CDCl<sub>3</sub>) δ 7.55 (d, *J* = 8.1 Hz, 2H), 7.41 (d, *J* = 8.1 Hz, 2H), 6.50 (d, *J* = 15.9 Hz, 1H), 6.27 (dt, *J* = 15.9, 6.9 Hz, 1H), 4.75 (s, 1H), 4.30 (t, *J* = 6.6 Hz, 2H), 2.59 (dt, *J* = 6.6 Hz, 2H). <sup>13</sup>C NMR (101 MHz, CDCl<sub>3</sub>) δ 140.8, 133.5, 131.5, 129.2 (q, *J* = 34.64 Hz), 128.5, 126.4, 125.6 (q, *J* = 3.36 Hz), 124.4 (q, *J* = 270.64 Hz), 63.8, 46.4, 32.7. Carbonyl carbon is not observed. <sup>19</sup>F NMR (376 MHz, CDCl<sub>3</sub>) δ -63.3.

**(E)-4-(*p*-tolyl)but-3-en-1-yl 2-diazoacetate (1f):**

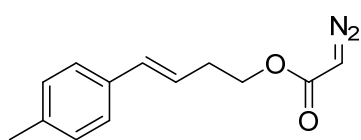

(E)-4-(*p*-tolyl)but-3-en-1-yl 2-diazoacetate (**1f**) was prepared according to the general procedure for the synthesis of *trans*-homoallylic diazoacetate. Reaction mixture was purified by silica gel column chromatography with 10% EtOAc/hexanes as an eluent to give the desired product as pale-yellow liquid. <sup>1</sup>H NMR (400 MHz, CDCl<sub>3</sub>) δ 7.25 (d, *J* = 8.0 Hz, 2H), 7.12 (d, *J* = 7.8 Hz, 2H), 6.44 (d, *J* = 15.8 Hz, 1H), 6.09 (dt, *J* = 15.8, 6.7 Hz, 1H), 4.75 (s, 1H), 4.27 (t, *J* = 6.7 Hz, 2H), 2.55 (dt, *J* = 6.7 Hz, 2H), 2.33 (s, 3H). <sup>13</sup>C NMR (101 MHz, CDCl<sub>3</sub>) δ 137.2, 134.6, 132.6, 129.4, 126.1, 124.4, 64.3, 46.4, 32.7, 21.3. Carbonyl carbon is not observed.



**(E)-4-(*m*-tolyl)but-3-en-1-yl 2-diazoacetate (1g):**

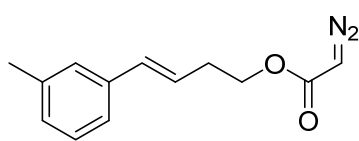

(E)-4-(*m*-tolyl)but-3-en-1-yl 2-diazoacetate (**1g**) was prepared according to the general procedure for the synthesis of *trans*-homoallylic diazoacetate. Reaction mixture was purified by silica gel column chromatography with 10% EtOAc/hexanes as an eluent to give the desired product as pale-yellow liquid. <sup>1</sup>H NMR (400 MHz, CDCl<sub>3</sub>) δ 7.25 – 7.01 (m, 4H), 6.46 (d, *J* = 15.8 Hz, 1H), 6.16 (dt, *J* = 15.8, 6.9 Hz, 1H), 4.76 (s, 1H), 4.29 (t, *J* = 6.6 Hz, 2H), 2.57 (dt, *J* = 6.6 Hz, 2H), 2.36 (s, 3H). <sup>13</sup>C NMR (101 MHz, CDCl<sub>3</sub>) δ 166.8, 138.2, 137.3, 132.7, 128.5, 128.2, 126.9, 125.2, 123.3, 64.2, 46.3, 32.7, 21.5.

**(E)-4-(*o*-tolyl)but-3-en-1-yl 2-diazoacetate (1h):**

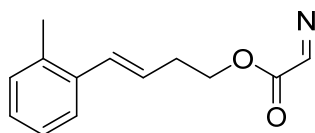

(E)-4-(*o*-tolyl)but-3-en-1-yl 2-diazoacetate (**1h**) was prepared according to the general procedure for the synthesis of *trans*-homoallylic diazoacetate. Reaction mixture was purified by silica gel column chromatography with 10% EtOAc/hexanes as an eluent to give the desired product as pale-yellow liquid. <sup>1</sup>H NMR (400 MHz, CDCl<sub>3</sub>) δ 7.45 – 7.35 (m, 1H), 7.21 – 7.08 (m, 3H), 6.67 (d, *J* = 15.6 Hz, 1H), 6.03 (dt, *J* = 15.7, 7.0 Hz, 1H), 4.74 (s, 1H), 4.30 (t, *J* = 6.7 Hz, 2H), 2.58 (dt, *J* = 6.7 Hz, 2H), 2.33 (s, 3H). <sup>13</sup>C NMR (101 MHz, CDCl<sub>3</sub>) δ 136.6, 135.2, 130.7, 130.3, 127.4, 126.9, 126.2, 125.8, 64.2, 46.3, 33.0, 19.9. Carbonyl carbon is not observed

**(E)-4-(2-methoxyphenyl)but-3-en-1-yl 2-diazoacetate (1i):**

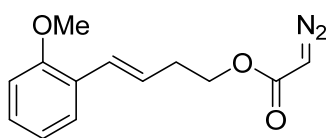

(E)-4-(2-methoxyphenyl)but-3-en-1-yl 2-diazoacetate (**1i**) was prepared according to the general procedure for the synthesis of *trans*-homoallylic diazoacetate. Reaction mixture was purified by silica gel column chromatography with 10% EtOAc/hexanes as an eluent to give the desired product as pale-yellow liquid. <sup>1</sup>H NMR (400 MHz, CDCl<sub>3</sub>) δ 7.40 (d, *J* = 7.4 Hz, 1H), 7.21 (t, *J* = 7.6 Hz, 1H), 6.92 (t, *J* = 7.2 Hz, 1H), 6.86 (d, *J* = 8.2 Hz, 1H), 6.79 (d, *J* = 15.9 Hz, 1H), 6.16 (dt, *J* = 15.9, 7.0 Hz, 1H), 4.74 (s, 1H), 4.29 (t, *J* = 6.6 Hz, 2H), 3.84 (s, 3H), 2.58 (dt, *J* = 6.6 Hz, 2H). <sup>13</sup>C NMR (101 MHz, CDCl<sub>3</sub>) δ 166.9, 156.6, 139.2, 128.5, 127.5, 126.8, 126.1, 120.8, 110.9, 64.4, 55.6, 33.1, 31.7.

#### 4-methylpent-3-en-1-yl 2-diazoacetate (**1J**):

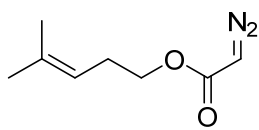

4-methylpent-3-en-1-yl 2-diazoacetate (**1J**) was prepared from hydroxylation of 5-bromo-2-methyl-2-pentene, then the general procedure C for the synthesis of diazoacetate. Reaction mixture was purified by silica gel column chromatography with 10% EtOAc/hexanes as an eluent to give the desired product as pale-yellow. <sup>1</sup>H NMR (400 MHz, CDCl<sub>3</sub>) δ 5.09 (t, *J* = 7.2 Hz, 1H), 4.73 (s, 1H), 4.12 (t, *J* = 7.0 Hz, 2H), 2.33 (dt, *J* = 7.0 Hz, 2H), 1.71 (s, 3H), 1.63 (s, 3H). <sup>13</sup>C NMR (101 MHz, CDCl<sub>3</sub>) δ 134.9, 119.2, 64.7, 46.3, 27.9, 25.9, 17.9. Carbonyl carbon is not observed.

#### Data for the intramolecular cyclopropanation product synthesizes by using Mb-catalyst on preparative scale.

##### (1S,6S,7S)-7-phenyl-3-oxabicyclo[4.1.0]heptan-2-one (**2a**):

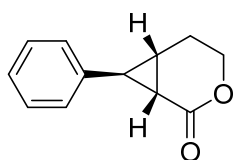

(1S,6S,7S)-7-phenyl-3-oxabicyclo[4.1.0]heptan-2-one (**2a**) was prepared according to the general **Procedure D** with *E. coli* cells expressing Mb(F43L,H64A,V68G,I107V) in 1200 mL to afford the product as a colorless oil, 85% yield (480 mg). GC-MS *m/z* (% relative intensity): 188(13.2), 144(16.8), 143(19.6), 130(12.0), 129(100), 128(37.0), 127(10.5), 115(21.3), 91(7.7), 77(8.5); <sup>1</sup>H NMR (400 MHz, CDCl<sub>3</sub>) δ 7.38 – 7.05 (m, 5H), 4.36 (dd, *J* = 12.0, 6.3 Hz, 1H), 4.27 (td, *J* = 12.5, 3.5 Hz, 1H), 2.93 (t, *J* = 4.1 Hz, 1H), 2.41 – 2.21 (m, 1H), 2.16 (m, 3H); <sup>13</sup>C NMR (101 MHz, CDCl<sub>3</sub>) δ 169.7, 138.2, 128.9, 127.2, 126.4, 64.7, 26.7, 25.1, 23.8, 20.5.

##### (1S,6S,7S)-7-(4-fluorophenyl)-3-oxabicyclo[4.1.0]heptan-2-one (**2b**):

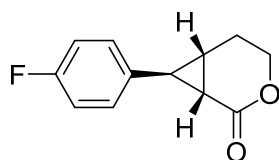

(1S,6S,7S)-7-(4-fluorophenyl)-3-oxabicyclo[4.1.0]heptan-2-one (**2b**) was prepared according to the general **Procedure D** with *E. coli* cells expressing Mb(F43L,H64A,V68G,I107V) to afford the product as a white solid, 65% yield (26.8 mg). GC-MS *m/z* (% relative intensity): 206(13.1), 162(21.4), 161(28.2), 148(12.1), 147(100), 146(36.5), 133(31.4), 127(12.9), 109(15.7); <sup>1</sup>H NMR (400 MHz, CDCl<sub>3</sub>) δ 7.15 – 6.95 (m, 4H), 4.36 (dd, *J* = 12.2, 6.2 Hz, 1H), 4.25 (td, *J* = 12.6, 3.7 Hz, 1H), 2.91 (t, *J* = 4.5 Hz, 1H), 2.38 – 2.20 (m, 1H), 2.20 – 2.06 (m, 3H); <sup>13</sup>C NMR (101 MHz,

$\text{CDCl}_3$ )  $\delta$  169.5, 133.9, 127.9, 115.8 (d,  $J = 22.3$  Hz), 64.7, 26.6, 24.4, 23.6, 20.5. F-C\* carbon is not observed;  $^{19}\text{F}$  NMR (376 MHz,  $\text{C}_6\text{D}_6$ )  $\delta$  -115.4.

**(1S,6S,7S)-7-(4-chlorophenyl)-3-oxabicyclo[4.1.0]heptan-2-one (2c):**

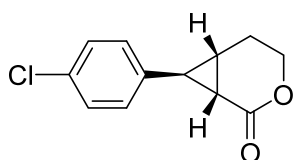

(1S,6S,7S)-7-(4-chlorophenyl)-3-oxabicyclo[4.1.0]heptan-2-one (2c)

was prepared according to the general **Procedure D** with *E. coli* cells expressing Mb(F43L,H64A,V68G,I107V) to afford the product as a white solid, 71% yield (31.6 mg). GC-MS  $m/z$  (% relative intensity):

222(13.1), 163(14.9), 144(12.4), 143(100), 142(13.9), 141(13.1), 129(19.8), 128(78.0), 127(29.9), 115(27.6), 101(6.5), 89(8.4), 75(8.2);  $^1\text{H}$  NMR (400 MHz,  $\text{CDCl}_3$ )  $\delta$  7.27 (d,  $J = 8.3$  Hz, 2H), 7.04 (d,  $J = 8.4$  Hz, 2H), 4.35 (dd,  $J = 12.2, 6.2$  Hz, 1H), 4.25 (td,  $J = 12.5, 3.5$  Hz, 1H), 2.89 (t,  $J = 4.5$  Hz, 1H), 2.37 – 2.21 (m, 1H), 2.18 – 2.08 (m, 3H);  $^{13}\text{C}$  NMR (101 MHz,  $\text{CDCl}_3$ )  $\delta$  169.3, 136.7, 132.9, 128.9, 127.7, 64.7, 26.7, 24.5, 23.8, 20.4.

**(1S,6S,7S)-7-(4-bromophenyl)-3-oxabicyclo[4.1.0]heptan-2-one (2d):**

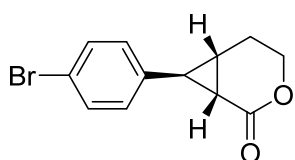

(1S,6S,7S)-7-(4-bromophenyl)-3-oxabicyclo[4.1.0]heptan-2-one (2d)

was prepared according to the general **Procedure D** with *E. coli* cells expressing Mb(F43L,H64A,V68G,I107V) to afford the product as a white solid, 42% yield (22.4 mg). GC-MS  $m/z$  (% relative intensity):

268(13.1), 266(13.2), 207(7.1), 144(10.1), 143(81.8), 142(14.9), 141(12.5), 129(20.4), 128(100), 127(16.7), 115(27.0), 102(8.5), 89(7.7), 77(6.2);  $^1\text{H}$  NMR (400 MHz,  $\text{CDCl}_3$ )  $\delta$  7.42 (d,  $J = 8.4$  Hz, 2H), 6.98 (d,  $J = 8.4$  Hz, 2H), 4.35 (dd,  $J = 12.2, 6.2$  Hz, 1H), 4.25 (td,  $J = 12.5, 3.6$  Hz, 1H), 2.88 (t,  $J = 4.5$  Hz, 1H), 2.27 (tdd,  $J = 13.8, 6.2, 3.1$  Hz, 1H), 2.18 – 2.06 (m, 3H);  $^{13}\text{C}$  NMR (101 MHz,  $\text{CDCl}_3$ )  $\delta$  167.3, 135.3, 129.9, 126.1, 118.9, 62.7, 24.7, 22.6, 21.8, 18.4.

**(1S,6S,7S)-7-(4-(trifluoromethyl)phenyl)-3-oxabicyclo[4.1.0]heptan-2-one (2e):**

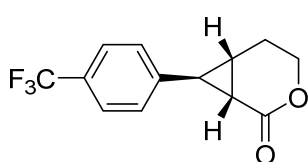

(1S,6S,7S)-7-(4-(trifluoromethyl)phenyl)-3-oxabicyclo[4.1.0]heptan-2-

one (2e) was prepared according to the general **Procedure D** with *E. coli* cells expressing Mb(F43L,H64A,V68G,I107V) to afford the product as a white solid, 40% yield (20.5 mg). GC-MS  $m/z$  (% relative

intensity): 256(4.3), 237(10.0), 212(16.3), 211(8.3), 197(61.5), 191(12.7), 183(9.8), 177(62.1), 159(9.3), 151(13.1), 144(13.0), 143(100), 142(9.8), 129(129.0), 128(66.3), 127(13.6), 115(24.7);  $^1\text{H}$  NMR (400 MHz,  $\text{CDCl}_3$ )  $\delta$  7.56 (d,  $J = 8.2$  Hz, 1H), 7.21 (d,  $J = 8.1$  Hz, 1H), 4.38 (dd,  $J = 12.2, 6.2$  Hz, 1H), 4.28 (td,  $J = 12.6, 3.5$  Hz, 1H), 2.96 (t,  $J = 4.2$  Hz, 1H), 2.35 – 2.25 (m, 1H), 2.25 – 2.11 (m, 2H);  $^{13}\text{C}$  NMR (101 MHz,  $\text{CDCl}_3$ )  $\delta$  168.9, 142.4, 126.7, 125.8 (q,  $J = 4.6$  Hz), 124.1 (q,  $J = 273.6$  Hz), 64.7, 26.9, 24.7, 24.1, 20.4.  $\text{CF}_3\text{-C}^*$  is not observed;  $^{19}\text{F}$  NMR (376 MHz,  $\text{C}_6\text{D}_6$ )  $\delta$  -63.4.

**(1S,6S,7S)-7-(p-tolyl)-3-oxabicyclo[4.1.0]heptan-2-one (2f):**

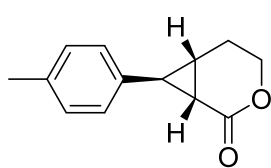

(1S,6S,7S)-7-(p-tolyl)-3-oxabicyclo[4.1.0]heptan-2-one (**2f**) was prepared according to the general **Procedure D** with *E. coli* cells expressing Mb(F43L,H64A,V68G,I107V) to afford the product as a white solid, 25% yield (10.1 mg). GC-MS  $m/z$  (% relative intensity): 202(30.5), 158(8.0), 157(15.5), 144(12.8), 143(100), 142(16.4), 141(12.0), 129(26.7), 128(57.4), 127(12.8), 115(25.4), 91(10.4), 77(13.0);  $^1\text{H}$  NMR (400 MHz,  $\text{CDCl}_3$ )  $\delta$  7.11 (d,  $J = 7.6$  Hz, 2H), 7.00 (d,  $J = 7.8$  Hz, 2H), 4.34 (dd,  $J = 12.5, 6.0$  Hz, 1H), 4.26 (td,  $J = 12.5, 3.3$  Hz, 1H), 2.90 (t,  $J = 4.6$  Hz, 1H), 2.32 (s, 3H), 2.28 – 2.20 (m, 1H), 2.16 – 2.08 (m, 3H);  $^{13}\text{C}$  NMR (101 MHz,  $\text{CDCl}_3$ )  $\delta$  166.0, 134.7, 131.7, 129.5, 126.3, 64.7, 26.6, 24.9, 23.7, 22.7, 20.6.

**(1S,6S,7S)-7-(m-tolyl)-3-oxabicyclo[4.1.0]heptan-2-one (2g):**

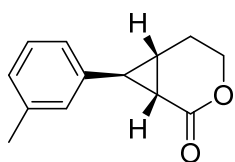

(1S,6S,7S)-7-(m-tolyl)-3-oxabicyclo[4.1.0]heptan-2-one (**2g**) was prepared according to the general **Procedure D** with *E. coli* cells expressing Mb(F43L,H64A,V68G,I107V) to afford the product as a white solid, 77% yield (31.1 mg). GC-MS  $m/z$  (% relative intensity): 202(28.1), 158(7.4), 157(13.0), 144(12.8), 143(100), 142(15.2), 141(11.6), 129(27.1), 128(59.9), 127(13.2), 115(25.2), 91(10.0), 77(13.1);  $^1\text{H}$  NMR (400 MHz,  $\text{CDCl}_3$ )  $\delta$  7.19 (t,  $J = 7.6$  Hz, 1H), 7.05 (d,  $J = 7.6$  Hz, 1H), 6.93 (s, 1H), 6.90 (d,  $J = 7.8$  Hz, 1H), 4.35 (dd,  $J = 12.1, 6.3$  Hz, 1H), 4.26 (td,  $J = 12.5, 3.5$  Hz, 1H), 2.89 (t,  $J = 4.4$  Hz, 1H), 2.33 (s, 3H), 2.31 – 2.21 (m, 1H), 2.19 – 2.09 (m, 3H);  $^{13}\text{C}$  NMR (101 MHz,  $\text{CDCl}_3$ )  $\delta$  167.8, 136.6, 136.1, 126.8, 125.9, 125.2, 121.4, 62.7, 24.6, 23.1, 21.7, 19.5, 18.5.

**(1S,6S,7S)-7-(o-tolyl)-3-oxabicyclo[4.1.0]heptan-2-one (2h):**

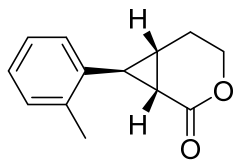

(1S,6S,7S)-7-(o-tolyl)-3-oxabicyclo[4.1.0]heptan-2-one (**2h**) was prepared according to the general **Procedure D** with *E. coli* cells expressing Mb(F43L,H64A,V68G,I107V) to afford the product as a green solid, 82% yield (33.2 mg). GC-MS m/z (% relative intensity): 202(47.4), 158(6.3), 157(27.0), 144(12.8), 143(100), 142(17.0), 141(14.0), 130(11.4), 129(51.2), 128(80.2), 127(18.6), 116(12.8), 115(38.5), 91(14.5), 77(17.6); <sup>1</sup>H NMR (400 MHz, CDCl<sub>3</sub>) δ 7.21 – 7.12 (m, 3H), 7.07 (d, *J* = 6.6 Hz, 1H), 4.38 (dd, *J* = 12.1, 6.1 Hz, 1H), 4.27 (td, *J* = 12.6, 3.7 Hz, 1H), 2.93 (t, *J* = 4.7 Hz, 1H), 2.40 (s, 3H), 2.38 – 2.26 (m, 1H), 2.22 – 2.05 (m, 3H); <sup>13</sup>C NMR (101 MHz, CDCl<sub>3</sub>) δ 170.3, 138.1, 136.1, 130.3, 127.5, 126.5, 126.3, 64.9, 24.8, 23.6, 22.1, 20.7, 19.8.

**(1S,6S,7S)-7-(2-methoxyphenyl)-3-oxabicyclo[4.1.0]heptan-2-one (2i):**

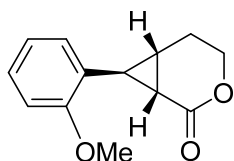

(1S,6S,7S)-7-(2-methoxyphenyl)-3-oxabicyclo[4.1.0]heptan-2-one (**2i**) was prepared according to the general **Procedure D** with *E. coli* cells expressing Mb(F43L,H64A,V68G,I107V) to afford the product as a white liquid, 84% yield (36.7 mg). GC-MS m/z (% relative intensity): 218(89.8), 187(17.3), 174(19.2), 173(74.4), 159(100), 158(24.3), 145(24.7), 144(64.9), 143(51.8), 141(27.5), 132(16.3), 131(56.9), 129(27.5), 128(44.3), 127(23.0), 116(21.3), 115(64.2), 91(63.9), 89(16.9), 77(32.6), 65(15.5), 51(16.1); <sup>1</sup>H NMR (400 MHz, CDCl<sub>3</sub>) δ 7.22 (ddd, *J* = 9.0, 6.6, 2.6 Hz, 1H), 6.94 – 6.83 (m, 3H), 4.36 – 4.29 (m, 2H), 3.85 (s, 3H), 3.21 (t, *J* = 4.7 Hz, 1H), 2.31 – 2.20 (m, 1H), 2.17 – 2.08 (m, 3H); <sup>13</sup>C NMR (101 MHz, CDCl<sub>3</sub>) δ 158.1, 128.2, 126.8, 126.5, 125.9, 120.7, 110.5, 64.8, 55.6, 25.5, 22.7, 20.7, 19.7.

**(1S,6R)-7,7-dimethyl-3-oxabicyclo[4.1.0]heptan-2-one (2j):**

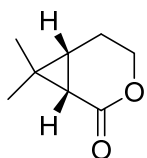

(1S,6R)-7,7-dimethyl-3-oxabicyclo[4.1.0]heptan-2-one (**2j**) was prepared according to the general **Procedure D** with *E. coli* cells expressing Mb(F43L,H64A,V68G,I107V) in 200 mL with 1 mM of **1j** to afford the product as a white solid, 32% yield (9.0 mg). GC-MS m/z (% relative intensity): 140(3.5), 125(8.5), 97(7.2), 96(28.9), 95(23.8), 82(16.8), 81(100), 79(22.7), 67(35.2), 57(20.3), 56(21.3), 55(15.6); <sup>1</sup>H NMR (400 MHz, CDCl<sub>3</sub>) δ 4.33 – 4.08 (m, 2H), 2.35 (t, *J* = 7.4 Hz, 1H), 1.89 – 1.72 (m, 1H), 1.59 –

1.44 (m, 2H), 1.20 (s, 3H), 1.13 (s, 3H);  $^{13}\text{C}$  NMR (101 MHz,  $\text{CDCl}_3$ )  $\delta$  167.5, 69.5, 27.6, 25.0, 23.9, 22.8, 19.3, 16.5.

**2-((1S,2S,3S)-2-(hydroxymethyl)-3-phenylcyclopropyl)ethan-1-ol (4):**

2-((1S,2S,3S)-2-(hydroxymethyl)-3-phenylcyclopropyl)ethan-1-ol (**4**) was prepared according to

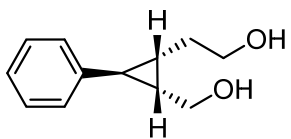

a reported procedure.<sup>3</sup> (1S,6S,7S)-7-phenyl-3-oxabicyclo[4.1.0]heptan-2-one (**2a**) (40 mg, 0.21 mmol, 1 equiv) in dry THF was added dropwise to a suspension of  $\text{LiAlH}_4$  (1 equiv) in dry THF at 0 °C. The resulting

mixture was stirred for 2 h at room temperature and then quenched with aqueous diethyl ether and stirred for 1 h at room temperature. After filtration through a pad of Celite, the filtrate was dried over  $\text{MgSO}_4$  and concentrated to give a residue, which was further purified by silica-gel chromatography using 80% EtOAc/hexanes as eluent to afford the product as a white solid, 36 mg, 89% yield. GC-MS  $m/z$  (% relative intensity): 192(0.6), 162(11.8), 161(50.8), 143(35.2), 129(54.2), 128(58.4), 117(100), 115(61.6), 91(75.4);  $^1\text{H}$  NMR (500 MHz,  $\text{CDCl}_3$ )  $\delta$  7.25 (d,  $J$  = 6.3 Hz, 2H), 7.19 – 7.09 (m, 1H), 7.04 (d,  $J$  = 6.5 Hz, 1H), 4.16 – 4.00 (m, 1H), 3.88 (s, 1H), 3.80 – 3.60 (m, 1H), 3.42 (t,  $J$  = 10.5 Hz, 1H), 2.09 (d,  $J$  = 13.6 Hz, 1H), 1.69 (d,  $J$  = 3.8 Hz, 1H), 1.65 – 1.53 (m, 1H), 1.47 (d,  $J$  = 3.6 Hz, 1H), 1.21 (s, 1H);  $^{13}\text{C}$  NMR (126 MHz,  $\text{CDCl}_3$ )  $\delta$  143.1, 129.1, 126.4, 126.3, 63.7, 61.9, 30.9, 30.5, 26.7, 26.5.

**(1S,2S,3S)-2-(2-hydroxyethyl)-3-phenylcyclopropane-1-carboxylic acid (5):**

(1S,2S,3S)-2-(2-hydroxyethyl)-3-phenylcyclopropane-1-carboxylic acid (**5**) was prepared

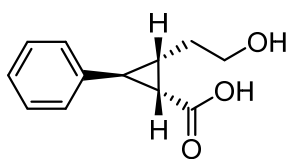

according to a modified version of a reported procedure.<sup>3</sup> To a solution of  $\text{LiOH}$  (5 equiv) in water:THF (1:5) at RT was slowly added the (1S,6S,7S)-7-phenyl-3-oxabicyclo[4.1.0]heptan-2-one (**2a**) (40 mg, 0.21 mmol, 1 equiv). The mixture was refluxed for 10 h. Solvent was removed

under reduced pressure. The residue was dissolved in water and acidified with 2M  $\text{HCl}$  to pH 1 followed by extraction with DCM. The crude product was purified by column chromatography on silica gel with Ethyl acetate to afford the product as a white solid, 41 mg, 94% yield.  $^1\text{H}$  NMR

(500 MHz, MeOD)  $\delta$  7.23 (d,  $J = 7.6$  Hz, 2H), 7.14 (t,  $J = 7.3$  Hz, 1H), 7.10 (d,  $J = 7.4$  Hz, 2H), 3.62 (t,  $J = 6.5$  Hz, 2H), 2.43 – 2.35 (m, 1H), 2.06 – 1.93 (m, 2H), 1.92 – 1.83 (m, 1H), 1.81 – 1.70 (m, 1H);  $^{13}\text{C}$  NMR (126 MHz, MeOD)  $\delta$  174.7, 141.1, 128.8, 126.7, 126.6, 61.8, 31.8, 30.5, 28.5, 28.3.

## X-ray crystallographic analyses

X-ray crystal diffraction data were collected using a XtaLab Synergy-S Dualflex diffractometer equipped with a HyPix-6000HE HPC area detector for data collection at 100.00(10) K. A preliminary set of cell constants and an orientation matrix were calculated from reflections harvested from a sampling of reciprocal space (*CrysAlisPro*, version 171.40.71a; Rigaku Corporation: Oxford, UK, 2020.). The full data collection was carried out using a PhotonJet (Cu) X-ray Source with frame times of 0.07 and 0.26 seconds and a detector distance of 31.2 mm. Series of frames were collected in  $0.50^\circ$  steps in  $\omega$  at different  $2\theta$ ,  $\kappa$ , and  $\phi$  settings. The intensity data were scaled and corrected for absorption, and final cell constants were calculated from the xyz centroids of strong reflections from the actual data collections after integration. Space groups were determined based on systematic absences and intensity statistics.

Structures were solved using SHELXT(Sheldrick, G. M. *SHELXT*, version 2018/2; *Acta Crystallogr.* 2015, A71, 3-8.) and refined using SHELXL (against  $F^2$ ) (Sheldrick, G. M. *SHELXL*, version 2018/3; *Acta Crystallogr.* 2015, C71, 3-8.). All non-hydrogen atoms were refined with anisotropic displacement parameters. All hydrogen atoms were placed in ideal positions and refined as riding atoms with relative isotropic displacement parameters. See **Figure S3-S4** and **Table S8-S9** for additional crystal data and structure refinement information for **2e** and **2i**.



**Table S8.** Crystal data and structure refinement for (1*S*,6*S*,7*S*)-7-(4-(trifluoromethyl)phenyl)-3-oxabicyclo[4.1.0]heptan-2-one (**2e**). Cambridge Crystallographic Data Centre (CCDC) entry: 1998584.

|                                                     |                                                               |                     |
|-----------------------------------------------------|---------------------------------------------------------------|---------------------|
| Identification code                                 | <b>2e</b>                                                     |                     |
| Empirical formula                                   | C <sub>13</sub> H <sub>11</sub> F <sub>3</sub> O <sub>2</sub> |                     |
| Formula weight                                      | 256.22                                                        |                     |
| Temperature                                         | 100.00(10) K                                                  |                     |
| Wavelength                                          | 1.54184 Å                                                     |                     |
| Crystal system                                      | orthorhombic                                                  |                     |
| Space group                                         | <i>P</i> 2 <sub>1</sub> 2 <sub>1</sub> 2 <sub>1</sub>         |                     |
| Unit cell dimensions                                | <i>a</i> = 5.19720(10) Å                                      | $\alpha = 90^\circ$ |
|                                                     | <i>b</i> = 10.3107(2) Å                                       | $\beta = 90^\circ$  |
|                                                     | <i>c</i> = 21.0437(4) Å                                       | $\gamma = 90^\circ$ |
| Volume                                              | 1127.66(4) Å <sup>3</sup>                                     |                     |
| <i>Z</i>                                            | 4                                                             |                     |
| Density (calculated)                                | 1.509 Mg/m <sup>3</sup>                                       |                     |
| Absorption coefficient                              | 1.163 mm <sup>-1</sup>                                        |                     |
| <i>F</i> (000)                                      | 528                                                           |                     |
| Crystal color, morphology                           | colourless, plate                                             |                     |
| Crystal size                                        | 0.202 x 0.154 x 0.038 mm <sup>3</sup>                         |                     |
| Theta range for data collection                     | 4.202 to 77.587°                                              |                     |
| Index ranges                                        | -5 ≤ <i>h</i> ≤ 6, -12 ≤ <i>k</i> ≤ 13, -26 ≤ <i>l</i> ≤ 25   |                     |
| Reflections collected                               | 11981                                                         |                     |
| Independent reflections                             | 2383 [ <i>R</i> (int) = 0.0502]                               |                     |
| Observed reflections                                | 2258                                                          |                     |
| Completeness to theta = 74.504°                     | 100.0%                                                        |                     |
| Absorption correction                               | Multi-scan                                                    |                     |
| Max. and min. transmission                          | 1.00000 and 0.84871                                           |                     |
| Refinement method                                   | Full-matrix least-squares on <i>F</i> <sup>2</sup>            |                     |
| Data / restraints / parameters                      | 2383 / 0 / 163                                                |                     |
| Goodness-of-fit on <i>F</i> <sup>2</sup>            | 1.068                                                         |                     |
| Final <i>R</i> indices [ <i>I</i> > 2σ( <i>I</i> )] | <i>R</i> 1 = 0.0416, <i>wR</i> 2 = 0.1114                     |                     |
| <i>R</i> indices (all data)                         | <i>R</i> 1 = 0.0437, <i>wR</i> 2 = 0.1135                     |                     |
| Absolute structure parameter                        | 0.08(7)                                                       |                     |
| Largest diff. peak and hole                         | 0.326 and -0.438 e.Å <sup>-3</sup>                            |                     |

**Table S9.** Crystal data and structure refinement for (1*S*,6*S*,7*S*)-7-(2-methoxyphenyl)-3-oxabicyclo[4.1.0]heptan-2-one (**2i**). Cambridge Crystallographic Data Centre (CCDC) entry: 1998585.

|                                                     |                                                             |                     |
|-----------------------------------------------------|-------------------------------------------------------------|---------------------|
| Identification code                                 | <b>2i</b>                                                   |                     |
| Empirical formula                                   | C <sub>13</sub> H <sub>14</sub> O <sub>3</sub>              |                     |
| Formula weight                                      | 218.24                                                      |                     |
| Temperature                                         | 100.00(10) K                                                |                     |
| Wavelength                                          | 1.54184 Å                                                   |                     |
| Crystal system                                      | orthorhombic                                                |                     |
| Space group                                         | <i>P</i> 2 <sub>1</sub> 2 <sub>1</sub> 2 <sub>1</sub>       |                     |
| Unit cell dimensions                                | <i>a</i> = 6.97510(10) Å                                    | $\alpha = 90^\circ$ |
|                                                     | <i>b</i> = 9.07040(10) Å                                    | $\beta = 90^\circ$  |
|                                                     | <i>c</i> = 17.0695(2) Å                                     | $\gamma = 90^\circ$ |
| Volume                                              | 1079.94(2) Å <sup>3</sup>                                   |                     |
| <i>Z</i>                                            | 4                                                           |                     |
| Density (calculated)                                | 1.342 Mg/m <sup>3</sup>                                     |                     |
| Absorption coefficient                              | 0.774 mm <sup>-1</sup>                                      |                     |
| <i>F</i> (000)                                      | 464                                                         |                     |
| Crystal color, morphology                           | colourless, plate                                           |                     |
| Crystal size                                        | 0.458 x 0.238 x 0.036 mm <sup>3</sup>                       |                     |
| Theta range for data collection                     | 5.182 to 77.833°                                            |                     |
| Index ranges                                        | -7 ≤ <i>h</i> ≤ 8, -11 ≤ <i>k</i> ≤ 11, -21 ≤ <i>l</i> ≤ 21 |                     |
| Reflections collected                               | 35394                                                       |                     |
| Independent reflections                             | 2297 [ <i>R</i> (int) = 0.0730]                             |                     |
| Observed reflections                                | 2219                                                        |                     |
| Completeness to theta = 74.504°                     | 100.0%                                                      |                     |
| Absorption correction                               | Multi-scan                                                  |                     |
| Max. and min. transmission                          | 1.00000 and 0.45048                                         |                     |
| Refinement method                                   | Full-matrix least-squares on <i>F</i> <sup>2</sup>          |                     |
| Data / restraints / parameters                      | 2297 / 0 / 147                                              |                     |
| Goodness-of-fit on <i>F</i> <sup>2</sup>            | 1.054                                                       |                     |
| Final <i>R</i> indices [ <i>I</i> > 2σ( <i>I</i> )] | <i>R</i> 1 = 0.0315, <i>wR</i> 2 = 0.0827                   |                     |
| <i>R</i> indices (all data)                         | <i>R</i> 1 = 0.0325, <i>wR</i> 2 = 0.0837                   |                     |
| Absolute structure parameter                        | -0.12(9)                                                    |                     |
| Extinction coefficient                              | 0.0077(11)                                                  |                     |
| Largest diff. peak and hole                         | 0.194 and -0.166 e.Å <sup>-3</sup>                          |                     |

## References:

- (1) Bordeaux, M., Tyagi, V., and Fasan, R. Highly Diastereoselective and Enantioselective Olefin Cyclopropanation Using Engineered Myoglobin-Based Catalysts, *Angew. Chem. Int. Ed.* **2015**, *54*, 1744–1748.
- (2) Bajaj, P., Sreenilayam, G., Tyagi, V., and Fasan, R. Gram-Scale Synthesis of Chiral Cyclopropane Containing Drugs and Drug Precursors with Engineered Myoglobin Catalysts Featuring Complementary Stereoselectivity, *Angew. Chem. Int. Ed.* **2016**, *55*, 16110–16114.
- (3) Chandgude, A., Ren, X., and Fasan, R. Stereodivergent Intramolecular Cyclopropanation Enabled by Engineered Carbene Transferases *J. Am. Chem. Soc.* **2019**, *141*, 9145-9150.
- (4) Mandour, H. S. A., Chanthamath, S., Shibatomi, K., Iwasa, S., Inter- and Intramolecular Cyclopropanations of Diazo Weinreb Amides Catalyzed by Ruthenium(II)-Amm-Pheox, *Adv. Synth. Catal.* **2017**, *359*, 1742–1746.

# NMR Spectra

(E)-4-phenylbut-3-en-1-yl 2-diazoacetate (1a): 500 MHz  $^1\text{H}$  spectrum and 126 MHz  $^{13}\text{C}$  spectrum in  $\text{CDCl}_3$  solvent

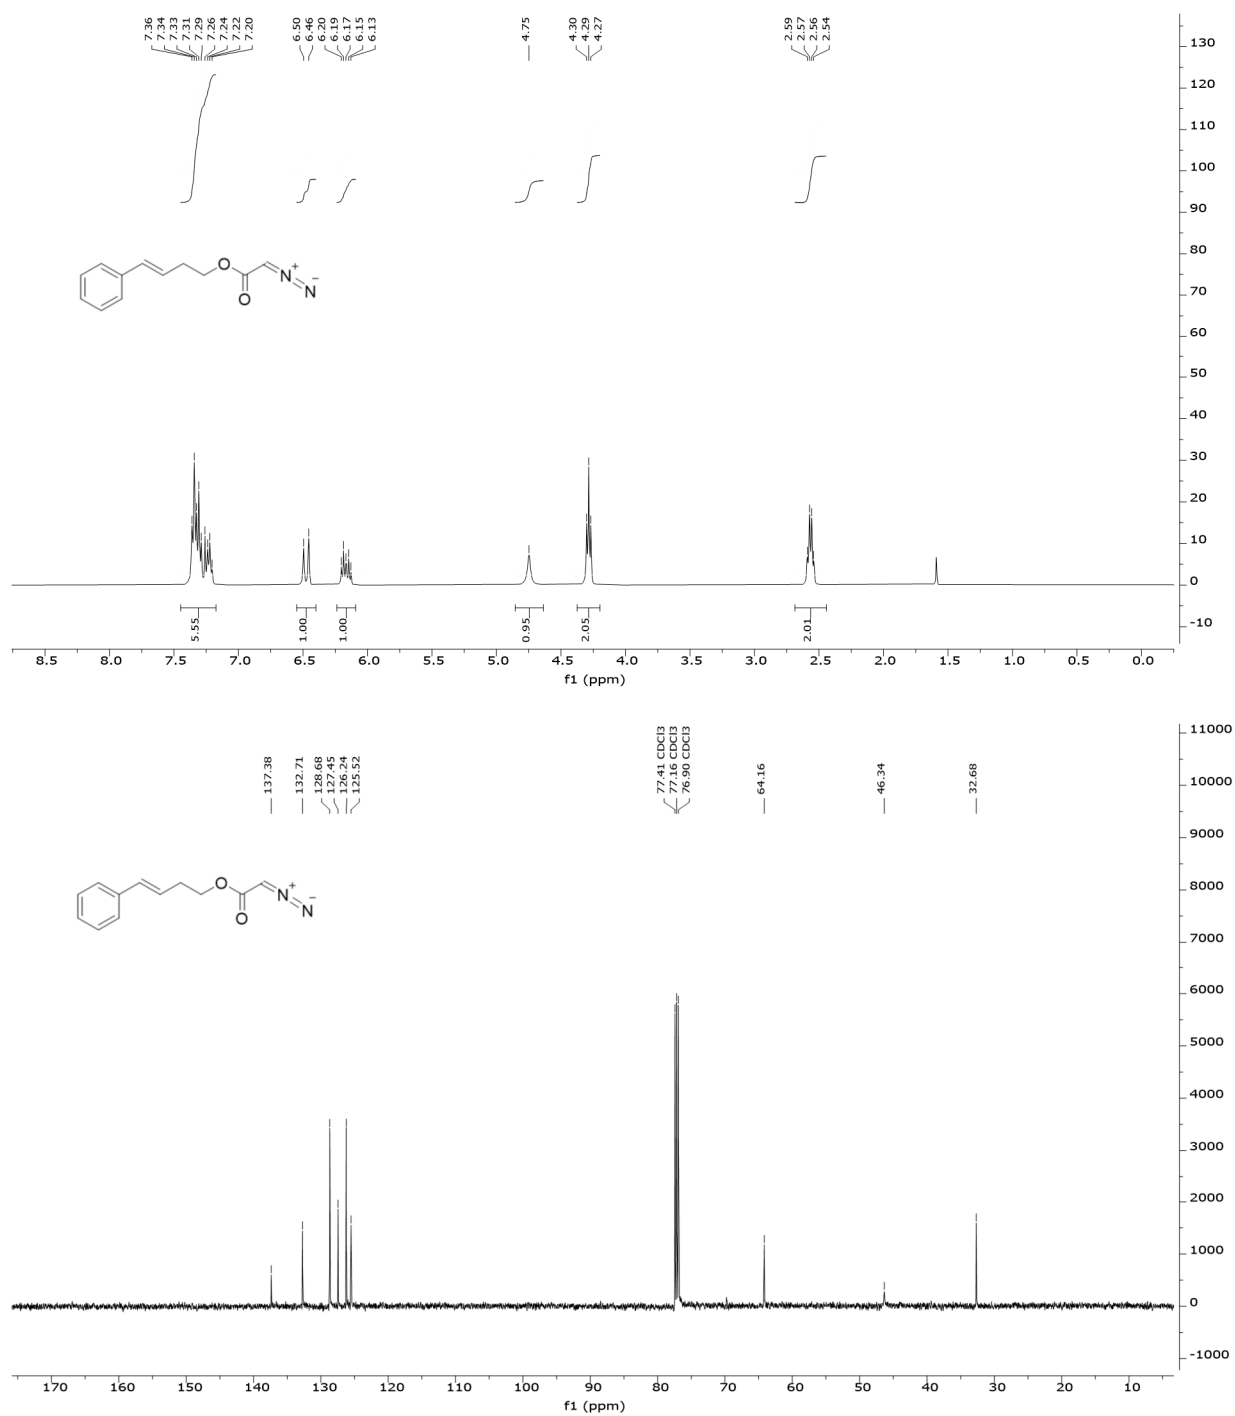

**(E)-4-(4-fluorophenyl)but-3-en-1-yl 2-diazoacetate (1b):** 500 MHz  $^1\text{H}$  spectrum, 126 MHz  $^{13}\text{C}$  spectrum and 376 MHz  $^{19}\text{F}$  spectrum in  $\text{CDCl}_3$  solvent

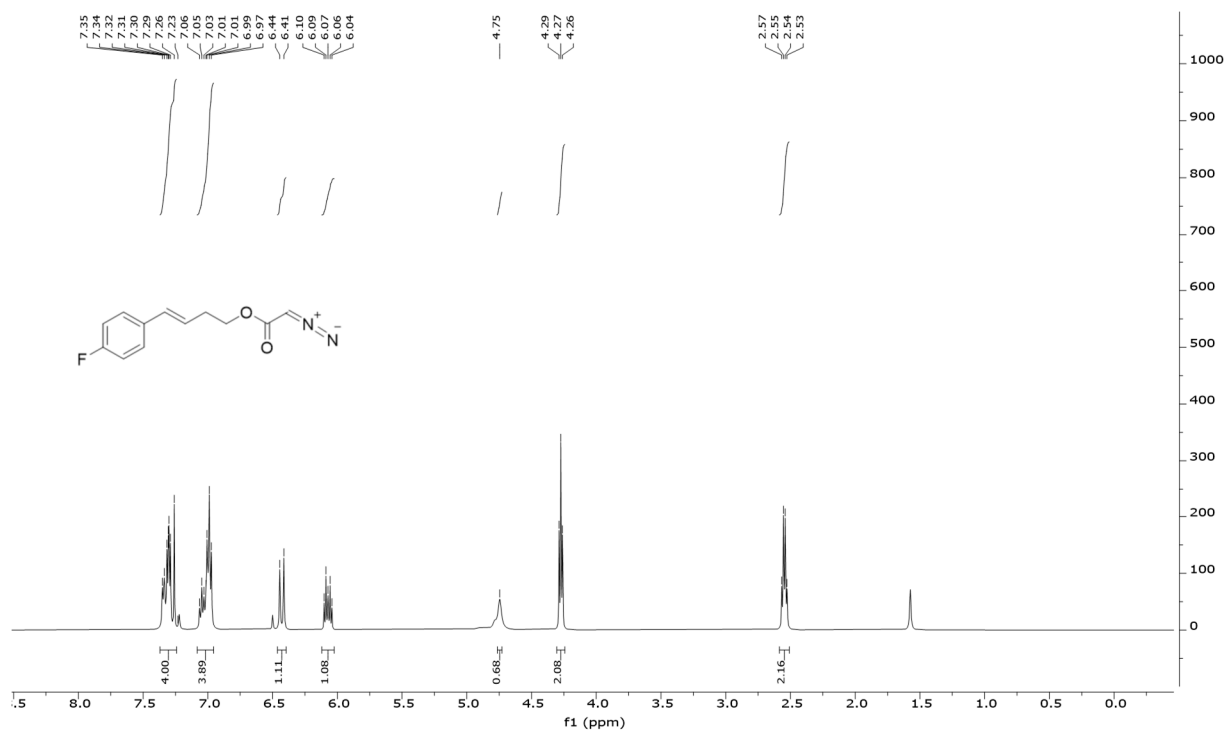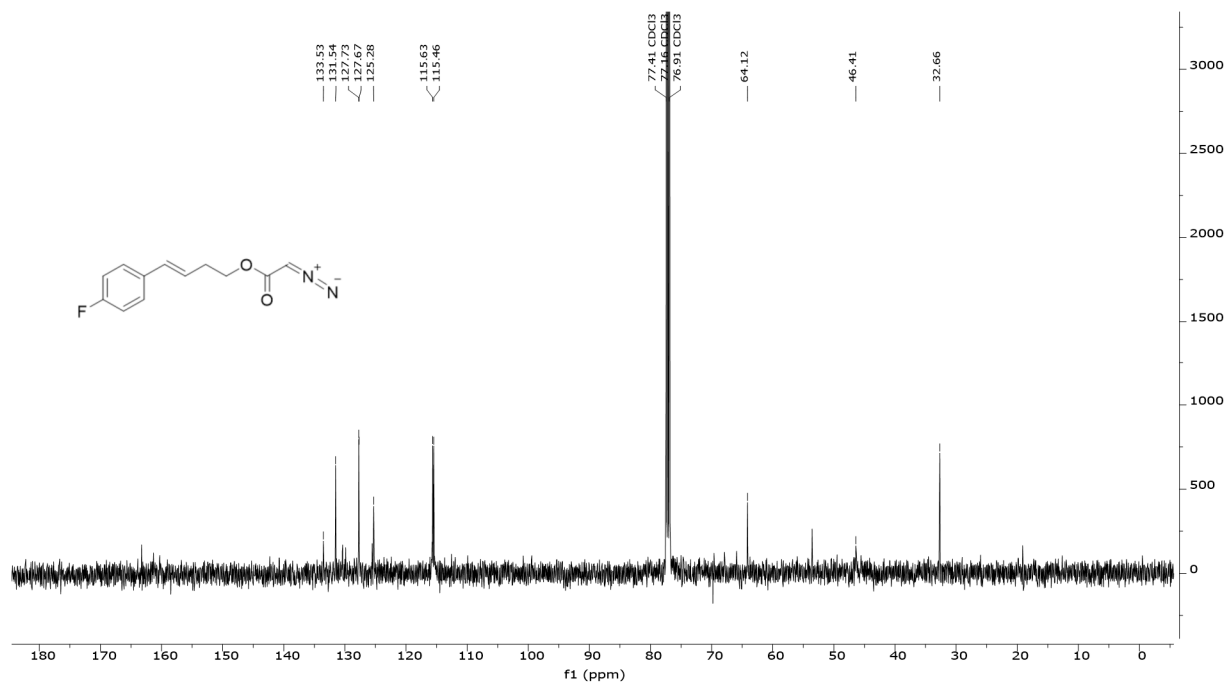

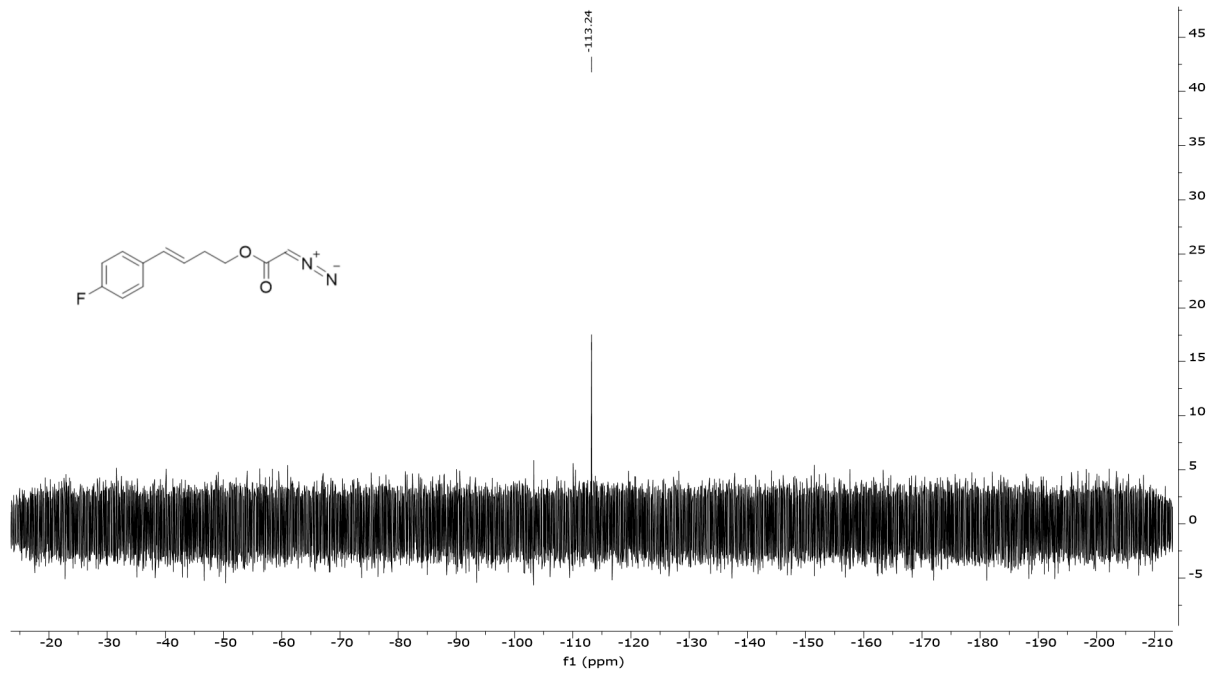

**(E)-4-(4-chlorophenyl)but-3-en-1-yl 2-diazoacetate (1c):** 500 MHz  $^1\text{H}$  spectrum and 126 MHz  $^{13}\text{C}$  spectrum in  $\text{CDCl}_3$  solvent

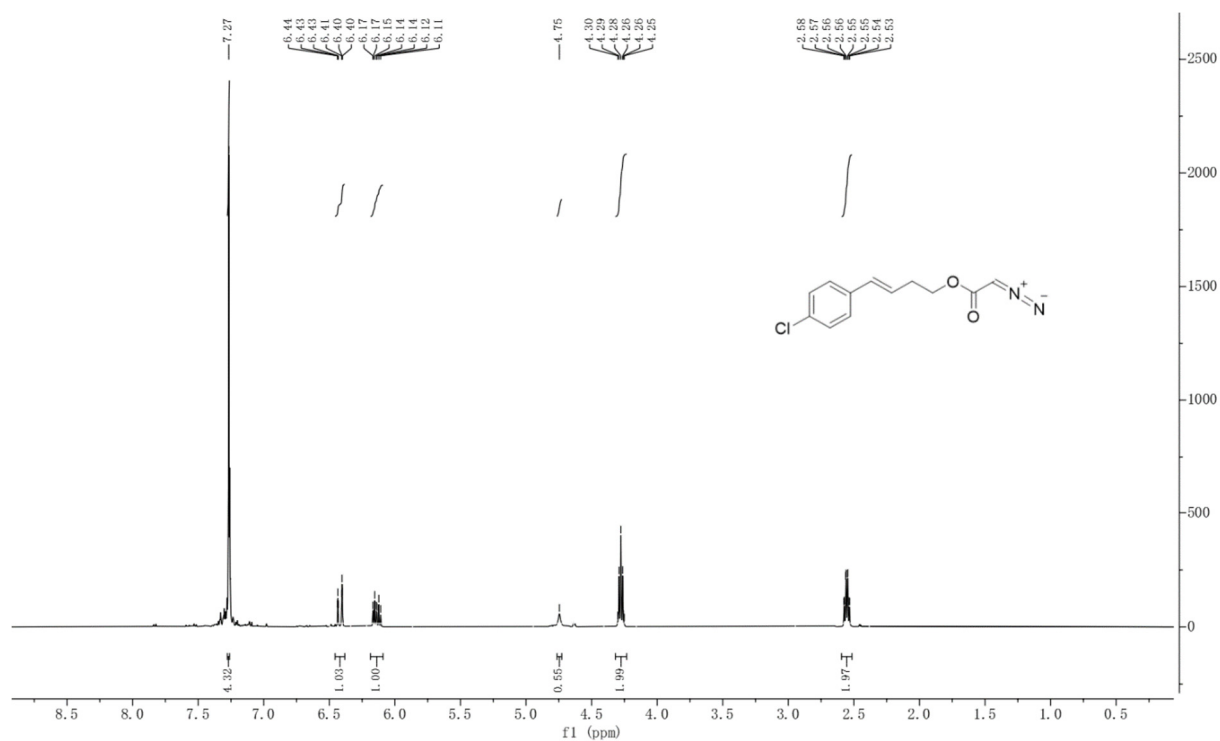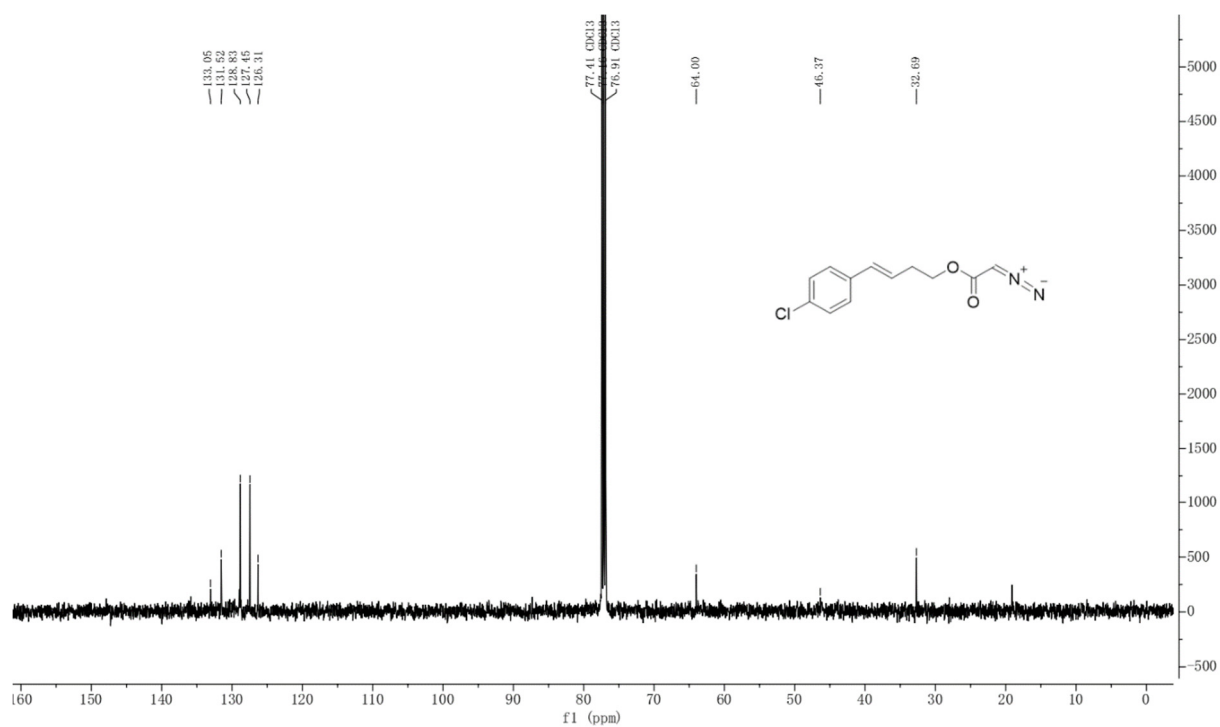

**(E)-4-(4-bromophenyl)but-3-en-1-yl 2-diazoacetate (1d):** 400 MHz  $^1\text{H}$  spectrum and 101 MHz  $^{13}\text{C}$  spectrum in  $\text{CDCl}_3$  solvent

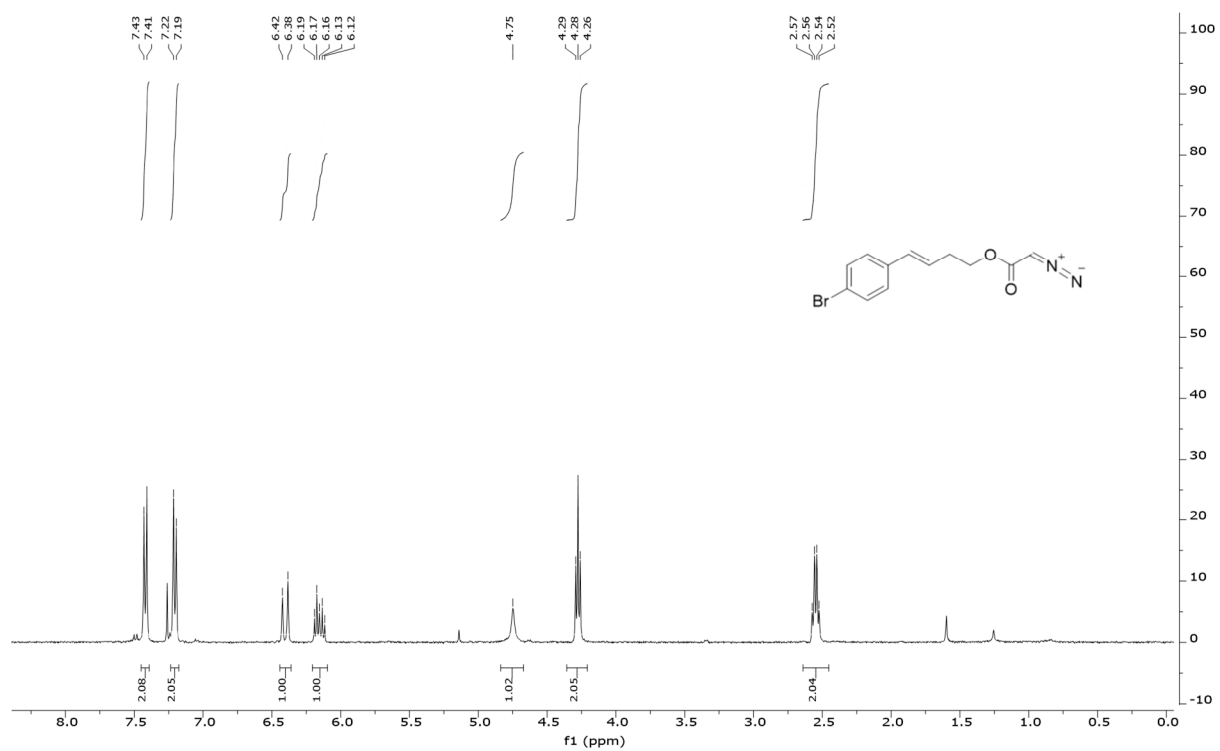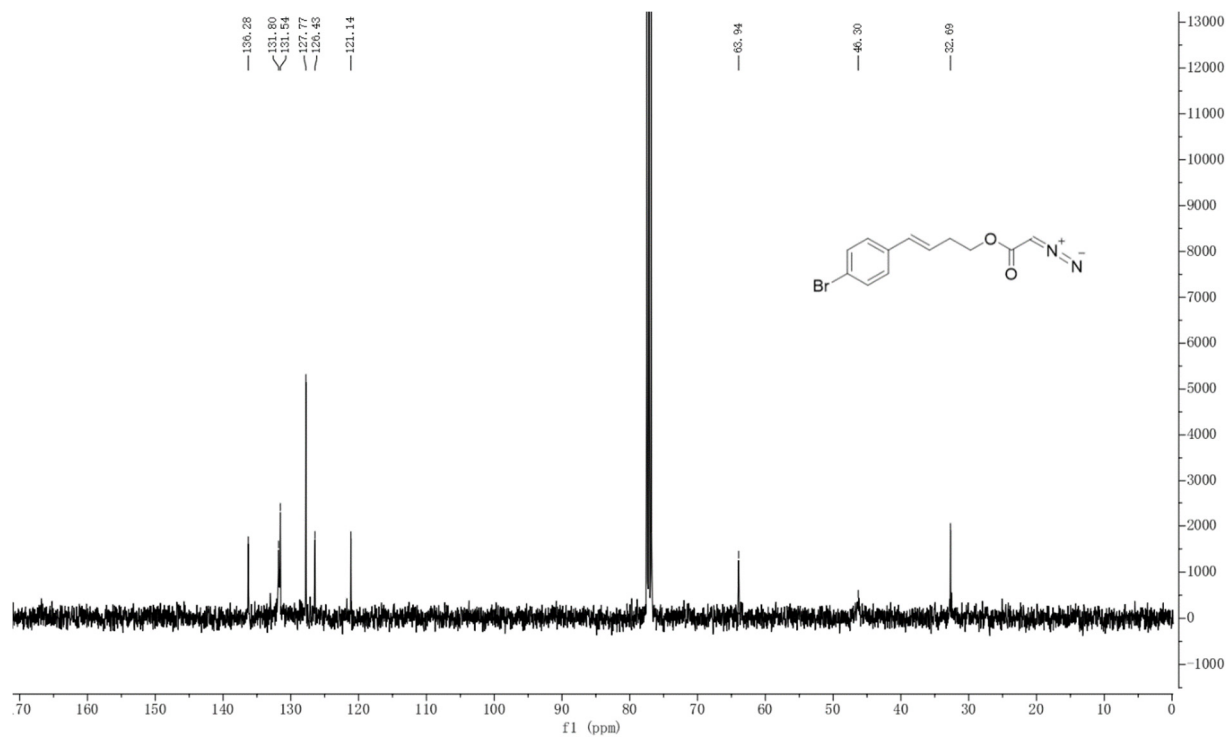



**(E)-4-(4-(trifluoromethyl)phenyl)but-3-en-1-yl 2-diazoacetate (1e):** 400 MHz  $^1\text{H}$  spectrum, 101 MHz  $^{13}\text{C}$  spectrum and 376 MHz  $^{19}\text{F}$  spectrum in  $\text{CDCl}_3$  solvent

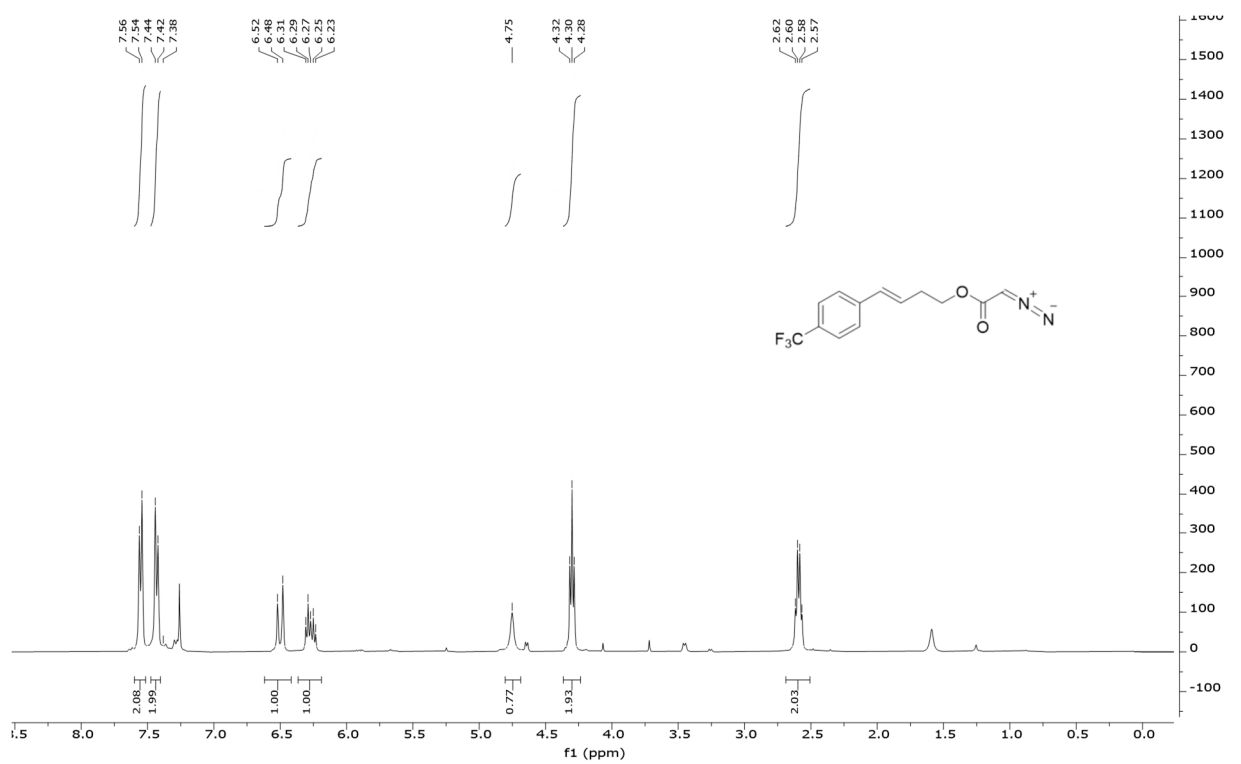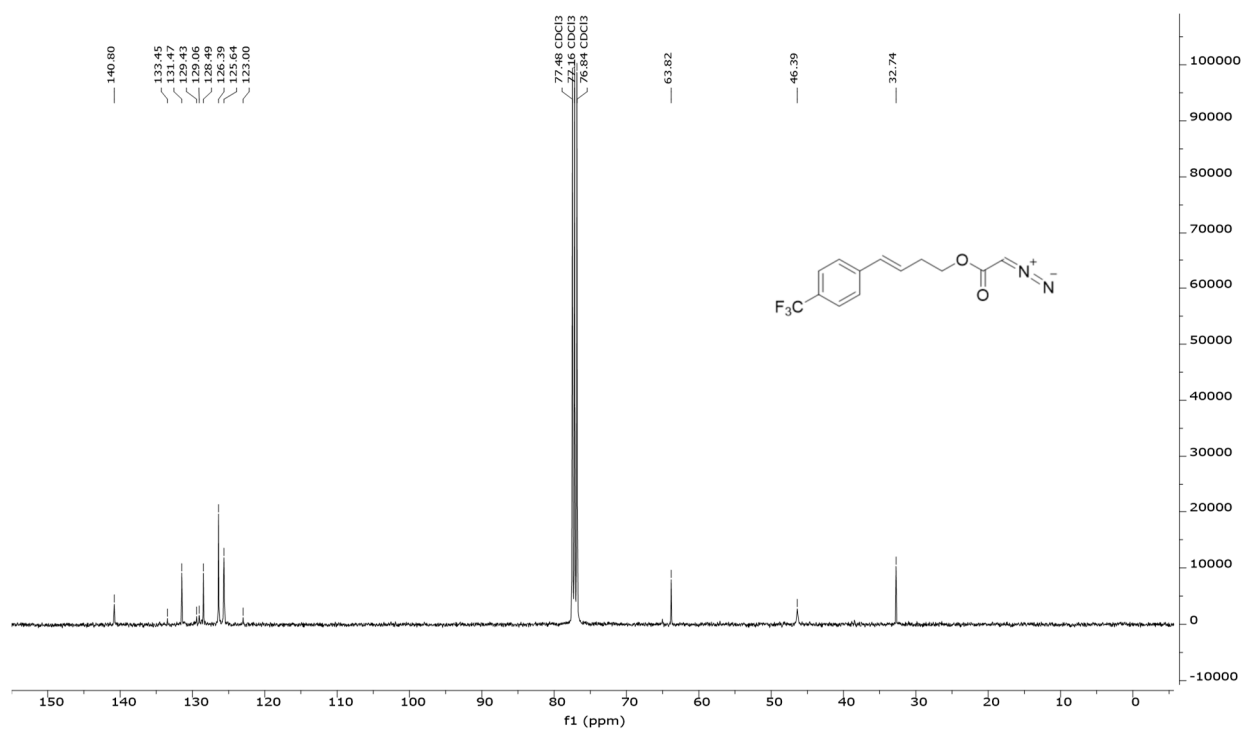

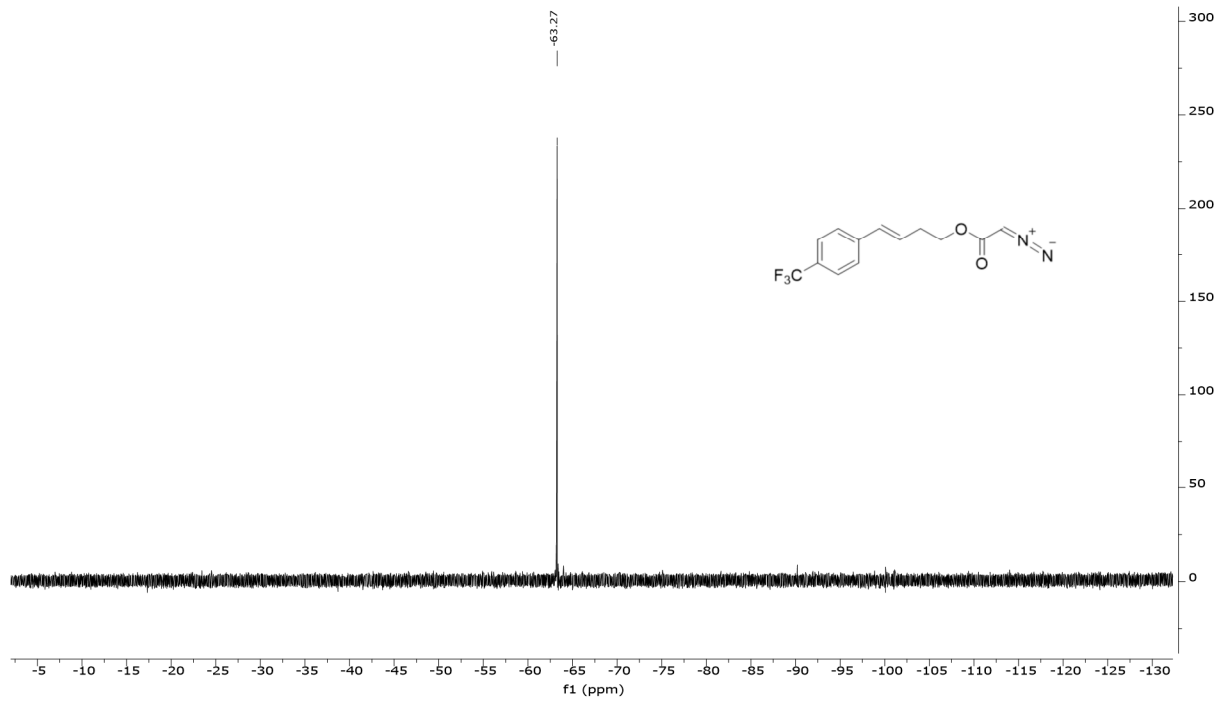

**(E)-4-(p-tolyl)but-3-en-1-yl 2-diazoacetate (1f):** 400 MHz  $^1\text{H}$  spectrum and 101 MHz  $^{13}\text{C}$  spectrum in  $\text{CDCl}_3$  solvent

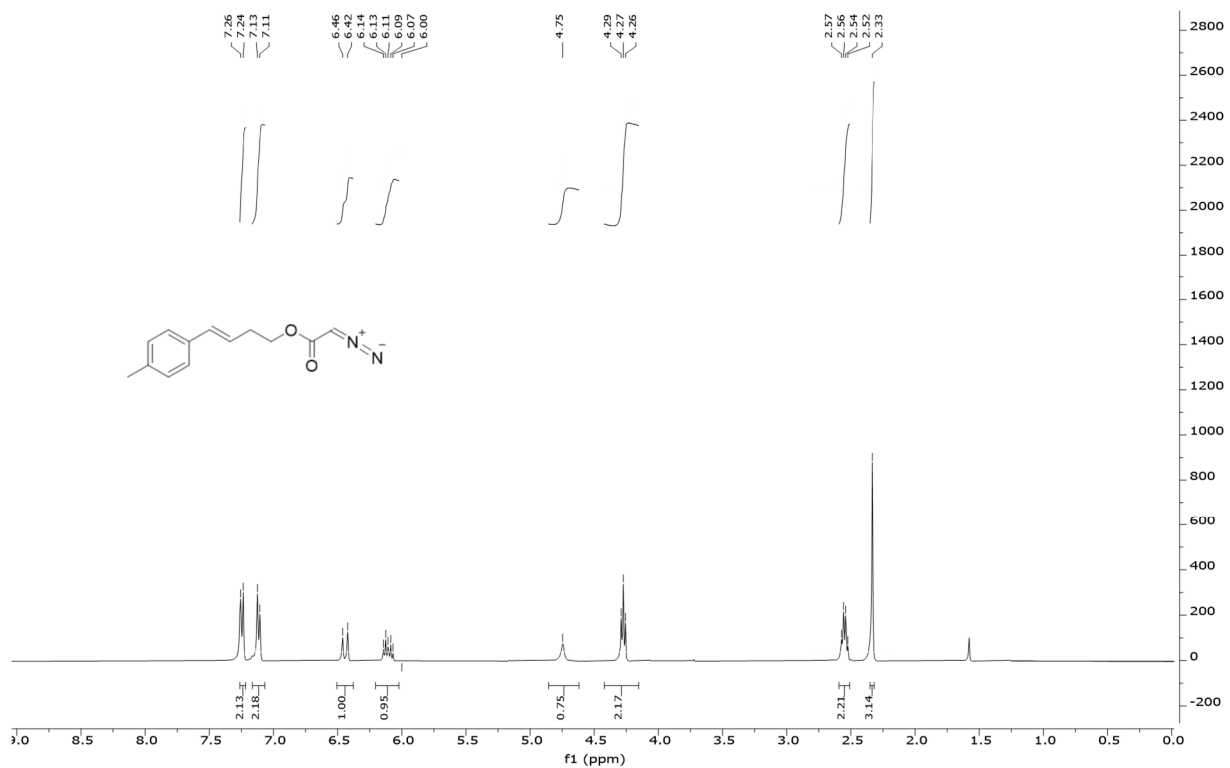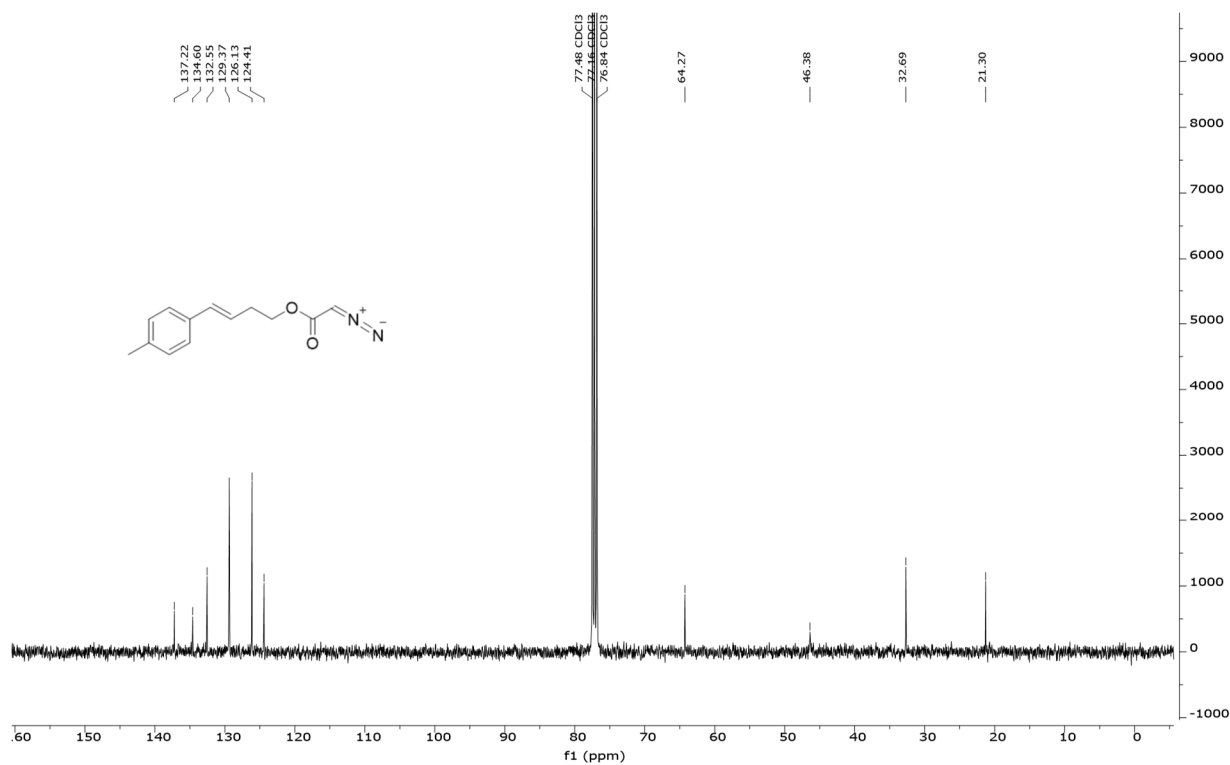

**(E)-4-(m-tolyl)but-3-en-1-yl 2-diazoacetate (1g):** 400 MHz  $^1\text{H}$  spectrum and 101 MHz  $^{13}\text{C}$  spectrum in  $\text{CDCl}_3$  solvent

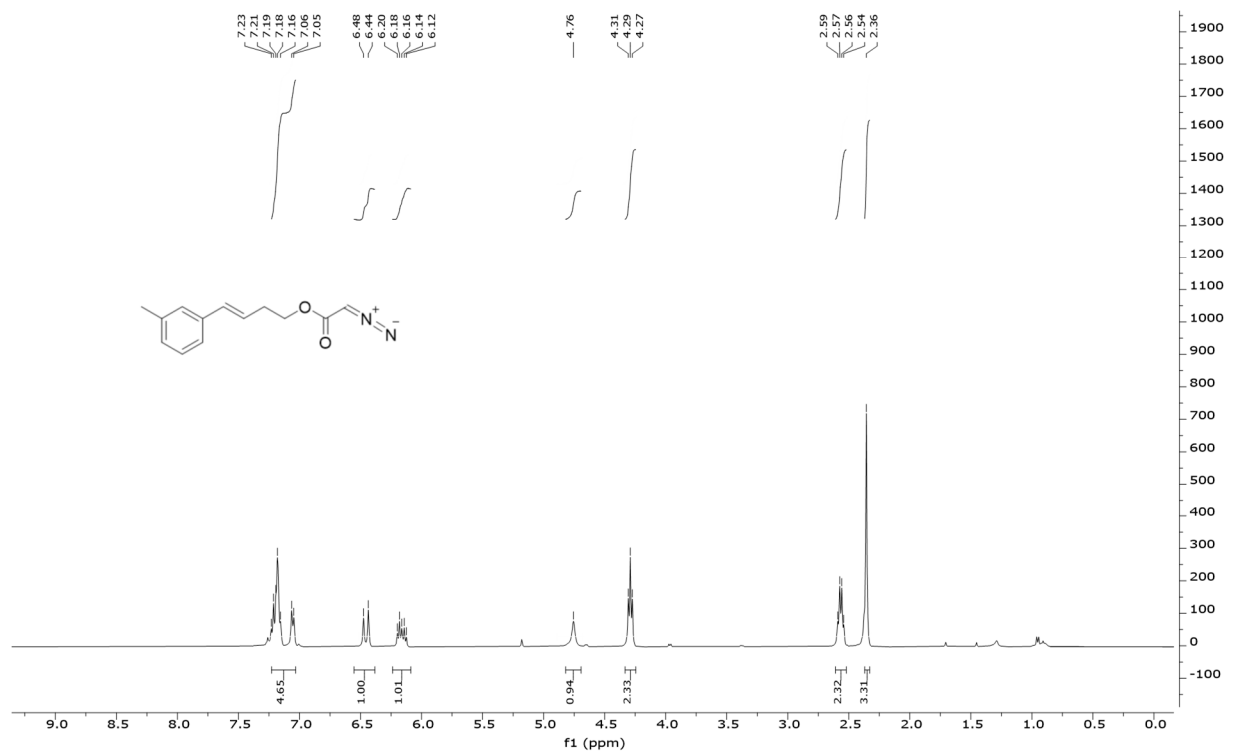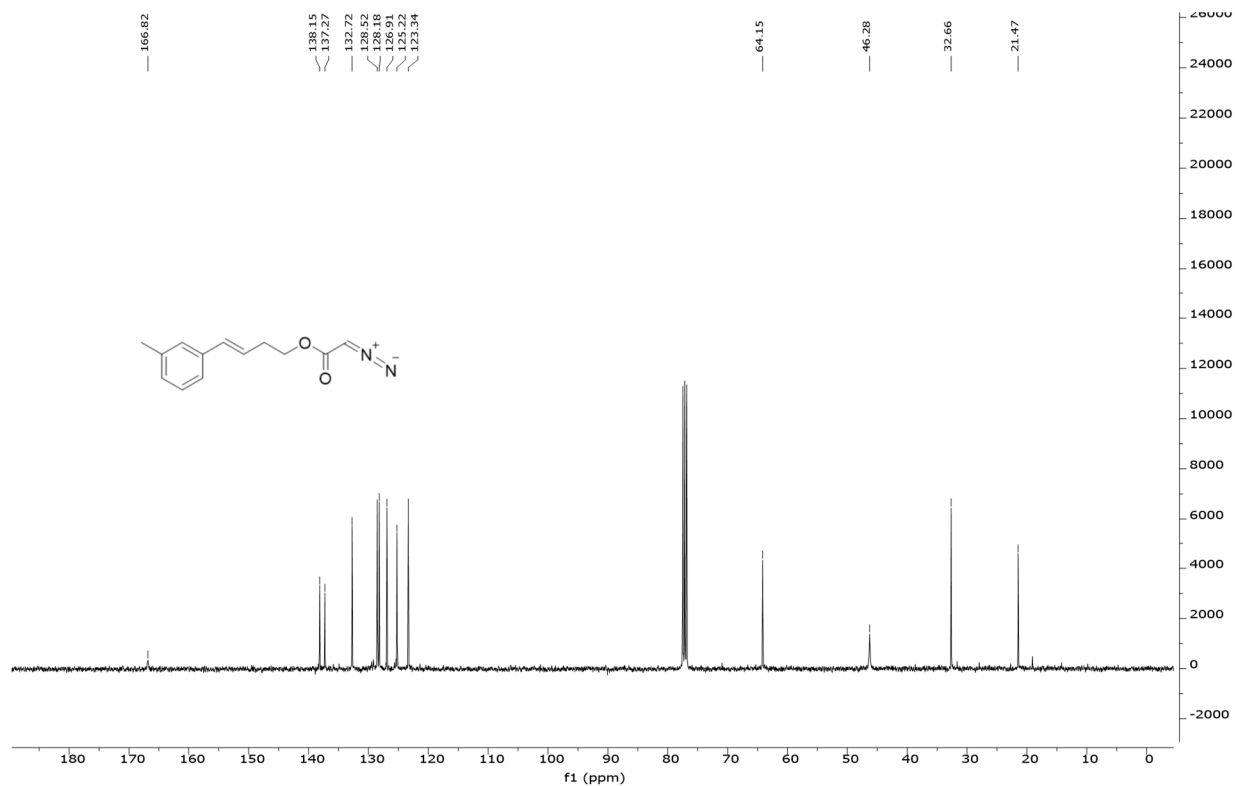

**(E)-4-(o-tolyl)but-3-en-1-yl 2-diazoacetate (1h):** 400 MHz  $^1\text{H}$  spectrum and 101 MHz  $^{13}\text{C}$  spectrum in  $\text{CDCl}_3$  solvent

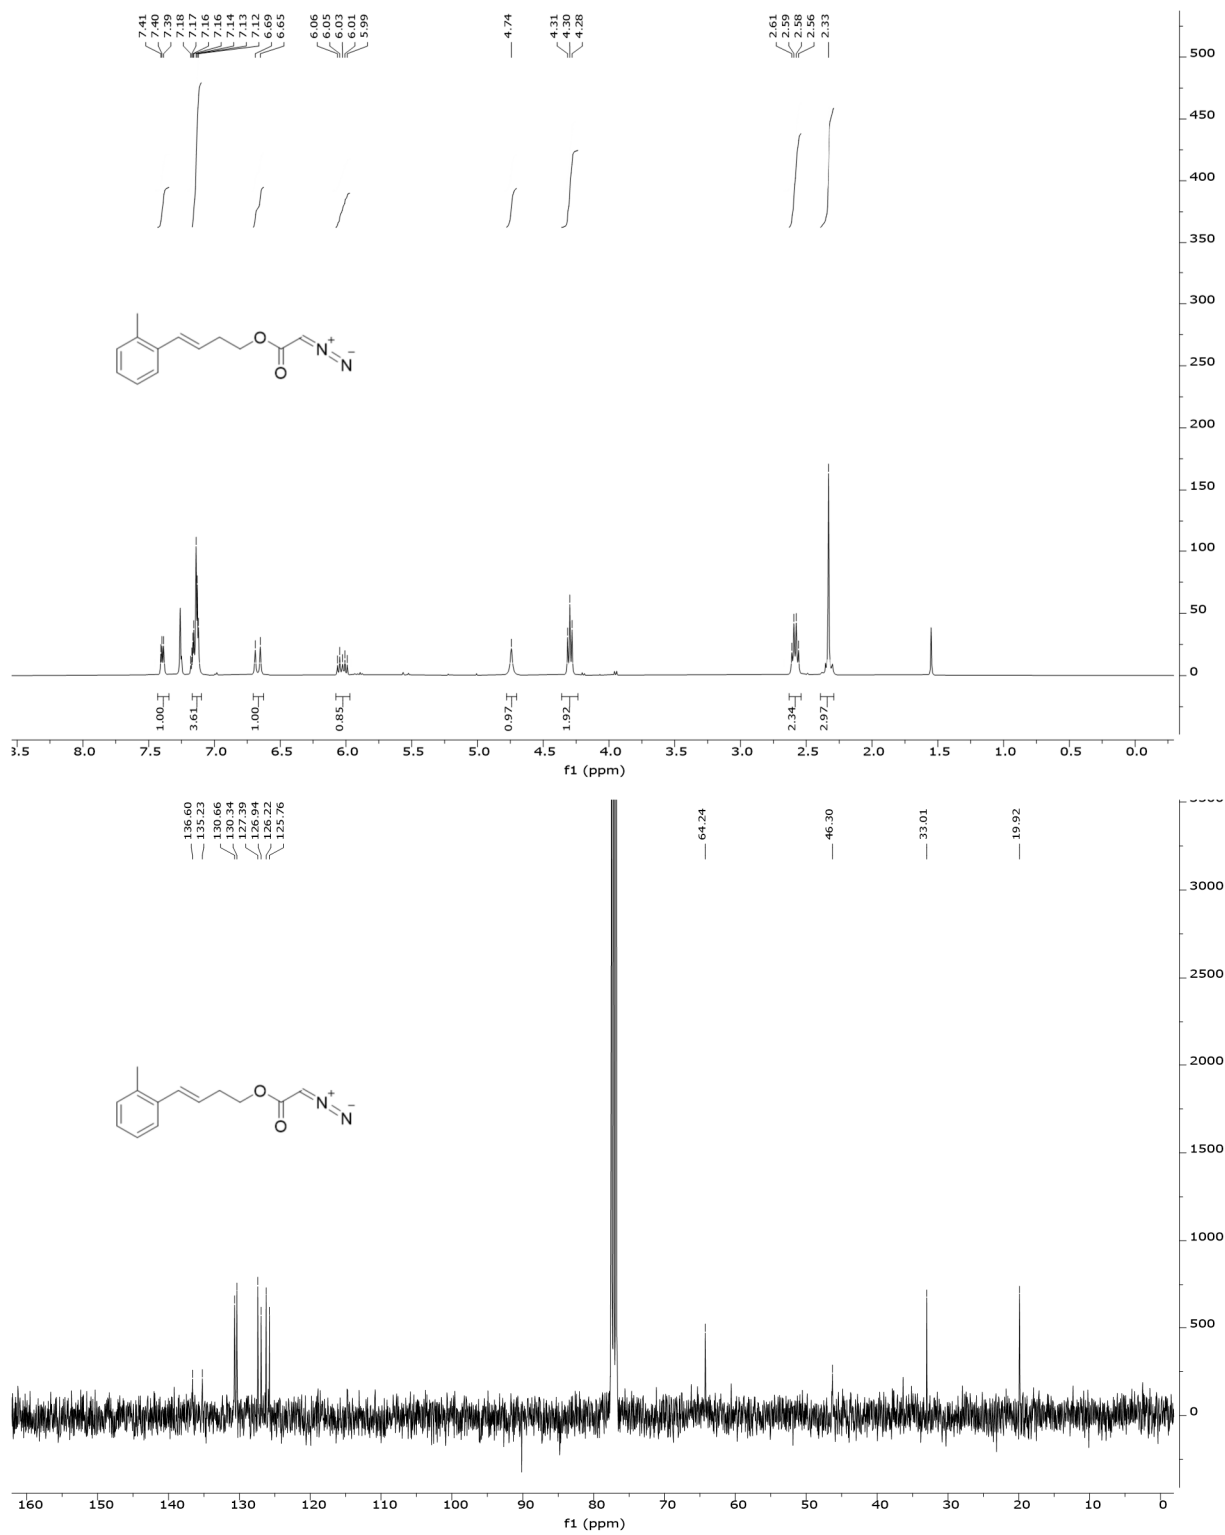

**(E)-4-(2-methoxyphenyl)but-3-en-1-yl 2-diazoacetate (1i):** 400 MHz  $^1\text{H}$  spectrum and 101 MHz  $^{13}\text{C}$  spectrum in  $\text{CDCl}_3$  solvent

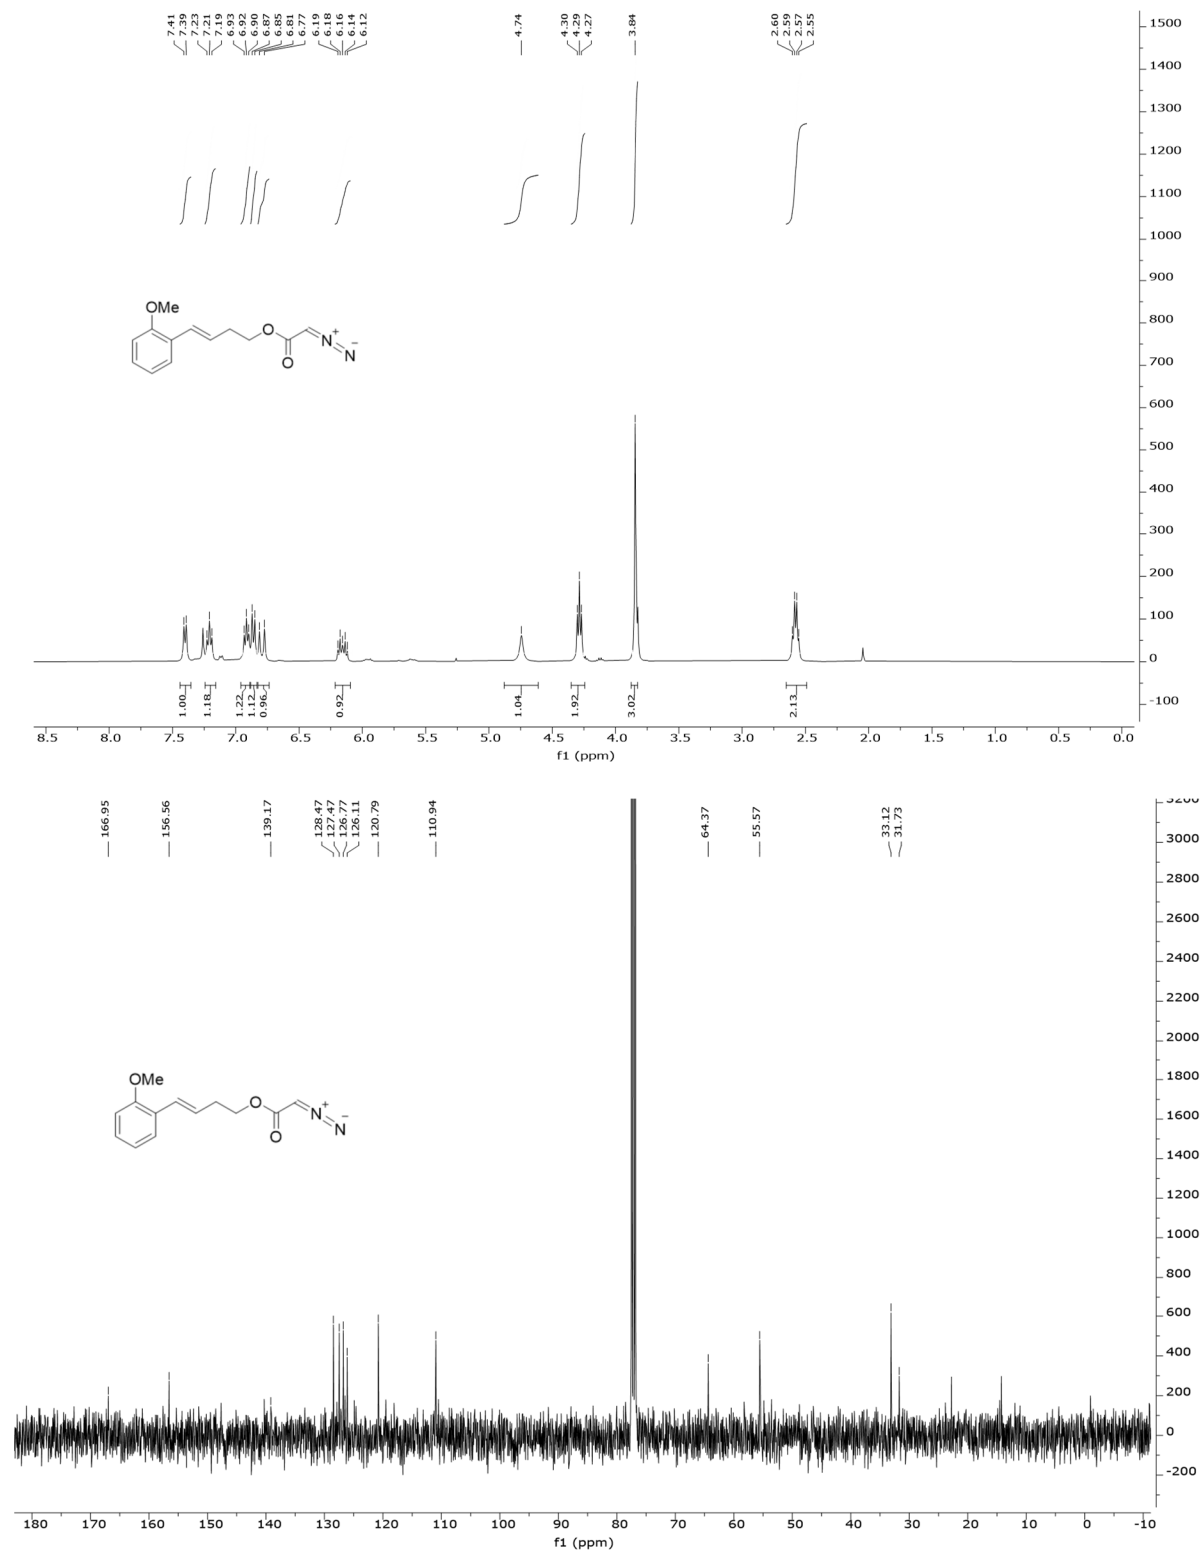

**4-methylpent-3-en-1-yl 2-diazoacetate (1j):** 400 MHz  $^1\text{H}$  spectrum and 101 MHz  $^{13}\text{C}$  spectrum in  $\text{CDCl}_3$  solvent

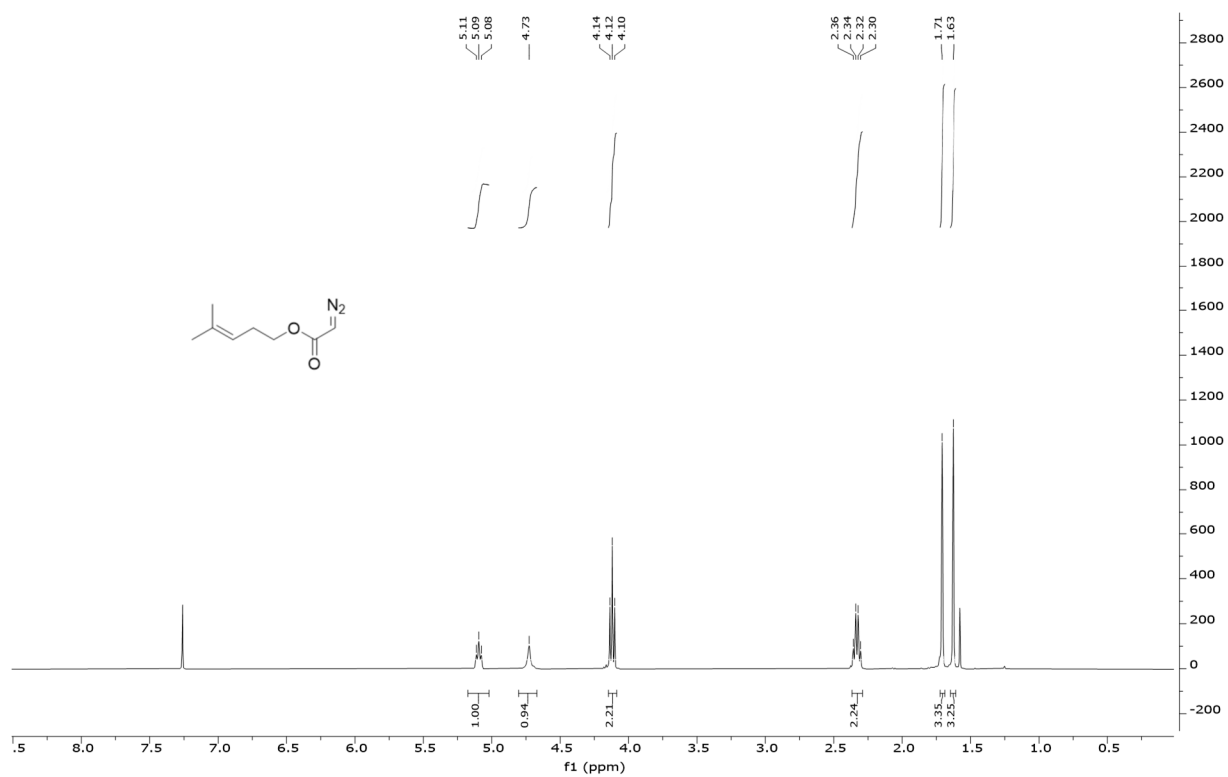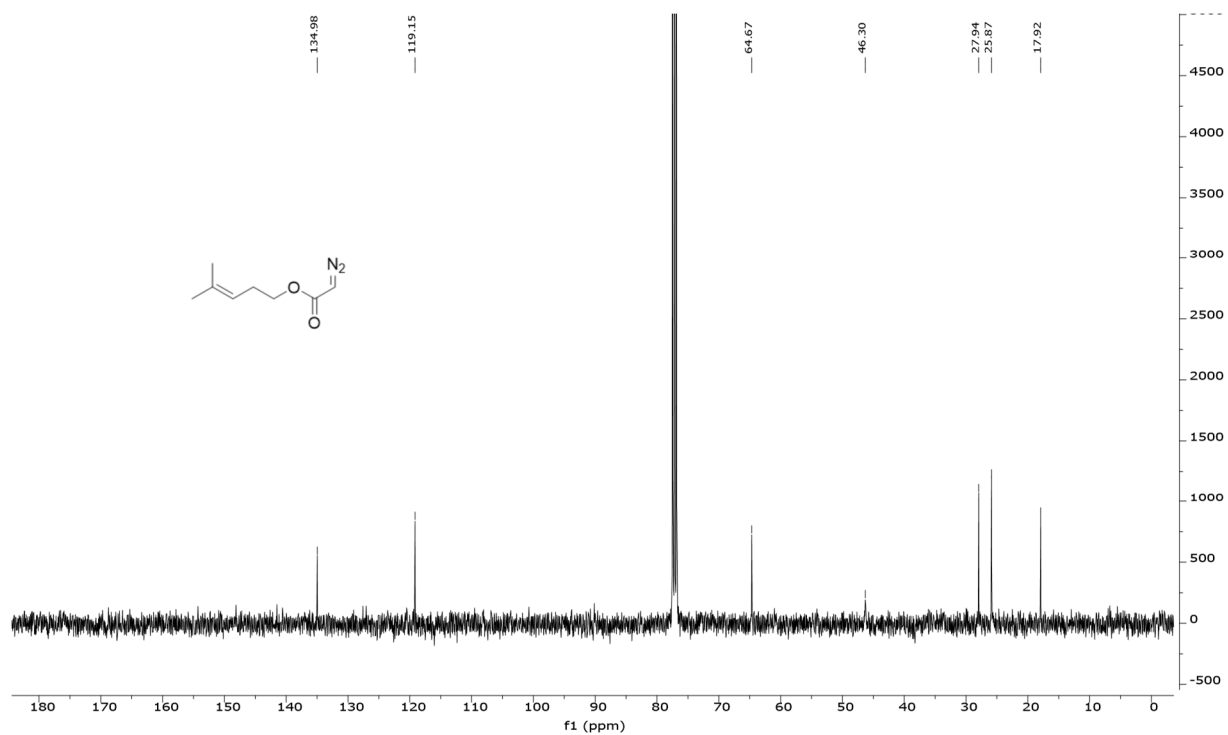

(1*S*,6*S*,7*S*)-7-phenyl-3-oxabicyclo[4.1.0]heptan-2-one (2a): 400 MHz <sup>1</sup>H spectrum and 101 MHz <sup>13</sup>C spectrum in CDCl<sub>3</sub> solvent

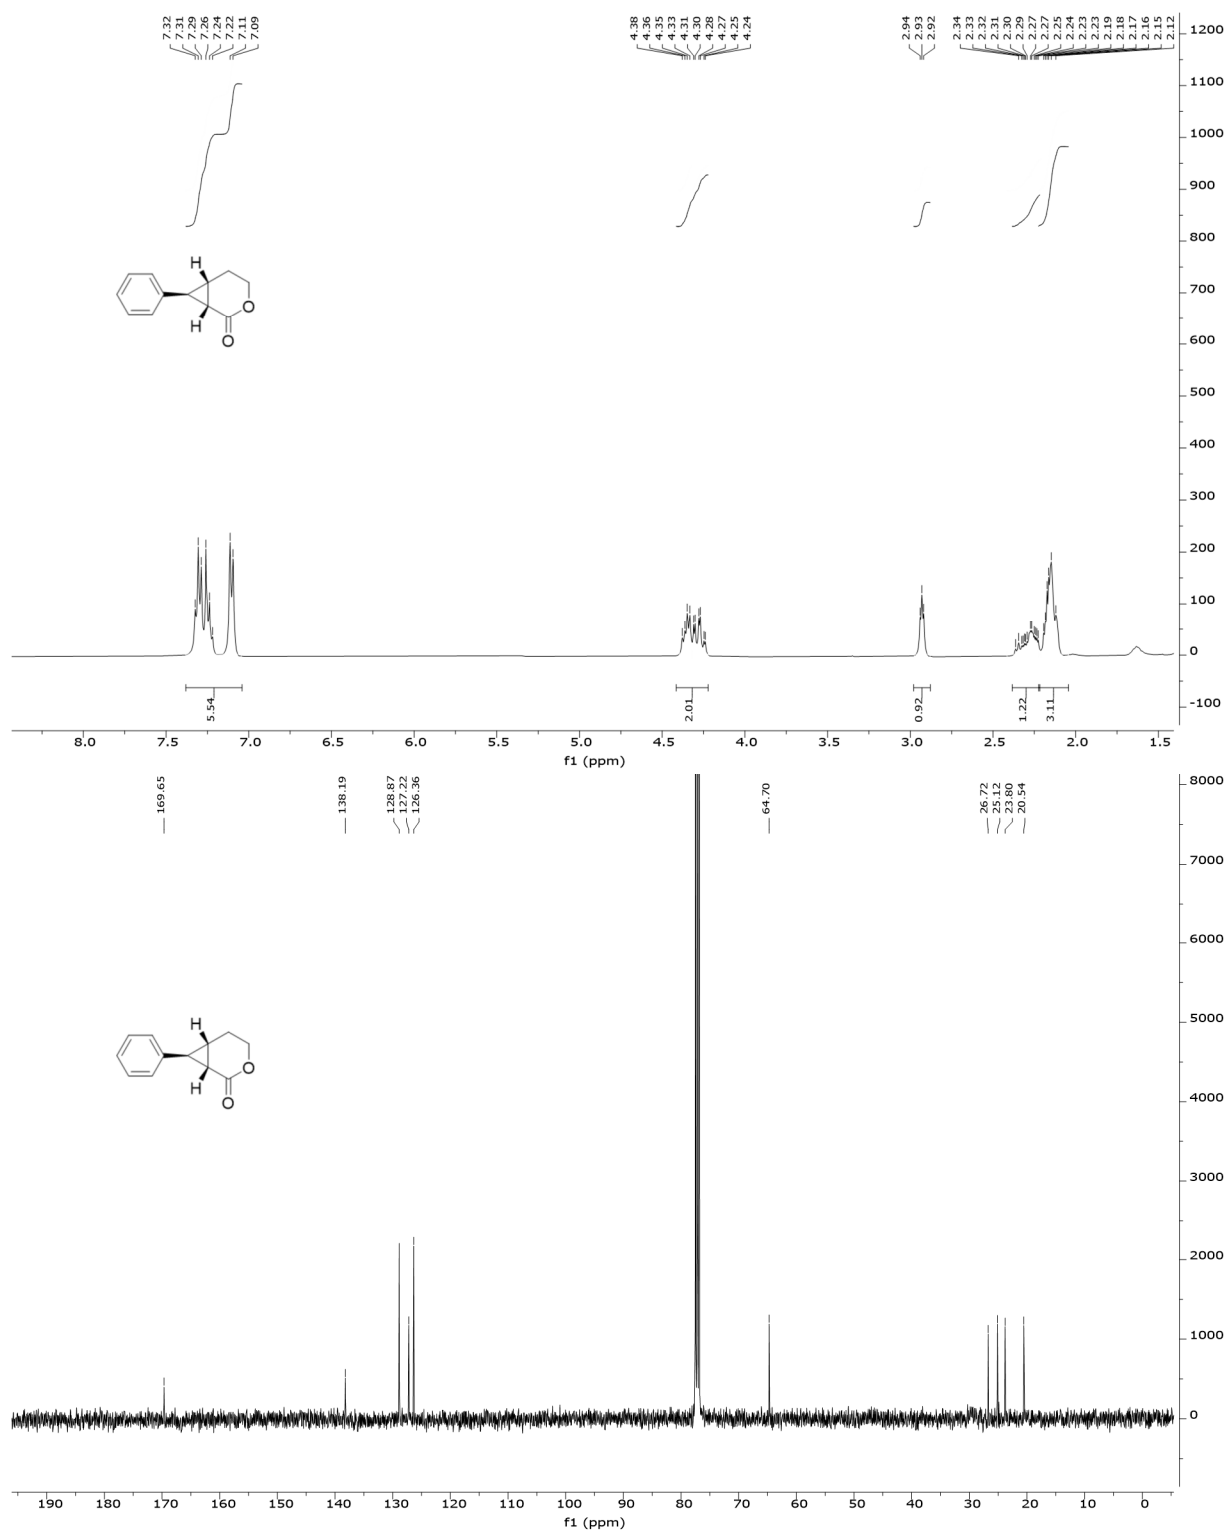



**(1S,6S,7S)-7-(4-fluorophenyl)-3-oxabicyclo[4.1.0]heptan-2-one (2b):** 400 MHz  $^1\text{H}$  spectrum and 101 MHz  $^{13}\text{C}$  spectrum in  $\text{CDCl}_3$  solvent, 376 MHz  $^{19}\text{F}$  spectrum in  $\text{C}_6\text{D}_6$

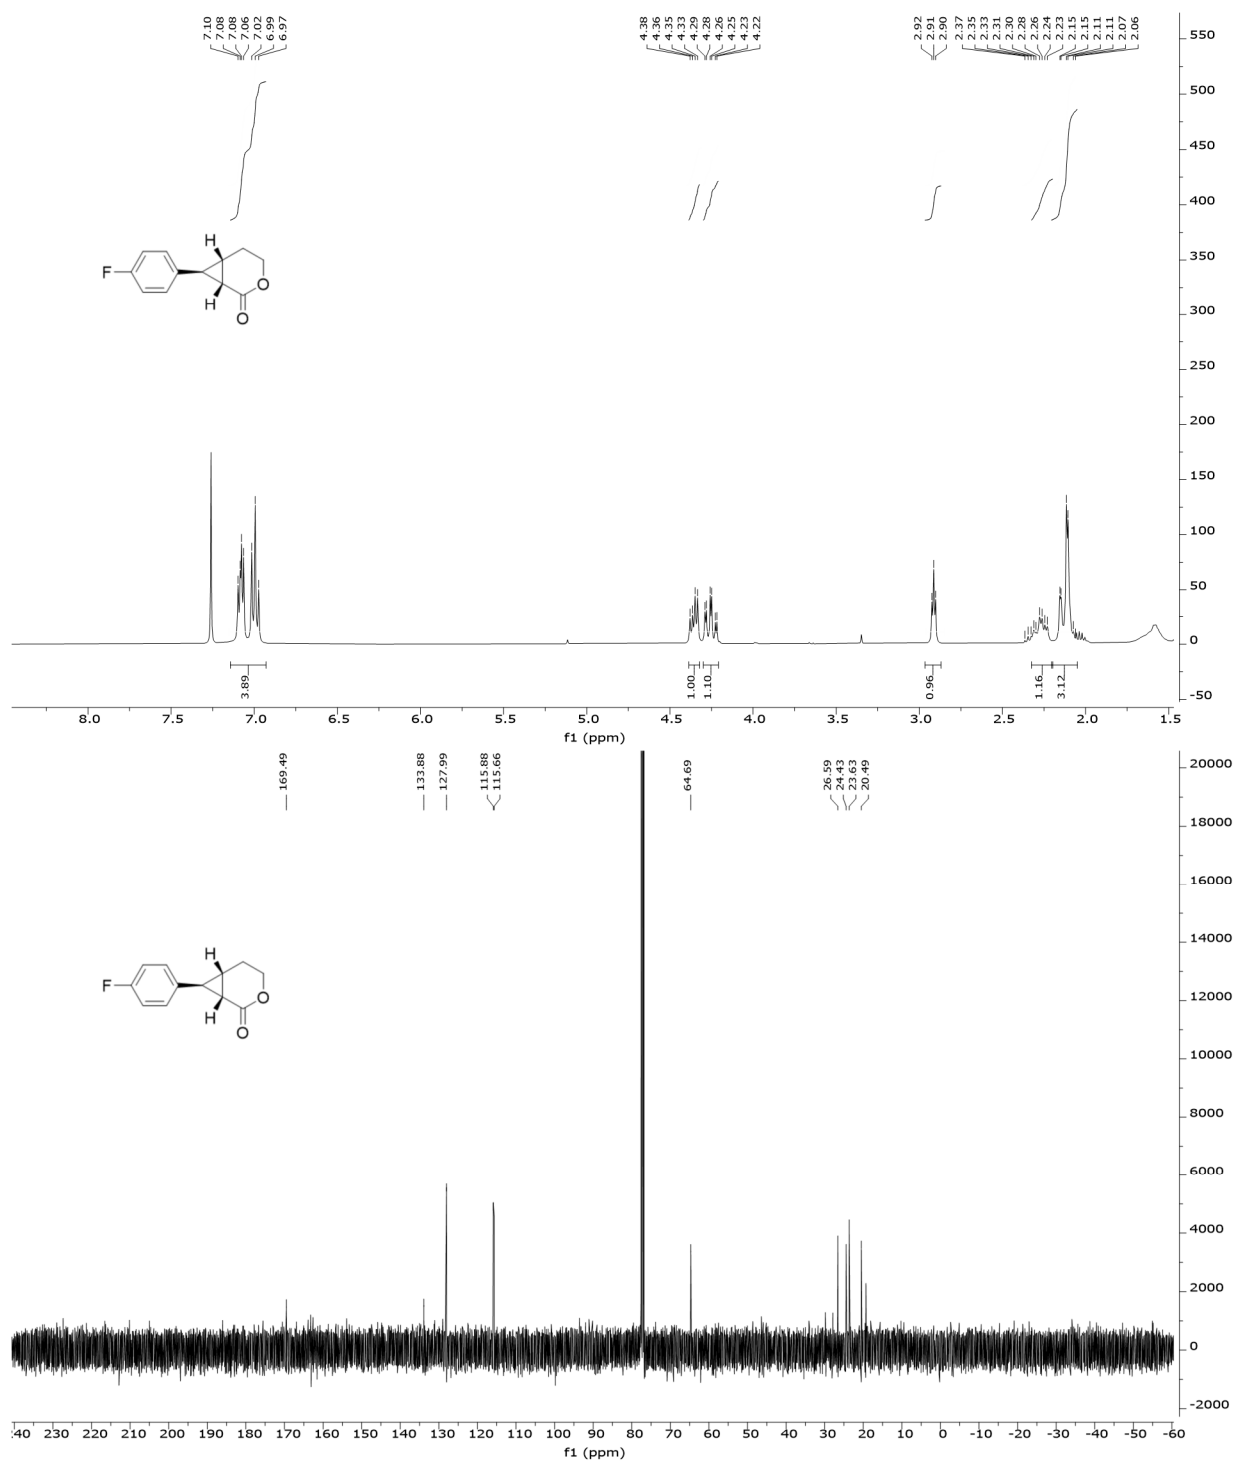

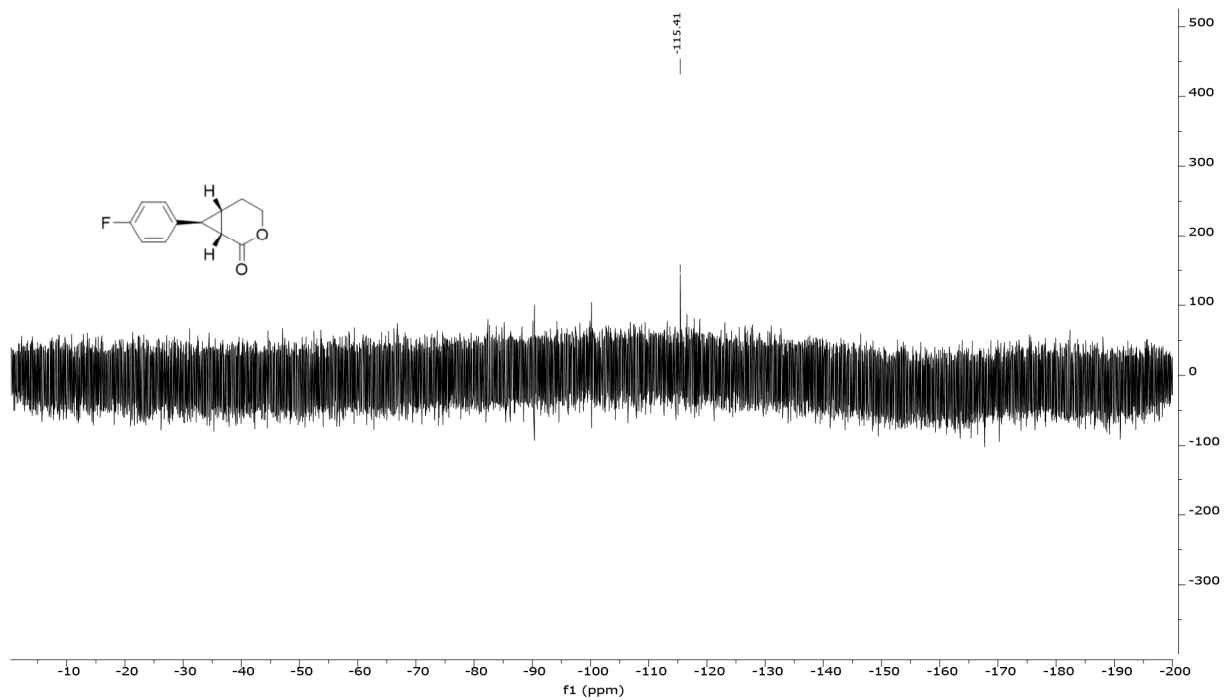

**(1S,6S,7S)-7-(4-chlorophenyl)-3-oxabicyclo[4.1.0]heptan-2-one (2c):** 400 MHz  $^1\text{H}$  spectrum and 101 MHz  $^{13}\text{C}$  spectrum in  $\text{CDCl}_3$  solvent

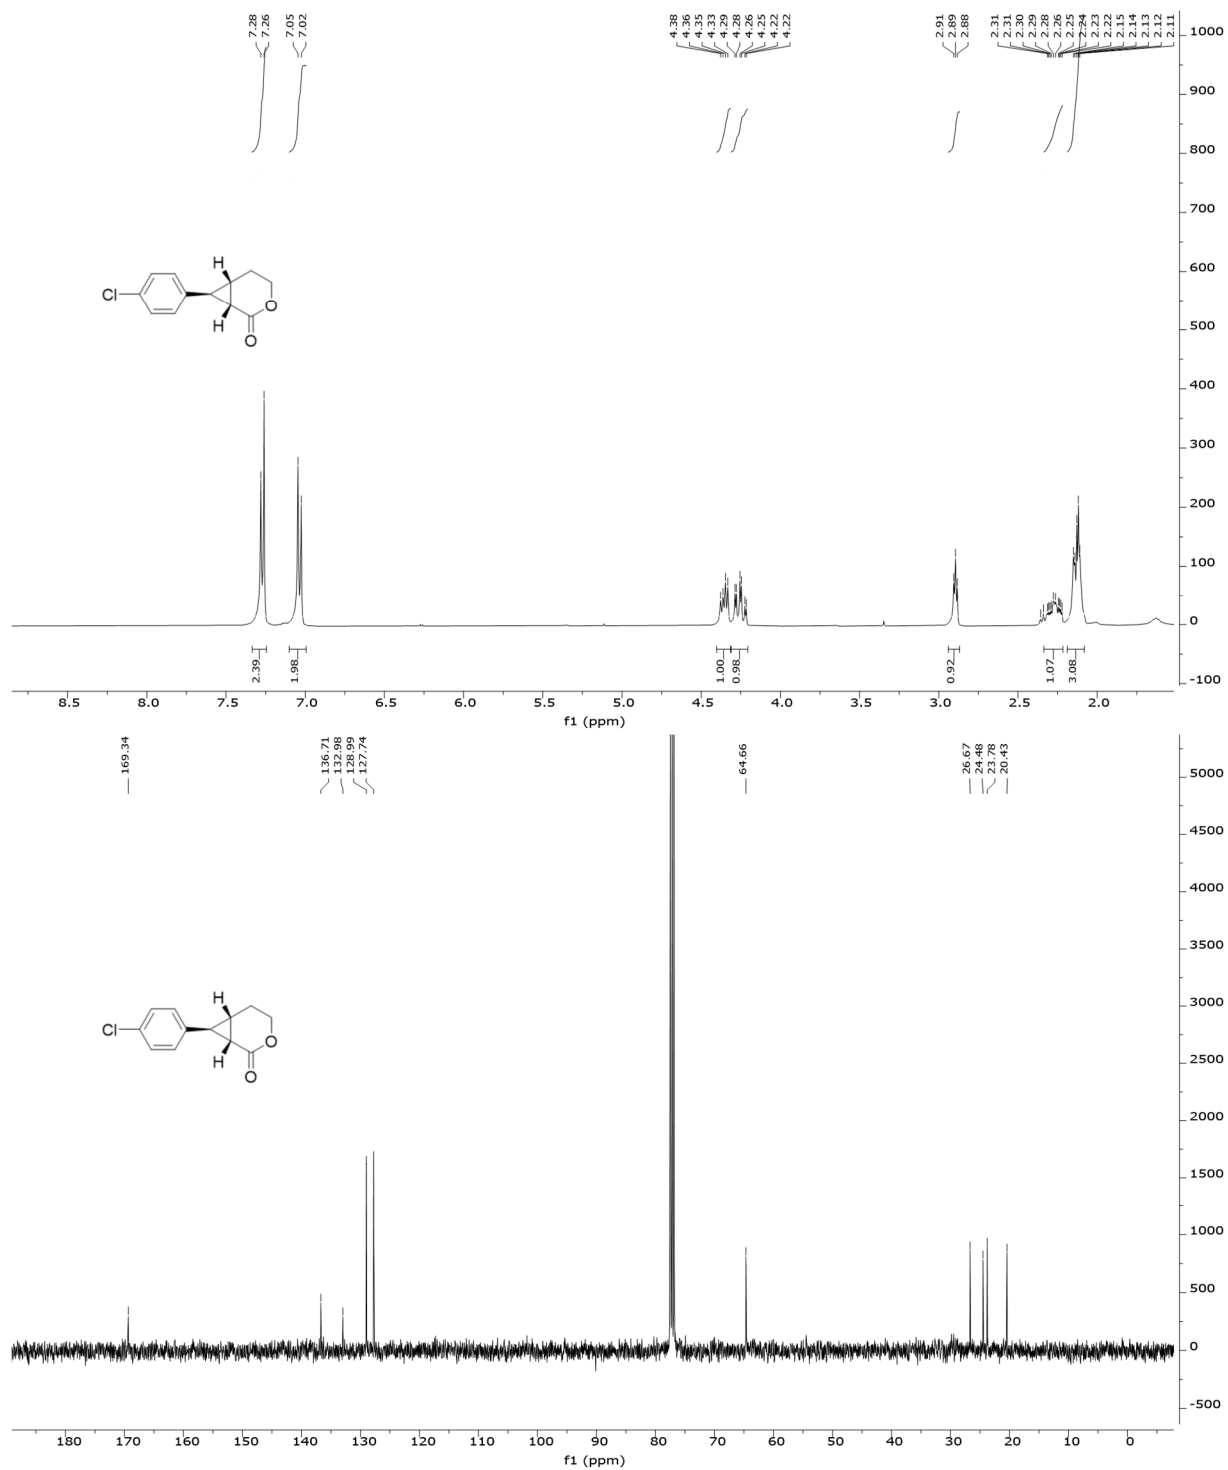

**(1S,6S,7S)-7-(4-bromophenyl)-3-oxabicyclo[4.1.0]heptan-2-one (2d):** 400 MHz  $^1\text{H}$  spectrum and 101 MHz  $^{13}\text{C}$  spectrum in  $\text{CDCl}_3$  solvent

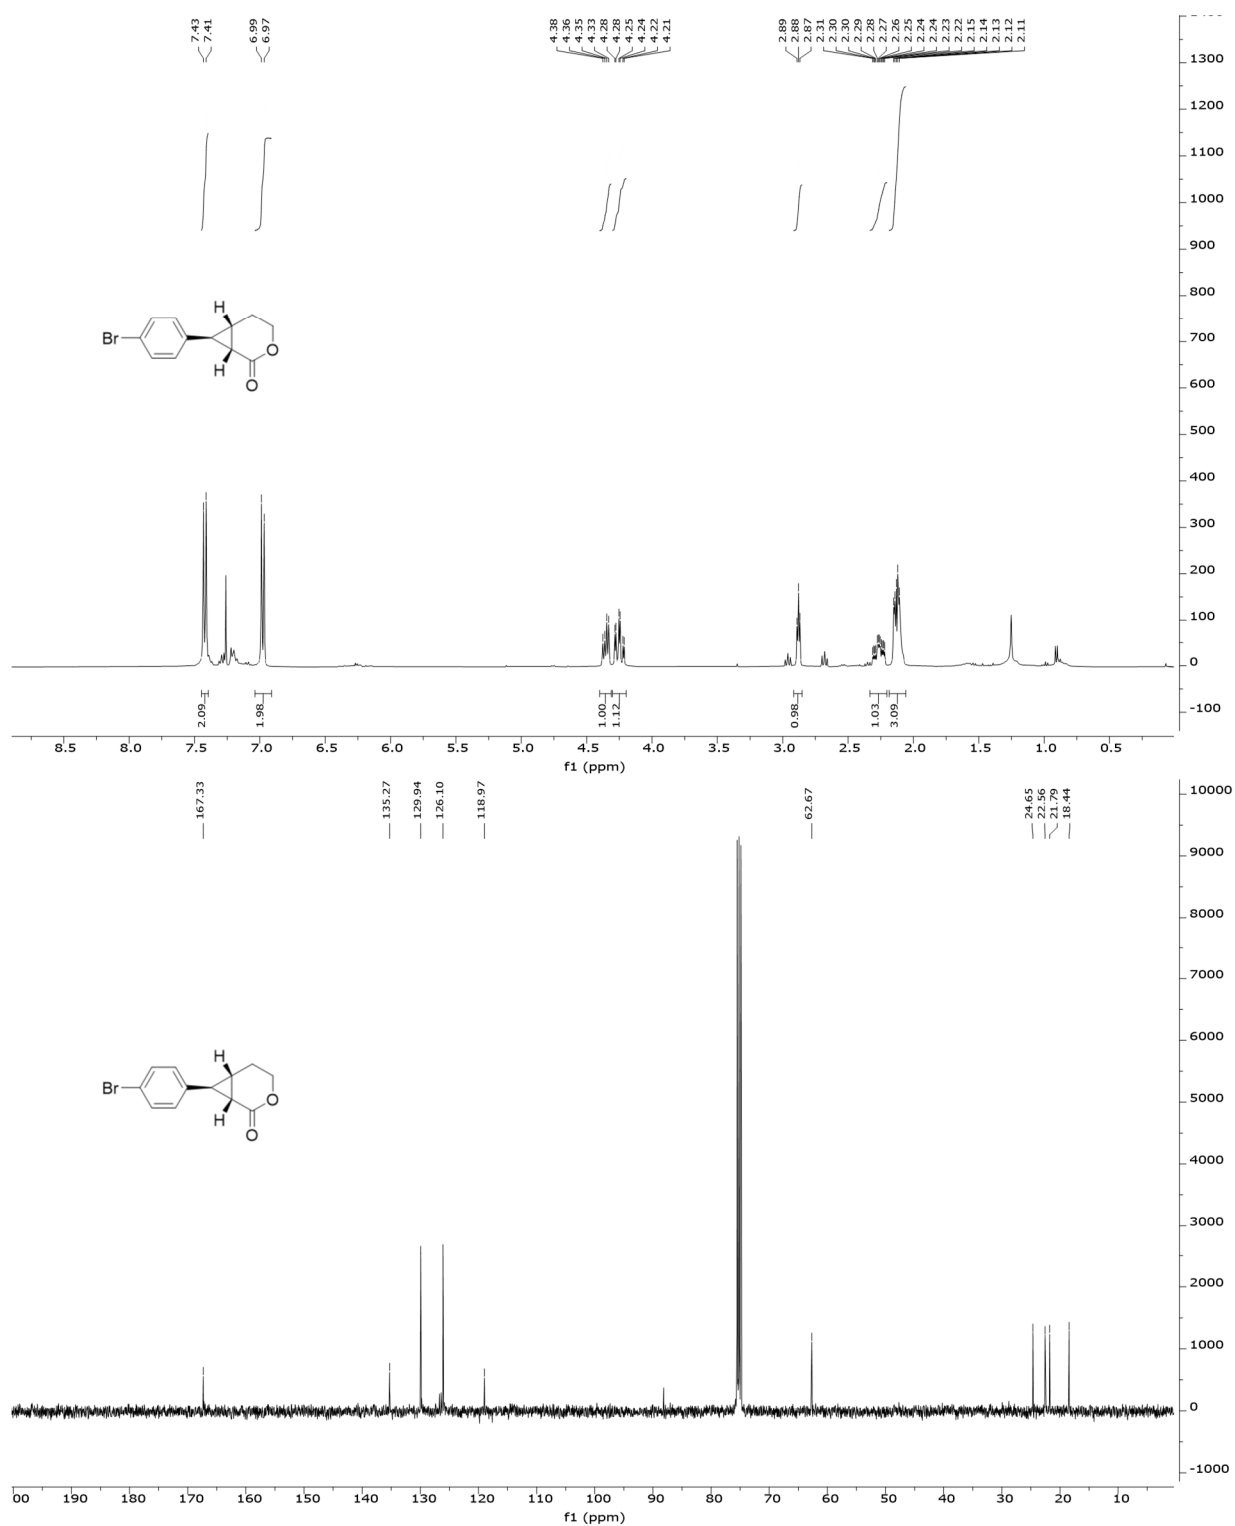

**(1S,6S,7S)-7-(4-(trifluoromethyl)phenyl)-3-oxabicyclo[4.1.0]heptan-2-one (2e):** 400 MHz  $^1\text{H}$  spectrum and 101 MHz  $^{13}\text{C}$  spectrum in  $\text{CDCl}_3$  solvent, 376 MHz  $^{19}\text{F}$  spectrum in  $\text{C}_6\text{D}_6$

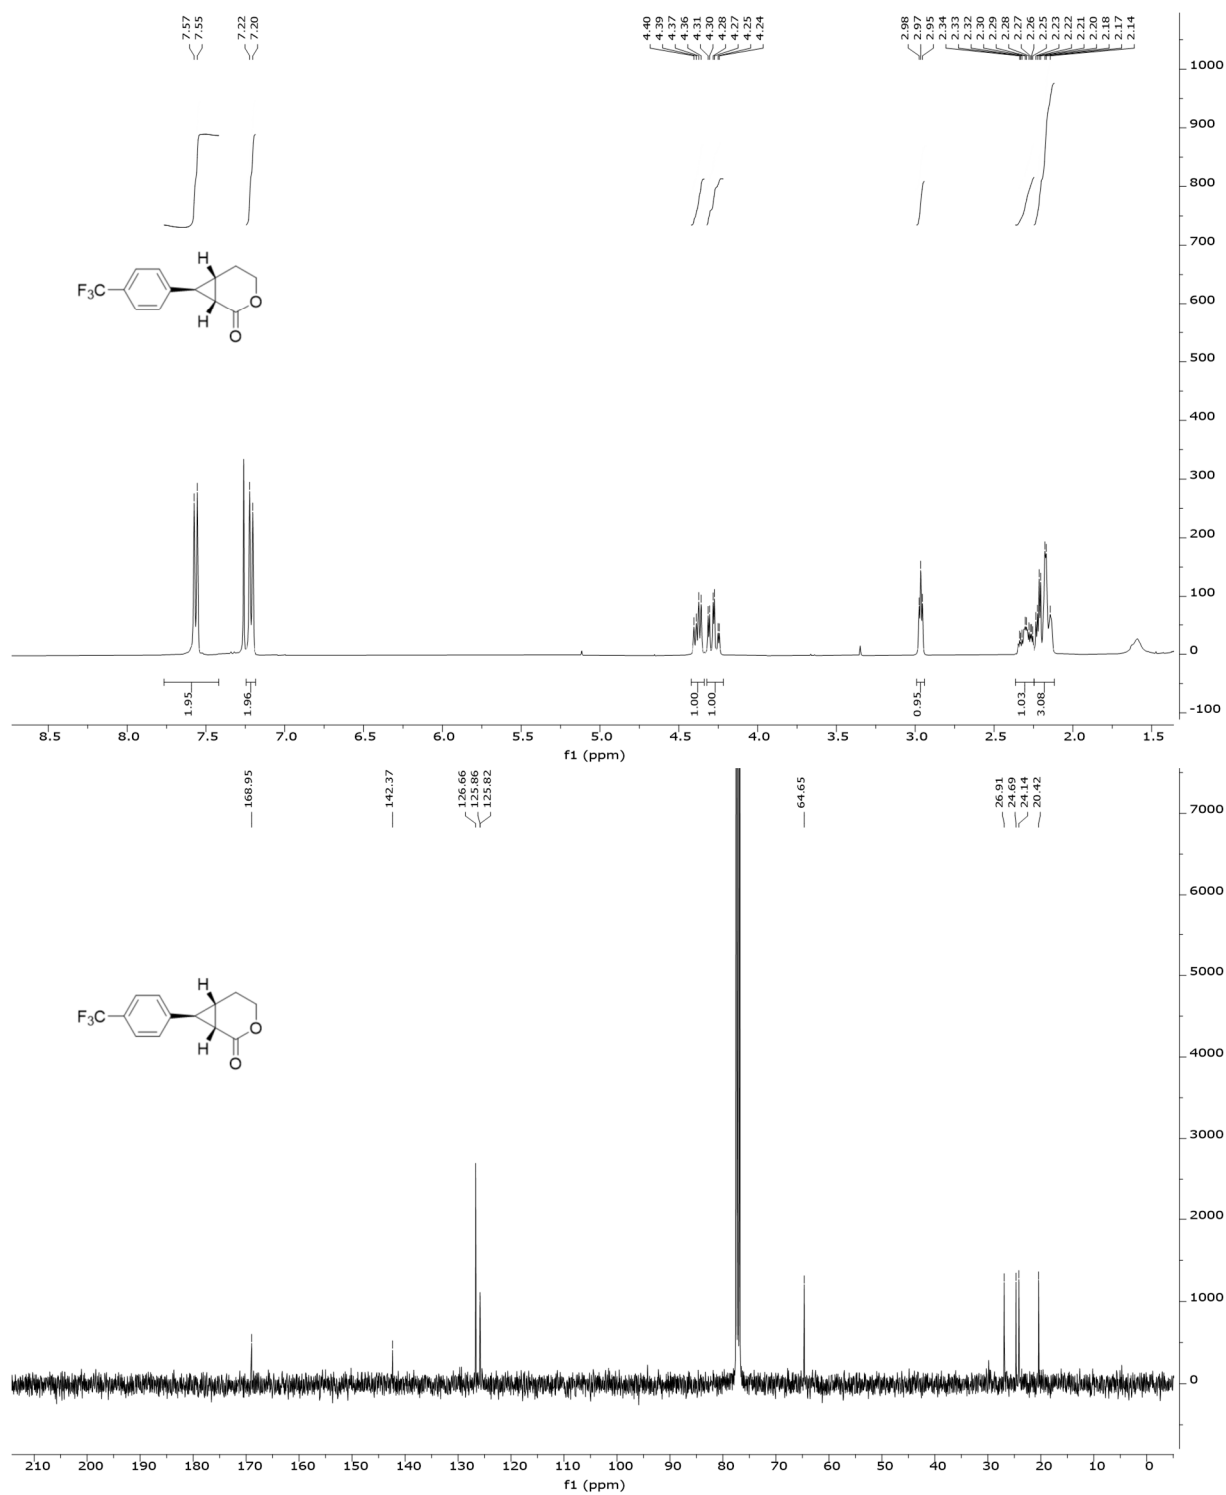

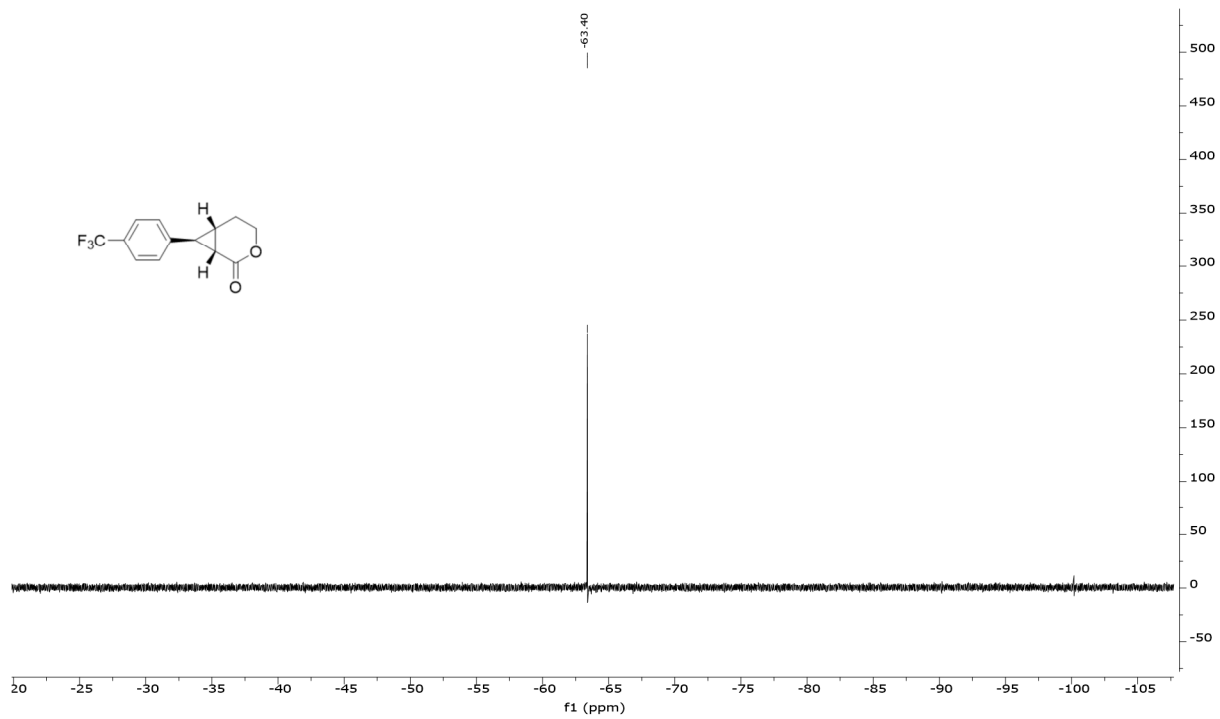

(1*S*,6*S*,7*S*)-7-(*p*-tolyl)-3-oxabicyclo[4.1.0]heptan-2-one (**2f**): 400 MHz <sup>1</sup>H spectrum and 101 MHz <sup>13</sup>C spectrum in CDCl<sub>3</sub> solvent

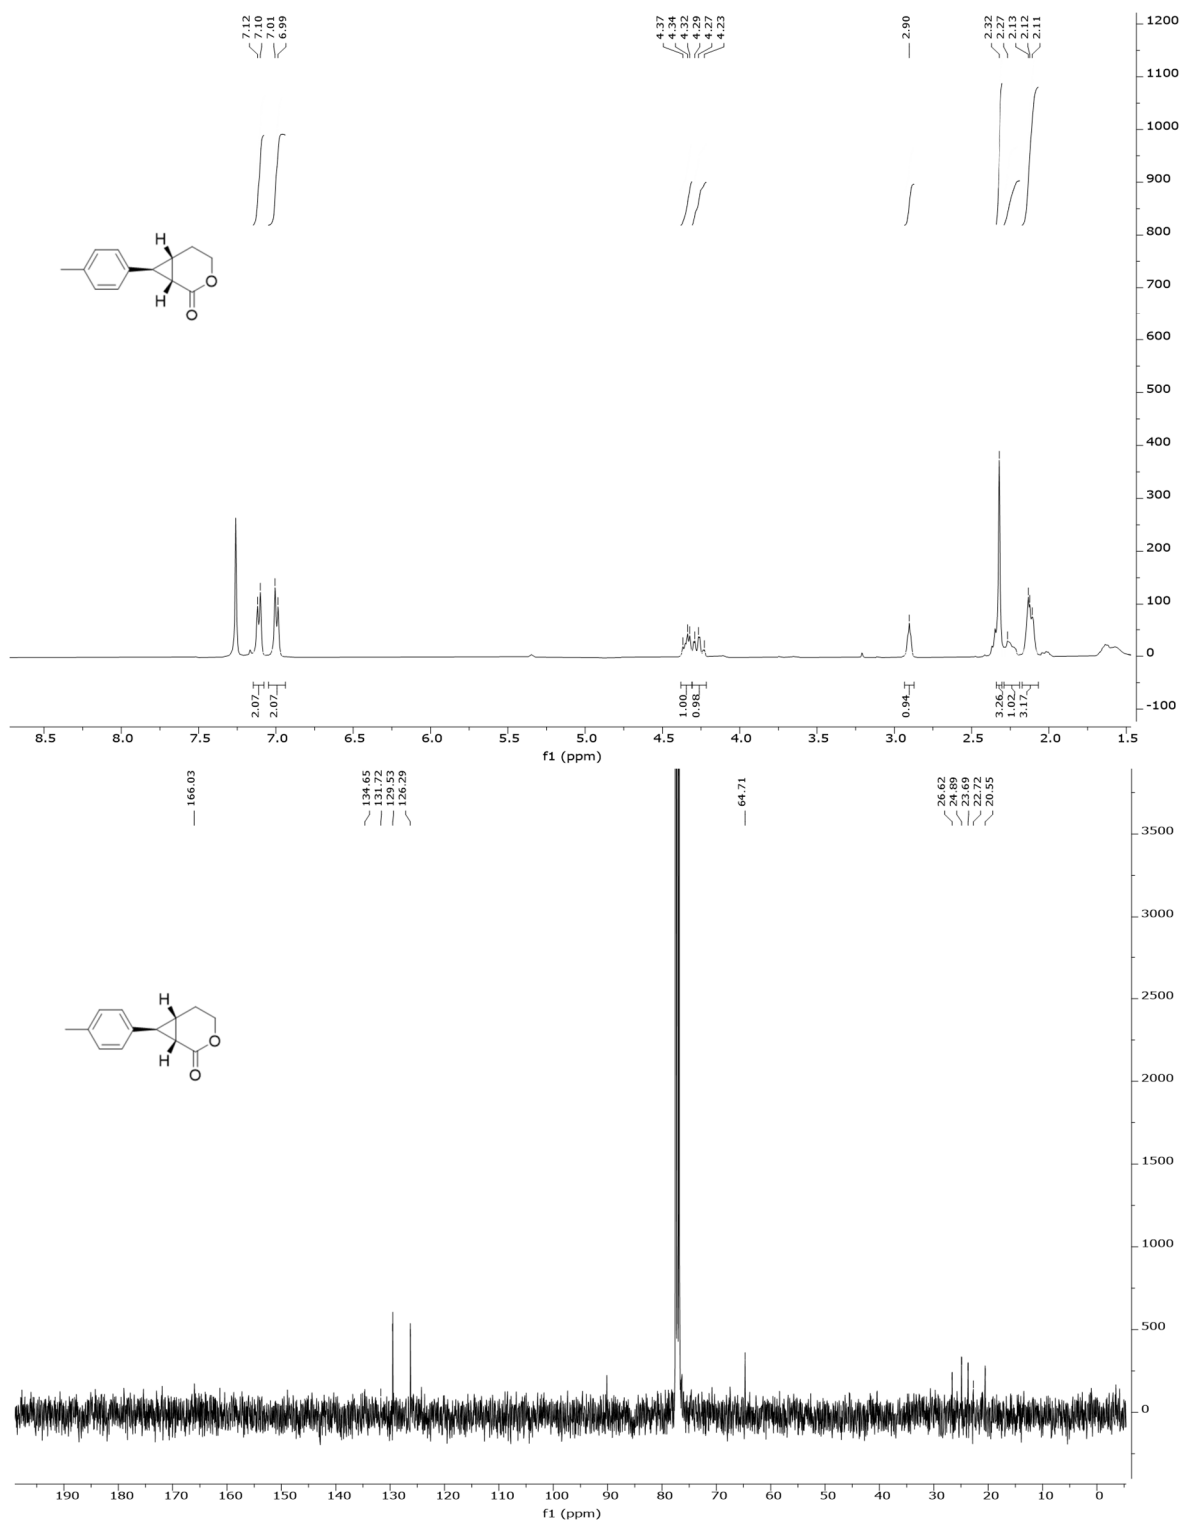

(1*S*,6*S*,7*S*)-7-(*m*-tolyl)-3-oxabicyclo[4.1.0]heptan-2-one (2g): 400 MHz <sup>1</sup>H spectrum and 101 MHz <sup>13</sup>C spectrum in CDCl<sub>3</sub> solvent

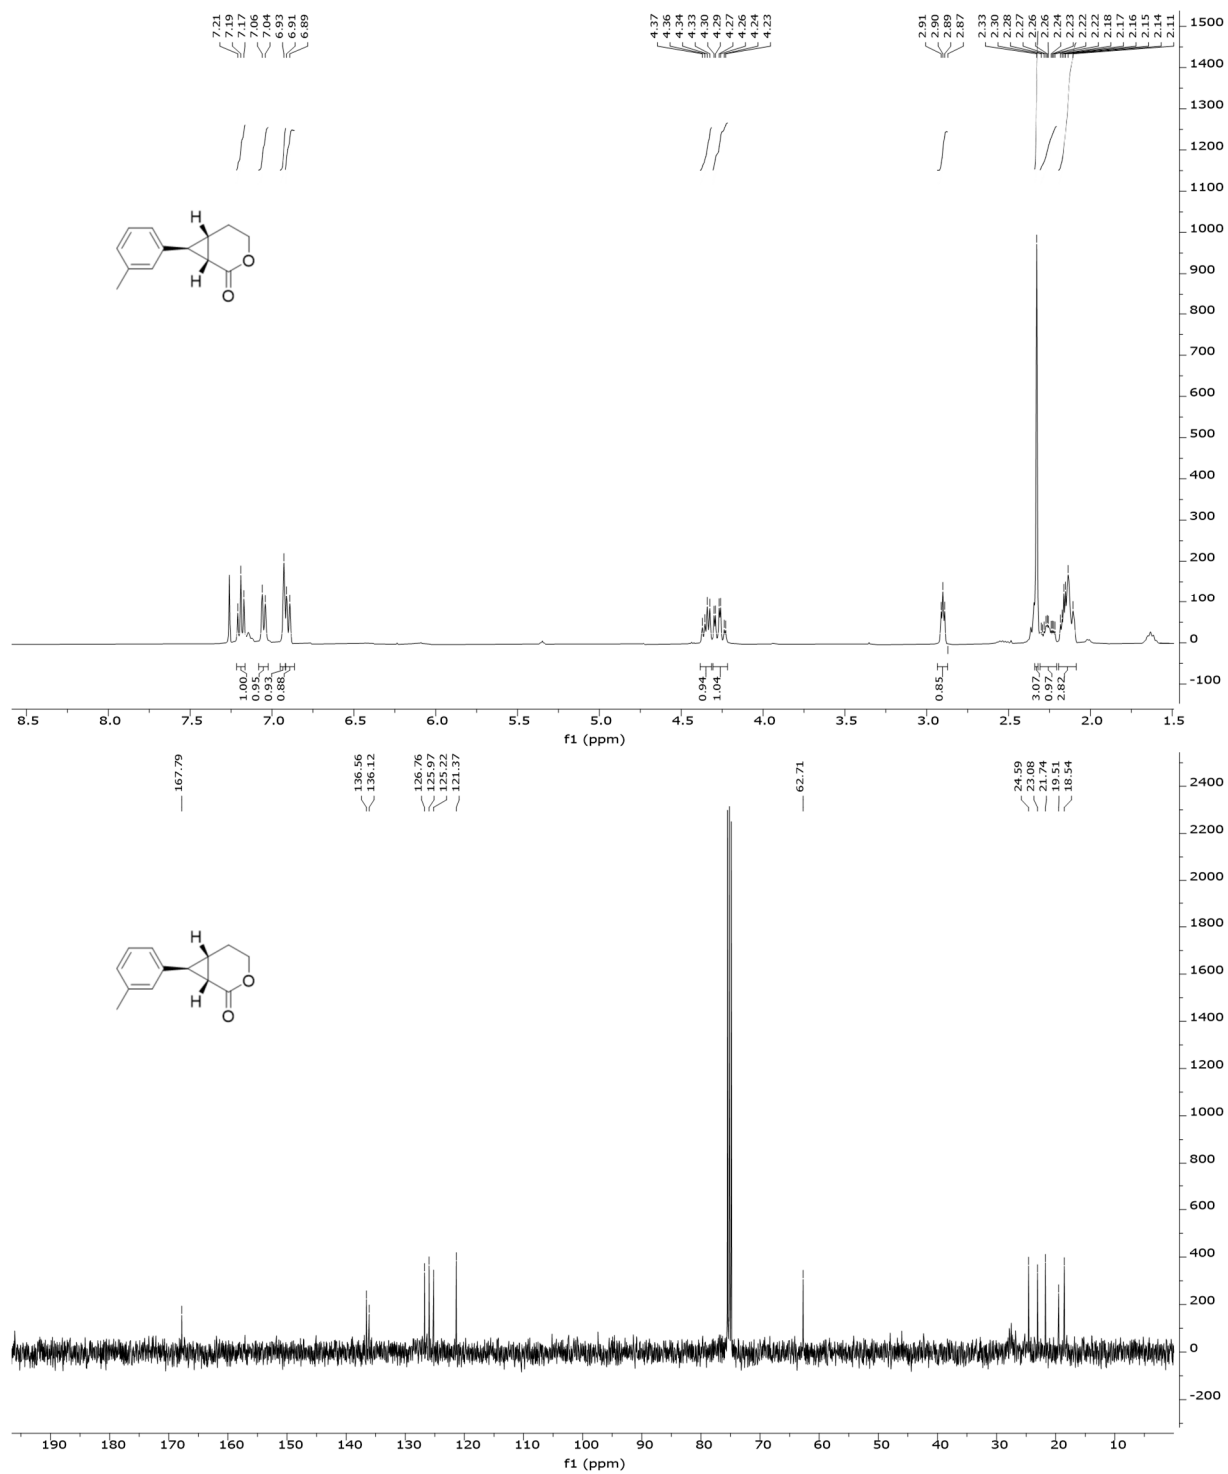



(1*S*,6*S*,7*S*)-7-(*o*-tolyl)-3-oxabicyclo[4.1.0]heptan-2-one (**2h**): 400 MHz <sup>1</sup>H spectrum and 101 MHz <sup>13</sup>C spectrum in CDCl<sub>3</sub> solvent

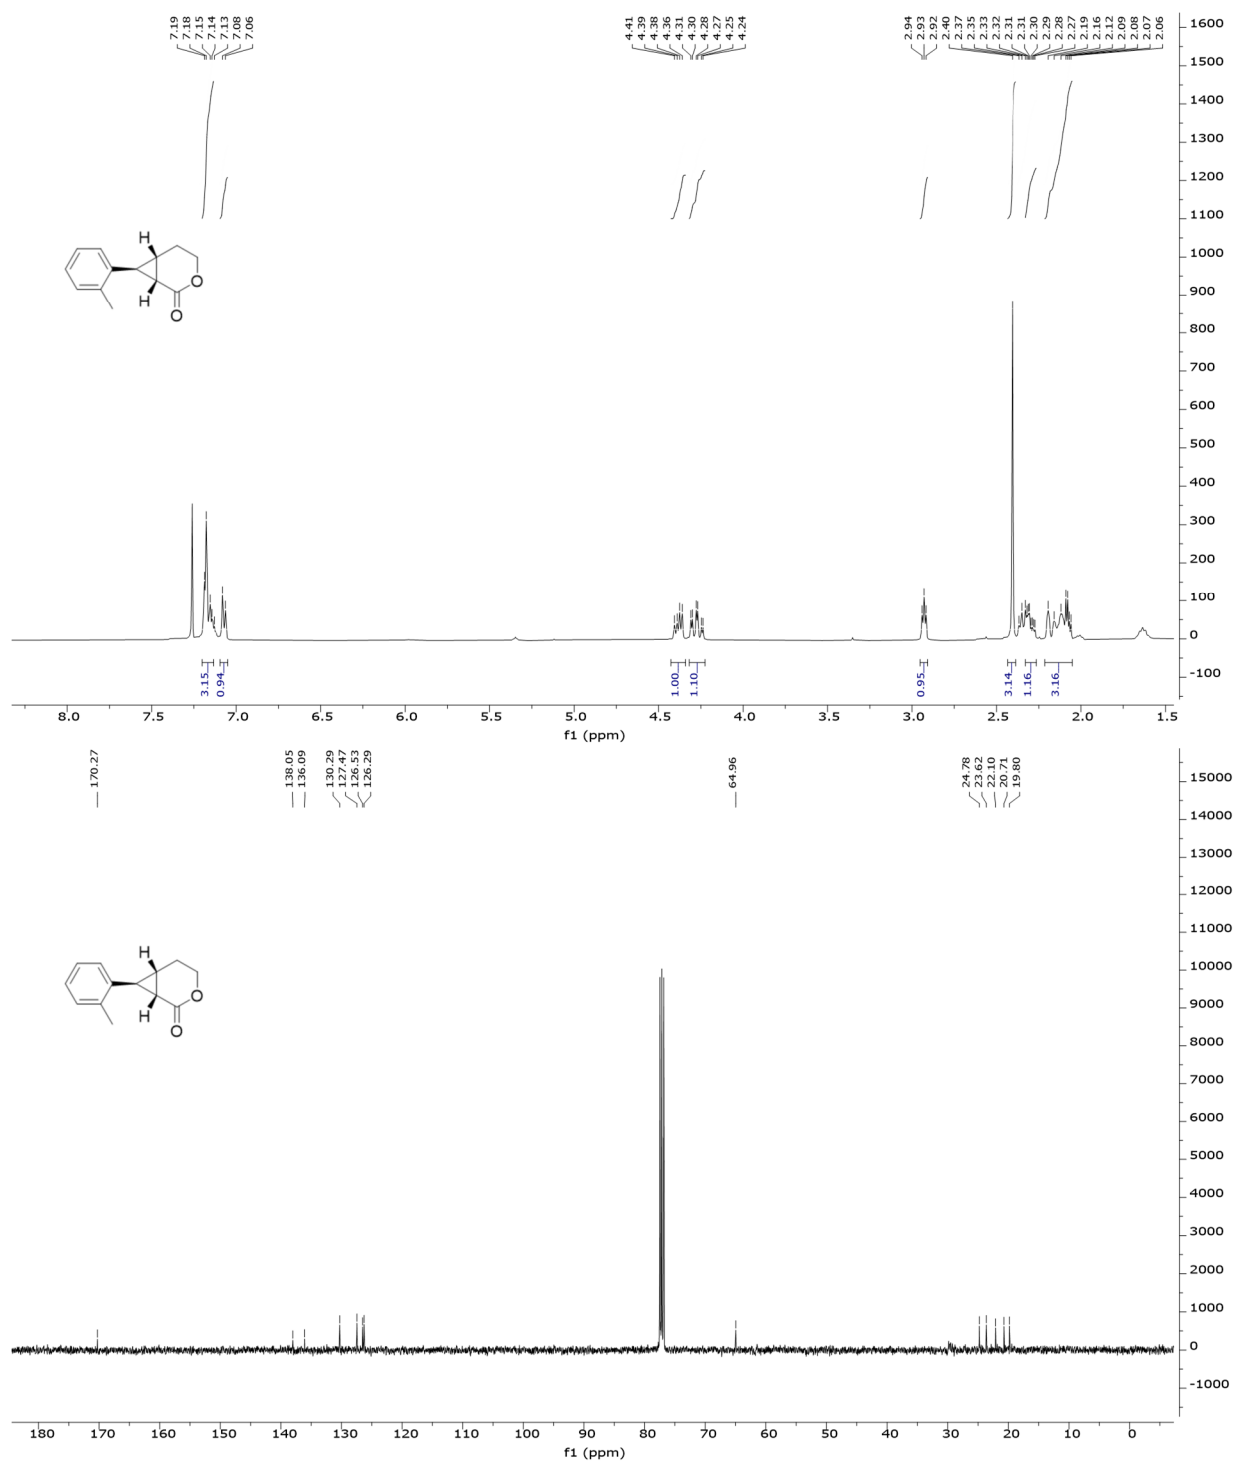

**(1*S*,6*S*,7*S*)-7-(2-methoxyphenyl)-3-oxabicyclo[4.1.0]heptan-2-one (2i):** 400 MHz <sup>1</sup>H spectrum and 101 MHz <sup>13</sup>C spectrum in CDCl<sub>3</sub> solvent

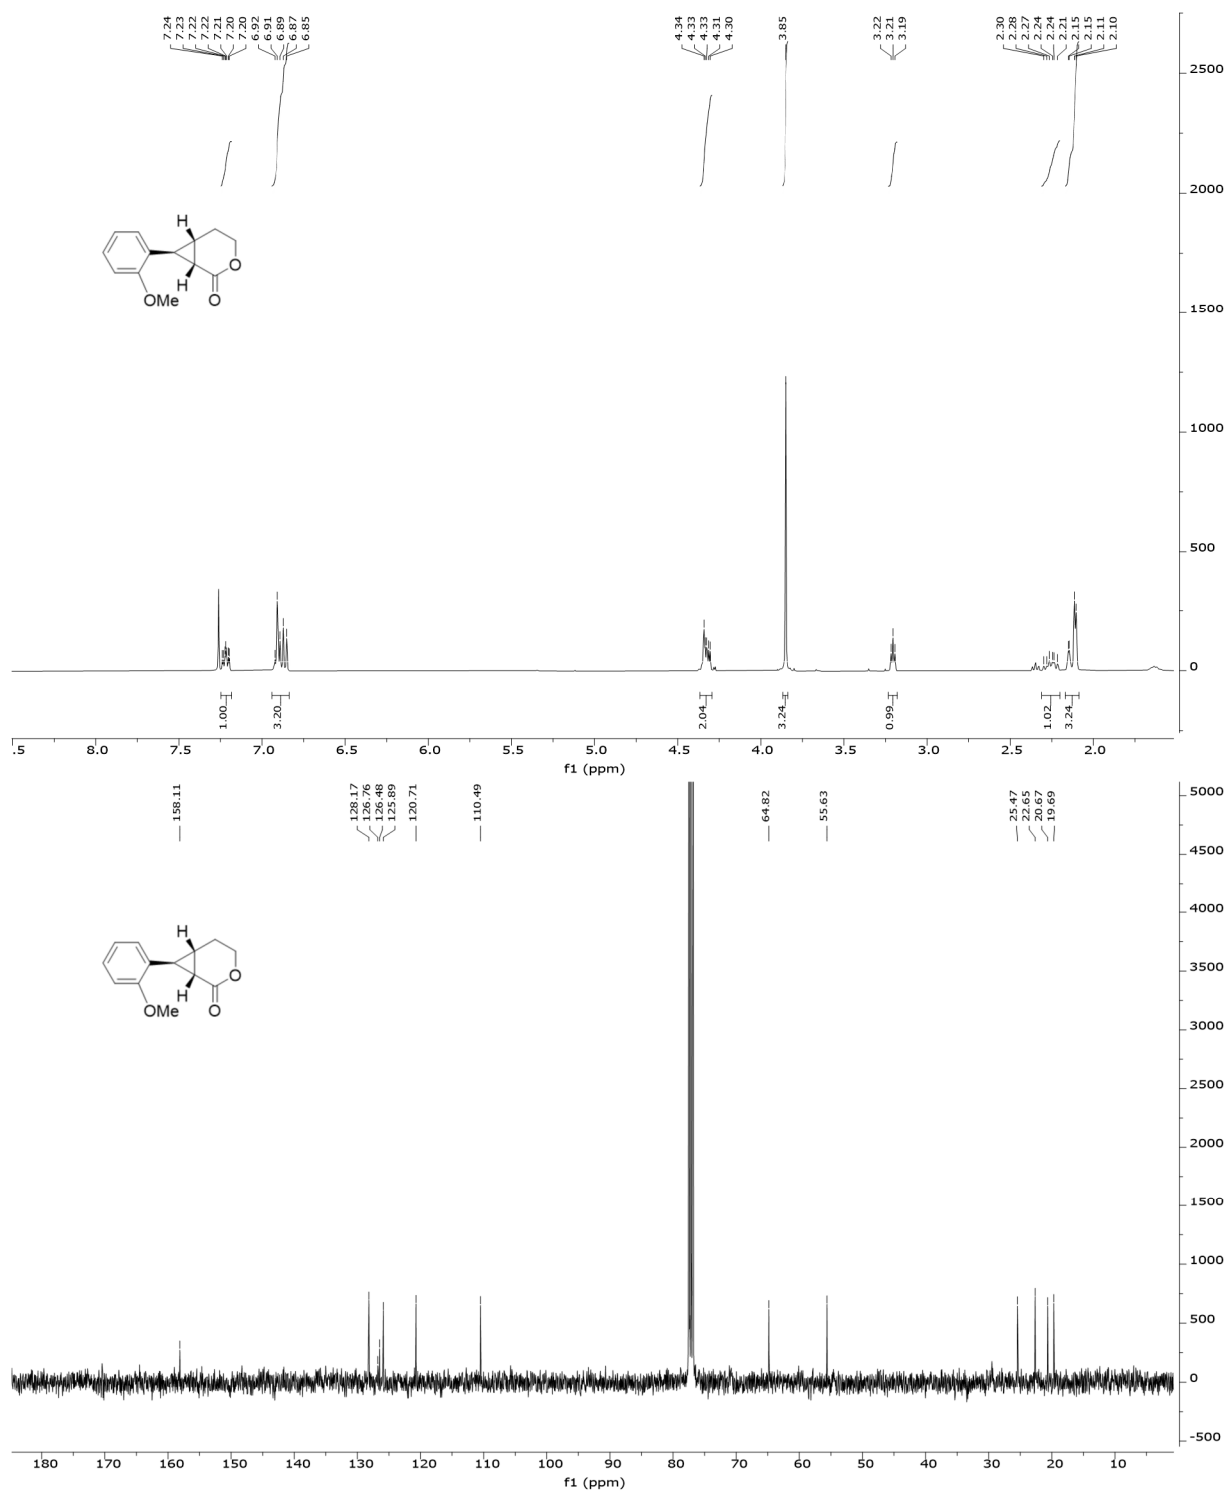

**(1S,6R)-7,7-dimethyl-3-oxabicyclo[4.1.0]heptan-2-one (2j):** 400 MHz  $^1\text{H}$  spectrum and 101 MHz  $^{13}\text{C}$  spectrum in  $\text{CDCl}_3$  solvent

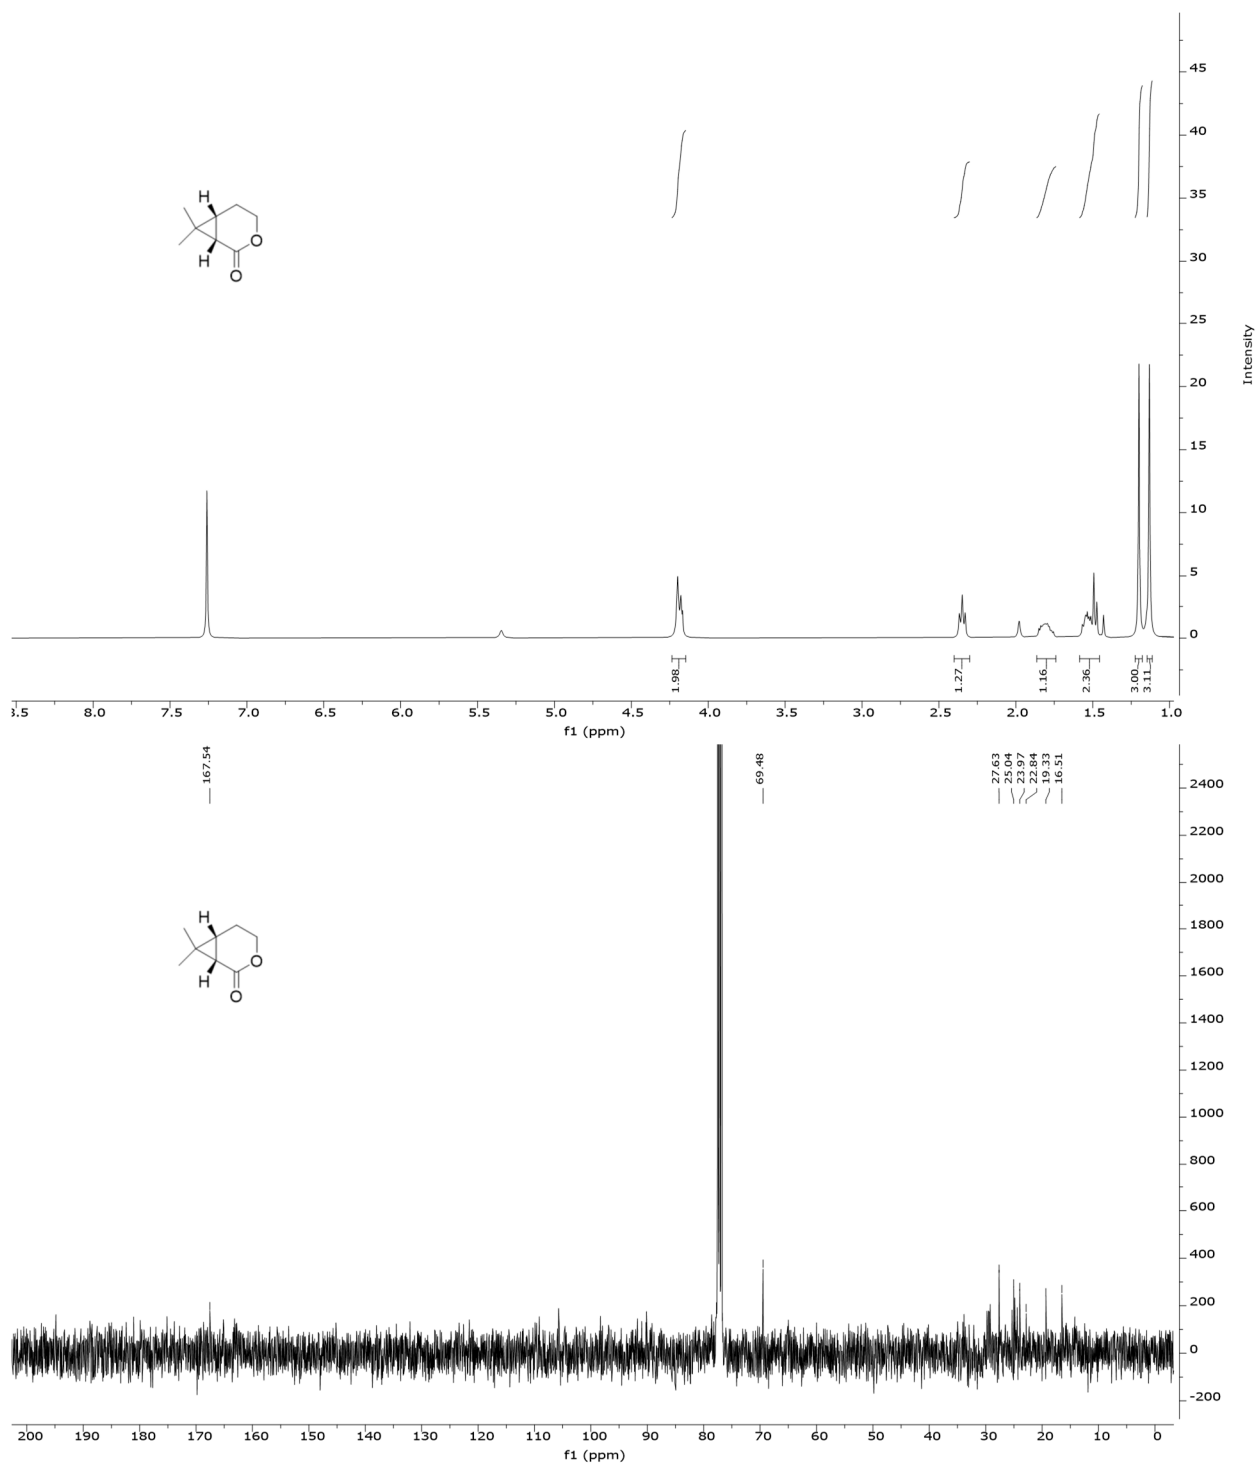

**2-((1S,2S,3S)-2-(hydroxymethyl)-3-phenylcyclopropyl)ethan-1-ol (4):** 500 MHz  $^1\text{H}$  spectrum and 126 MHz  $^{13}\text{C}$  spectrum in  $\text{CDCl}_3$  solvent

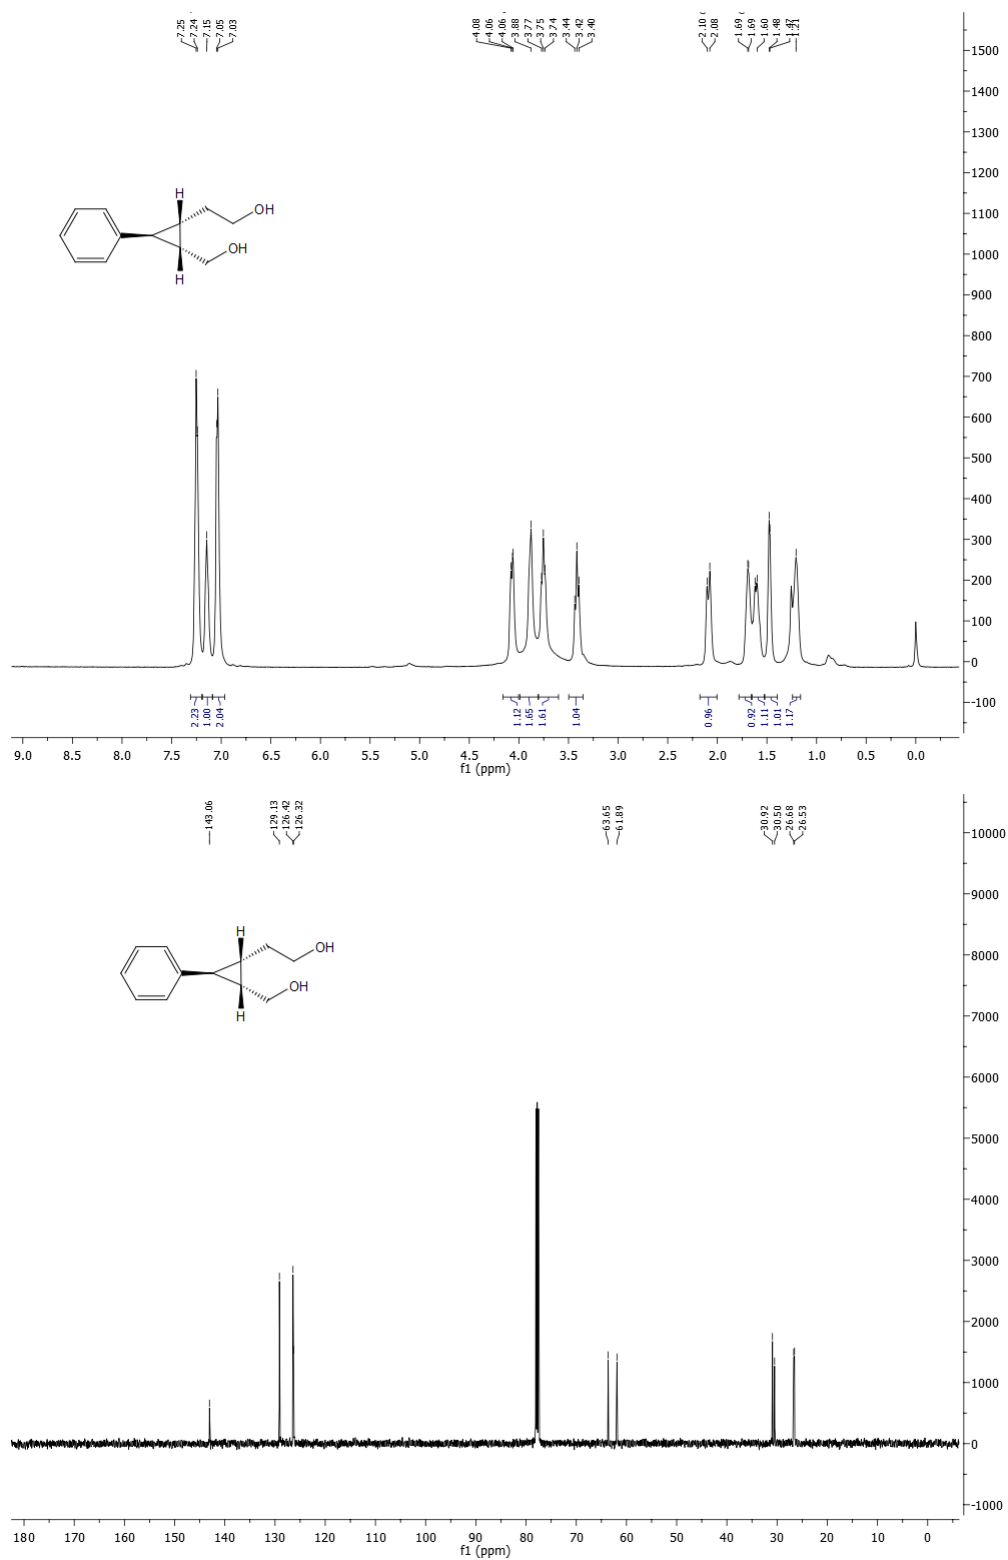

**(1S,2S,3S)-2-(2-hydroxyethyl)-3-phenylcyclopropane-1-carboxylic acid (5):** 500 MHz  $^1\text{H}$  spectrum and 126 MHz  $^{13}\text{C}$  spectrum in MeOD solvent

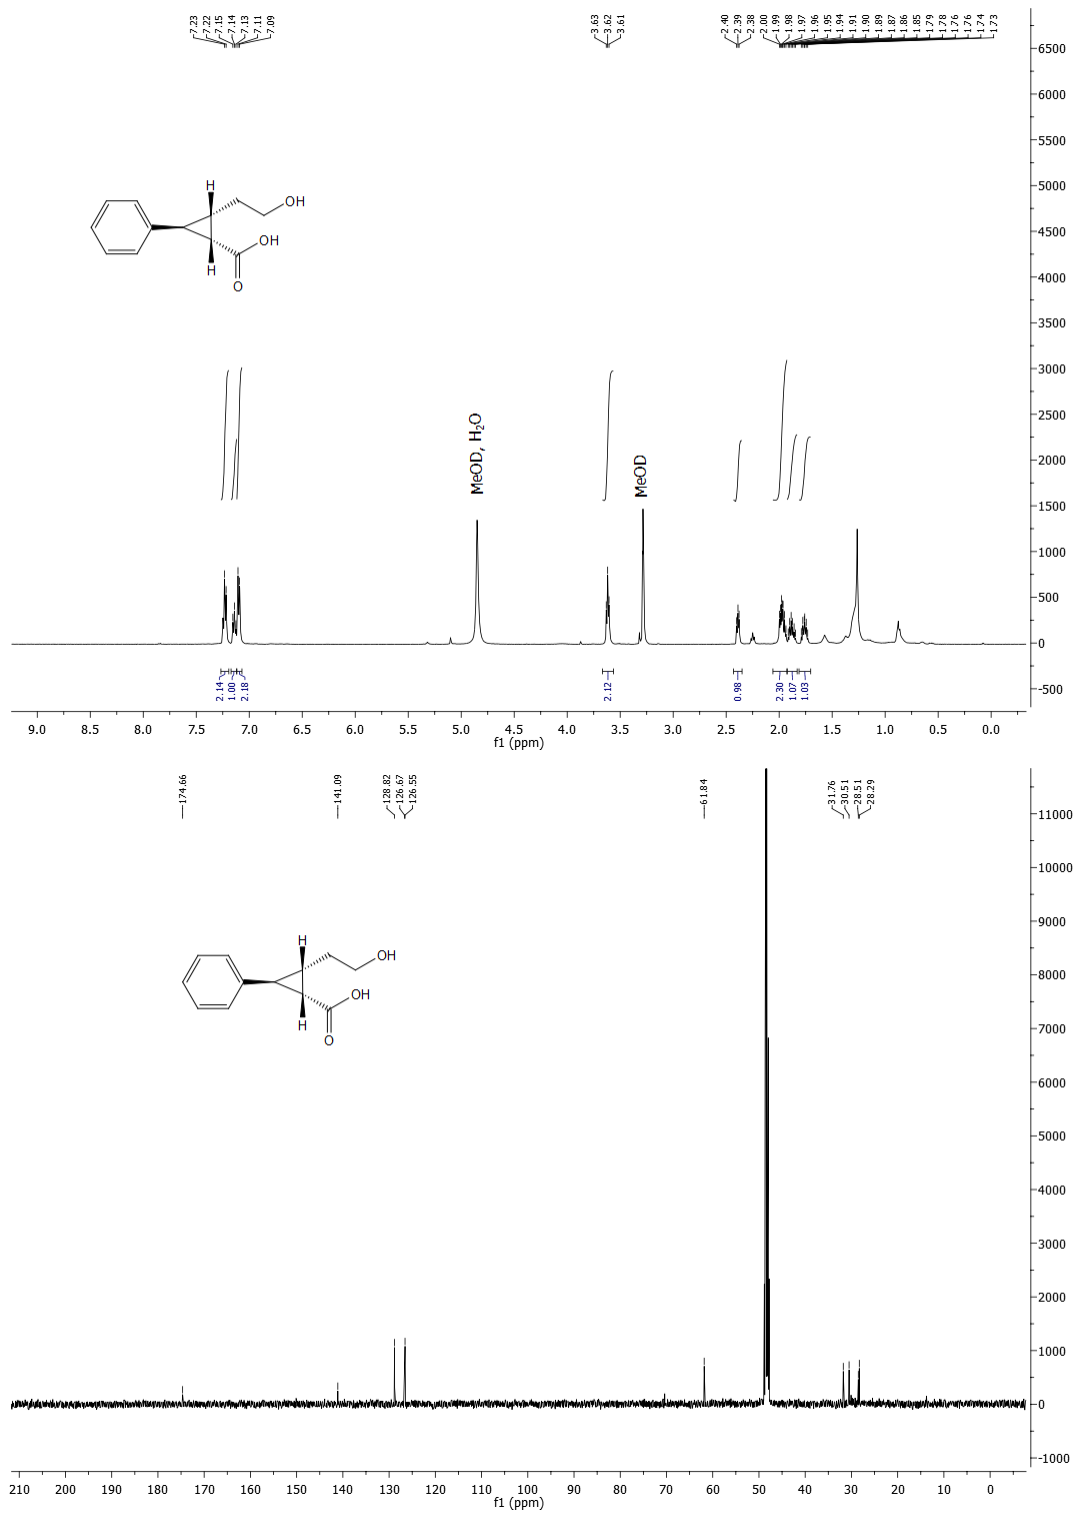

Supplement: NIHMS1728229-supplement-Supplemental_Information.pdf [file NIHMS1728229-supplement-Supplemental_Information.pdf]
